# Supplementary material for: Harnessing genome-wide genetic diversity, population structure and linkage disequilibrium in Ethiopian durum wheat gene pool
Source: Front Plant Sci. 2023 Jul 20;14:1192356. doi: 10.3389/fpls.2023.1192356 (PMC10400094; doi:10.3389/fpls.2023.1192356)
Supplement: Supplementary file 4 [file Table_1.xlsx]

## Sheet: Sheet1
Supplementary Table 1. Description of landraces and cultivars used in the present Study
	Population code	Accession code	Zone	Populations Abbreviations	Latitude (N)	Longitude(E)
46 Landraces	1	5328	East Hararge	EH1	09-26-00-N	41-48-00-E
	2	5254	North Shewa	NSH1	09-04-00-N	39-05-00-E
	3	5246	Wesh Shewa	WSH1	08-51-00-N	38-49-00-E
	4	5554	West Shewa	WSH3	08-51-00-N	38-30-00-E
	5	5388	West Hararge	WH	09-00-00-N	40-53-00-E
	6	5340	West Gojem	WGM1	10-34-00-N	37-29-00-E
	7	5207	West Gojem	WGM2	10-34-00-N	37-29-00-E
	8	5242	West Shewa	WSH2	09-04-00-N	38-15-00-E
	9	5057	Arsi	AR1	07-57-00-N	39-08-00-E
	10	5006	Bale	BL1	07-00-00-N	39-58-00-E
	11	5169	North Shewa	NSH2	08-50-00-N	39-19-00-E
	12	5561	North Gonder	NG1	12-43-00-N	37-30-00-E
	13	5294	North Gonder	NG2	12-43-00-N	37-30-00-E
	14	5365	East Shewa	ESH1	08-51-00-N	38-49-00-E
	15	5410	West Shewa	WSH4	08-51-00-N	38-30-00-E
	16	5299	North wollo	NW	11-37-00-N	39-40-00-E
	17	5005	Bale	BL2	07-00-00-N	39-58-00-E
	18	5518	North Omo	NO	06-31-41-N	36-57-41-E
	19	5230	Jimma	JM	07-37-36-N	37-43-22-E
	20	5125	North Gonder	NG3	12-55-00-N	37-47-00-E
	21	5100	East Hararge	EH2	09-26-00-N	41-48-00-E
	22	5565	East Shewa	ESH2	09-50-00-N	39-03-00-E
	23	5141	North Shewa	NSH3	09-10-00-N	39-05-00-E
	24	5152	Sidama	SM	09-29-00-N	38-30-00-E
	25	7207	West Shewa	WSH5	09-00-00-N	38-07-00-E
	26	5354	West Shewa	WSH6	08-51-00-N	38-30-00-E
	27	5373	West Shewa	WSH7	08-16-00-N	38-52-00-E
	28	5581	North Shewa	NSH4	09-02-00-N	39-06-00-E
	29	5582	East Shewa	ESH3	38-54-00-N	38-54-00-E
	30	5586	North Shewa	NSH5	09-19-00-N	39-17-00-E
	31	5609	North Shewa	NSH6	09-03-00-N	39-04-00-E
	32	5653	Tigray	TG1	14-07-00-N	38-29-00-E
	33	5707	North Shewa	NSH7	09-19-00-N	39-17-00-E
	34	5893	North Shewa	NSH8	09-49-00-N	39-12-00-E
	35	5103	East Hararge	EH3	09-26-00-N	41-48-00-E
	36	6983	Arsi	AR2	08-24-00-N	39-52-00-E
	37	7063	Arsi	AR3	07-49-00-N	39-55-00-E
	38	7104	North Shewa	NSH9	09-19-00-N	39-16-00-E
	39	7532	South Wollo	SW1	11-21-00-N	39-18-00-E
	40	7581	South Wollo	SW2	10-25-00-N	39-17-00-E
	41	7649	East Gojem	EGM	11-05-00-N	37-42-00-E
	42	222393	Arsi	AR4	07-47-00-N	39-39-00-E
	43	226897	West Shewa	WSH8	08-57-00-N	37-52-00-E
	44	242781	West Shewa	WSH9	08-45-00-N	39-15-00-E
	45	243698	Soth Wollo	SW3	11-02-00-N	39-15-00-E
	46	243717	Tigray	TG2	13-38-00-N	39-07-00-E
	47	Dembi	Debrezeit	MC	NA	NA
28 Cultivars	47	Bichena	Debrezeit	MC	NA	NA
	47	Robe	Debrezeit	MC	NA	NA
	47	Don-matteo	Debrezeit	MC	NA	NA
	47	Alem-tena	Debrezeit	MC	NA	NA
	47	Ld-357	Debrezeit	MC	NA	NA
	47	Tesfaye	Debrezeit	MC	NA	NA
	47	Werer	Debrezeit	MC	NA	NA
	47	Hitosa	Debrezeit	MC	NA	NA
	47	Utuba	Debrezeit	MC	NA	NA
	47	Gerardo	Debrezeit	MC	NA	NA
	47	Assasa	Debrezeit	MC	NA	NA
	47	Arandato	Debrezeit	MC	NA	NA
	47	Tob-66	Debrezeit	MC	NA	NA
	47	Boohai	Debrezeit	MC	NA	NA
	47	Cocorit-71	Debrezeit	MC	NA	NA
	47	Foka	Debrezeit	MC	NA	NA
	47	ude	Sinana	MC	NA	NA
	47	Bakalcha	Sinana	MC	NA	NA
	47	Ejersa	Sinana	MC	NA	NA
	47	Tate	Sinana	MC	NA	NA
	47	oda	Sinana	MC	NA	NA
	47	Toltu	Sinana	MC	NA	NA
	47	Ebsa	Sinana	MC	NA	NA
	47	Dire	Sinana	MC	NA	NA
	47	Ilani	Sinana	MC	NA	NA
	47	Leliso	Sinana	MC	NA	NA
	47	Bulala	Sinana	MC	NA	NA
