# Supplementary material for: Harnessing genome-wide genetic diversity, population structure and linkage disequilibrium in Ethiopian durum wheat gene pool
Source: Front Plant Sci. 2023 Jul 20;14:1192356. doi: 10.3389/fpls.2023.1192356 (PMC10400094; doi:10.3389/fpls.2023.1192356)
Supplement: Supplementary file 5 [file Table_2.xlsx]

## Sheet: Sheet1
Supplementary Table 2. Mean of several diversity indices signifying the magnitude and pattern of within-landraces genetic variation in 47 cultivated Ethiopian durum wheat populations using 8178 SNP markers. The indices include observed number of alleles (Na), number of effective alleles (Ne), Shannon’s diversity index (l), Genetic diversity (GD), percentage of polymorphic loci (%P), Observed hete…
Population	N	Na	Ne	%P	I	Ho	He	uHe	F	GD	HD	ND	TD
EH2	8	1	1	0	0	0	0	0	NA	0	0	1 x 10-5	NA
NG1	16	1.12656	1.01678	12.6559	0.0295653	1.52849e-05	0.0148173	0.0152953	0.998005	0.015	0.2	2 x 10-2	-1.99
NSH4	8	1.00012	1.00002	0.0122279	2.85879e-05	1.52849e-05	1.43296e-05	1.52849e-05	-0.0666667	0.0008	0.1	2 x 10-5	-1.16
NSH5	10	1.24652	1.17848	24.6515	0.150569	4.89117e-05	0.10352	0.108969	0.999307	0.105	0.6	11 x 10-2	2.38
TG2	10	1.28002	1.08438	28.002	0.107	7.33676e-05	0.0631658	0.0664903	0.99753	0.066	0.5	7 x 10-2	-0.66
EH1	14	1.51712	1.30849	51.7119	0.274335	8.73423e-05	0.182975	0.189752	0.999109	0.19	0.7	19 x 10-2	1.69
NSH8	10	1.00024	1.00014	0.0244559	0.000109032	0.000134507	7.27562e-05	7.65854e-05	-0.526316	0	0.6	1 x 10-4	0.26
NSH3	8	1.00024	1.00014	0.0244559	0.000113345	0.000137564	7.54692e-05	8.05005e-05	-0.533333	8e-05	0.6	1 x 10-4	0.24
WSH2	15	1.00024	1.00014	0.0244559	0.000114707	0.000138583	7.63566e-05	7.89896e-05	-0.535714	0	0.6	1 x 10-4	0.57
WSH4	16	1.00061	1.00016	0.0611396	0.000164358	0.000145207	9.76801e-05	0.000100831	-0.0193548	0	0.6	1 x 10-4	-0.9
SW3	12	1.19491	1.03527	19.4913	0.0559794	0.000152849	0.0298366	0.0311338	0.997886	0.031	0.7	3 x 10-2	-1.64
AR3	8	1.57753	1.20455	57.7525	0.242373	0.000198704	0.147219	0.157034	0.997481	0.157	0.7	16 x 10-2	-0.43
SW2	8	1.56848	1.26209	56.8476	0.269607	0.000229274	0.171696	0.183143	0.998475	0.183	0.9	18 x 10-2	0.3
NSH1	16	1.14368	1.0215	14.3678	0.0358531	0.000229274	0.018458	0.0190534	0.996796	0.019	0.7	2 x 10-2	-1.81
BL2	15	1.32649	1.0466	32.6486	0.0800631	0.000236407	0.0407133	0.0421172	0.998208	0.042	0.6	4 x 10-2	-1.92
WSH1	14	1.01528	1.00788	1.52849	0.00798418	0.000244559	0.00518689	0.00537899	0.968	0.005	0.7	1 x 10-2	1.43
WSH6	8	1.00024	1.00024	0.0244559	0.000169515	0.000244559	0.000122279	0.000130431	-1	0	0.5	1.3 x 10-2	1.97
ESH3	8	1.00024	1.00024	0.0244559	0.000169515	0.000244559	0.000122279	0.000130431	-1	0	0.5	1.3 x 10-4	1.97
NSH7	11	1.20775	1.04131	20.7753	0.0633536	0.000244559	0.0344009	0.036039	0.996609	0.036	0.6	4 x 10-2	-1.51
WSH5	8	1.00037	1.00037	0.0366838	0.000254273	0.000366838	0.000183419	0.000195647	-1	0	0.5	2 x 10-4	2.23
WSH8	8	1.74505	1.29925	74.5048	0.333234	0.000366838	0.207218	0.221032	0.997495	0.221	0.6	22 x 10-2	-0.07
WGM1	15	1.38518	1.07334	38.518	0.111534	0.000366838	0.0603709	0.0624527	0.996863	0.062	0.8	4 x 10-2	-1.4
NG2	8	1.37907	1.10632	37.9066	0.142864	0.000382123	0.0829713	0.0885027	0.996903	0.019	0.7	9 x 10-2	-0.99
NSH9	8	1.46124	1.19571	46.1237	0.209919	0.000397408	0.131716	0.140497	0.997757	0.141	0.8	14 x 10-2	0.05
SW1	9	1.5867	1.24377	58.6696	0.263712	0.000434771	0.165035	0.174743	0.997788	0.175	0.9	17 x 10-2	0.11
SM	8	1.00831	1.00464	0.831499	0.00433159	0.000596112	0.00284968	0.00303966	0.856209	0.003	0.9	3 x 10-3	0.91
EGM	12	1.3628	1.06611	36.2803	0.10446	0.000703106	0.0557564	0.0581806	0.99457	0.058	0.9	6 x 10-2	-1.63
WSH7	9	1.19663	1.04817	19.6625	0.0681885	0.000774435	0.0385867	0.0408565	0.975446	0.041	0.6	4 x 10-2	-1.22
AR4	8	1.48484	1.13667	48.4837	0.183086	0.00114637	0.106426	0.113521	0.994569	0.114	0.8	11 x 10-2	-0.98
WH	8	1.19222	1.04953	19.2223	0.0681645	0.00401993	0.0390367	0.0416392	0.829319	0.042	0.7	4 x 10-2	-1.24
ESH1	8	1.13769	1.02867	13.7686	0.0422245	0.00862069	0.0232713	0.0248227	0.472105	0.025	0.8	2 x 10-2	-1.76
AR2	12	1.34972	1.06109	34.9719	0.0926985	0.00950721	0.0494157	0.0515642	0.676239	0.052	0.9	5 x 10-2	-1.82
TG1	9	1.2684	1.14701	26.8403	0.134037	0.0127442	0.0879324	0.0931049	0.884938	0.093	1	10x 10-2	0.83
NSH2	15	1.24199	1.01723	24.1991	0.035868	0.0162631	0.0159379	0.0164875	-0.022815	0.016	0.6	2 x 10-2	-2.86
SO	15	1.26816	1.01893	26.8158	0.0396375	0.0178854	0.0175783	0.0181845	-0.0230416	0.018	0.6	2 x 10-2	-2.86
WGM2	15	1.27598	1.0198	27.5984	0.0410453	0.0185538	0.0182691	0.018899	-0.0197469	0.019	0.6	2 x 10-2	-2.85
WSH9	12	1.64674	1.17585	64.6735	0.228517	0.0233044	0.132494	0.138255	0.792308	0.138	1	14 x 10-2	-0.82
NG3	15	1.53326	1.21098	53.326	0.238053	0.026502	0.147994	0.153097	0.710137	0.153	0.4	15 x 10-2	0.54
JM	8	1.36659	1.11759	36.6593	0.135027	0.0286592	0.0811925	0.0866053	0.429532	0.087	0.9	9 x 10-2	-0.95
ESH2	8	1.23111	1.03126	23.1108	0.0545096	0.0287662	0.0274364	0.0292655	-0.0556849	0.029	0.7	3 x 10-2	-2.55
EH3	15	1.43947	1.19627	43.9472	0.198116	0.0306432	0.126142	0.130492	0.760859	0.13	0.8	13x 10-2	0.69
NW	8	1.49327	1.25304	49.3275	0.252112	0.0323887	0.163817	0.174738	0.697886	0.175	0.8	17 x 10-2	0.77
NSH6	12	1.62778	1.05517	62.7782	0.109569	0.0517038	0.0506703	0.0528734	-0.0312833	0.053	0.2	5 x 10-2	-2.78
AR1	15	1.49438	1.06536	49.4375	0.110896	0.0597538	0.056318	0.05826	-0.056034	0.058	0.7	4 x 10-2	-2.1
WSH3	8	1.71509	1.26417	71.5089	0.293439	0.0613383	0.180338	0.192361	0.553297	0.192	1	2 x 10-2	-0.47
BL1	9	1.64319	1.26146	64.3189	0.278718	0.0675797	0.17495	0.185241	0.443289	0.185	0.9	19 x 10-2	-0.04
MC	28	1.85608	1.37114	85.65	0.358668	0.00168571	0.228866	0.233027	0.992919	0.223	0.6	23 x 10-2	-0.06
Mean		1.31059	1.10058	31.06	0.115967	0.0108144	0.0699009	0.0735523	0.502344	0.0717421	1	34 x 10-2	4.5
