# Supplementary material for: Harnessing genome-wide genetic diversity, population structure and linkage disequilibrium in Ethiopian durum wheat gene pool
Source: Front Plant Sci. 2023 Jul 20;14:1192356. doi: 10.3389/fpls.2023.1192356 (PMC10400094; doi:10.3389/fpls.2023.1192356)
Supplement: Supplementary file 6 [file Table_3.xlsx]

## Sheet: Sheet1
Supplementary Table 3. Mean diversity indices of 8178 SNP markers depicting the genetic variation across all populations’ of Ethiopian durum wheat used in this study. The indices include deficiency or excess of average heterozygotes in each population (FIS), the deficiency or excess of average heterozygotes in a group of populations (FIT), and the degree of genetic differentiation among populatio…
Locus	Fis	Fit	Fst	Nm	I	Ho	He	uHe	F
wsnp_Ku_c1307_2606226	0.713155	0.988555	0.960101	0.0103892	0.0192096	0.00283688	0.00988992	0.0103752	0.482759
Excalibur_c97157_65	0.839826	0.978724	0.867171	0.0382937	0.0210827	0.00177305	0.0110695	0.0116216	0.73913
Tdurum_contig10210_425	0.85384	0.984827	0.896188	0.0289592	0.0215076	0.00177305	0.0121309	0.0126949	0.873016
CAP12_rep_c4520_207	0.85384	0.977471	0.845858	0.045558	0.0215076	0.00177305	0.0121309	0.0126949	0.873016
Excalibur_c15733_252	0.715702	0.970383	0.895824	0.0290726	0.0229962	0.0035461	0.0124732	0.0130863	0.643892
Excalibur_c3108_5476	0.715702	0.970383	0.895824	0.0290726	0.0229962	0.0035461	0.0124732	0.0130863	0.643892
Tdurum_contig48302_532	0.715702	0.970383	0.895824	0.0290726	0.0229962	0.0035461	0.0124732	0.0130863	0.643892
AX-109420889	0.715702	0.956605	0.847361	0.0450338	0.0229962	0.0035461	0.0124732	0.0130863	0.643892
AX-110039270	0.715702	0.956605	0.847361	0.0450338	0.0229962	0.0035461	0.0124732	0.0130863	0.643892
AX-111656814	0.715702	0.956605	0.847361	0.0450338	0.0229962	0.0035461	0.0124732	0.0130863	0.643892
AX-158523658	0.715702	0.956605	0.847361	0.0450338	0.0229962	0.0035461	0.0124732	0.0130863	0.643892
AX-158533097	0.715702	0.956605	0.847361	0.0450338	0.0229962	0.0035461	0.0124732	0.0130863	0.643892
AX-158537282	0.715702	0.956605	0.847361	0.0450338	0.0229962	0.0035461	0.0124732	0.0130863	0.643892
AX-158538742	0.715702	0.956605	0.847361	0.0450338	0.0229962	0.0035461	0.0124732	0.0130863	0.643892
AX-158540295	0.715702	0.956605	0.847361	0.0450338	0.0229962	0.0035461	0.0124732	0.0130863	0.643892
AX-158547881	0.715702	0.956605	0.847361	0.0450338	0.0229962	0.0035461	0.0124732	0.0130863	0.643892
AX-158548020	0.715702	0.956605	0.847361	0.0450338	0.0229962	0.0035461	0.0124732	0.0130863	0.643892
AX-158585004	0.715702	0.956605	0.847361	0.0450338	0.0229962	0.0035461	0.0124732	0.0130863	0.643892
AX-94863436	0.715702	0.956605	0.847361	0.0450338	0.0229962	0.0035461	0.0124732	0.0130863	0.643892
BobWhite_c45118_495	0.715702	0.956605	0.847361	0.0450338	0.0229962	0.0035461	0.0124732	0.0130863	0.643892
BobWhite_c9057_118	0.715702	0.956605	0.847361	0.0450338	0.0229962	0.0035461	0.0124732	0.0130863	0.643892
BS00065529_51	0.715702	0.956605	0.847361	0.0450338	0.0229962	0.0035461	0.0124732	0.0130863	0.643892
CAP12_c5387_372	0.715702	0.956605	0.847361	0.0450338	0.0229962	0.0035461	0.0124732	0.0130863	0.643892
Ex_c7397_535	0.715702	0.956605	0.847361	0.0450338	0.0229962	0.0035461	0.0124732	0.0130863	0.643892
Excalibur_c113078_320	0.715702	0.956605	0.847361	0.0450338	0.0229962	0.0035461	0.0124732	0.0130863	0.643892
Excalibur_c16569_535	0.715702	0.956605	0.847361	0.0450338	0.0229962	0.0035461	0.0124732	0.0130863	0.643892
Excalibur_c56240_200	0.715702	0.956605	0.847361	0.0450338	0.0229962	0.0035461	0.0124732	0.0130863	0.643892
Excalibur_c9617_292	0.715702	0.956605	0.847361	0.0450338	0.0229962	0.0035461	0.0124732	0.0130863	0.643892
Excalibur_rep_c79404_164	0.715702	0.956605	0.847361	0.0450338	0.0229962	0.0035461	0.0124732	0.0130863	0.643892
GENE-3314_78	0.715702	0.956605	0.847361	0.0450338	0.0229962	0.0035461	0.0124732	0.0130863	0.643892
Kukri_c1308_2782	0.715702	0.956605	0.847361	0.0450338	0.0229962	0.0035461	0.0124732	0.0130863	0.643892
Kukri_rep_c69970_717	0.715702	0.956605	0.847361	0.0450338	0.0229962	0.0035461	0.0124732	0.0130863	0.643892
RAC875_c1227_1098	0.715702	0.956605	0.847361	0.0450338	0.0229962	0.0035461	0.0124732	0.0130863	0.643892
RAC875_c21280_2176	0.715702	0.956605	0.847361	0.0450338	0.0229962	0.0035461	0.0124732	0.0130863	0.643892
RAC875_c47550_437	0.715702	0.956605	0.847361	0.0450338	0.0229962	0.0035461	0.0124732	0.0130863	0.643892
wsnp_Ex_c16569_25082817	0.715702	0.956605	0.847361	0.0450338	0.0229962	0.0035461	0.0124732	0.0130863	0.643892
wsnp_Ex_c18223_27035083	0.715702	0.956605	0.847361	0.0450338	0.0229962	0.0035461	0.0124732	0.0130863	0.643892
wsnp_Ex_c2181_4089639	0.715702	0.956605	0.847361	0.0450338	0.0229962	0.0035461	0.0124732	0.0130863	0.643892
wsnp_Ex_c8517_14315660	0.715702	0.956605	0.847361	0.0450338	0.0229962	0.0035461	0.0124732	0.0130863	0.643892
wsnp_Ex_rep_c67786_66472676	0.715702	0.956605	0.847361	0.0450338	0.0229962	0.0035461	0.0124732	0.0130863	0.643892
BS00024548_51	0.867478	0.977064	0.826925	0.0523251	0.0232774	0.00177305	0.0133793	0.0139659	0.873016
AX-158543779	0.870854	0.977863	0.828586	0.0517187	0.0245662	0.00177305	0.0137291	0.0143968	0.73913
AX-158561966	0.870854	0.977863	0.828586	0.0517187	0.0245662	0.00177305	0.0137291	0.0143968	0.73913
AX-158575264	0.870854	0.977863	0.828586	0.0517187	0.0245662	0.00177305	0.0137291	0.0143968	0.73913
AX-158621051	0.870854	0.977863	0.828586	0.0517187	0.0245662	0.00177305	0.0137291	0.0143968	0.73913
AX-95119354	0.870854	0.977863	0.828586	0.0517187	0.0245662	0.00177305	0.0137291	0.0143968	0.73913
BS00022940_51	0.870854	0.977863	0.828586	0.0517187	0.0245662	0.00177305	0.0137291	0.0143968	0.73913
BS00089734_51	0.870854	0.977863	0.828586	0.0517187	0.0245662	0.00177305	0.0137291	0.0143968	0.73913
BS00099097_51	0.870854	0.977863	0.828586	0.0517187	0.0245662	0.00177305	0.0137291	0.0143968	0.73913
Excalibur_c6876_523	0.870854	0.977863	0.828586	0.0517187	0.0245662	0.00177305	0.0137291	0.0143968	0.73913
Excalibur_c99477_90	0.870854	0.977863	0.828586	0.0517187	0.0245662	0.00177305	0.0137291	0.0143968	0.73913
IAAV2784	0.870854	0.977863	0.828586	0.0517187	0.0245662	0.00177305	0.0137291	0.0143968	0.73913
IAAV3789	0.870854	0.977863	0.828586	0.0517187	0.0245662	0.00177305	0.0137291	0.0143968	0.73913
Kukri_c15594_386	0.870854	0.977863	0.828586	0.0517187	0.0245662	0.00177305	0.0137291	0.0143968	0.73913
Kukri_c40953_658	0.870854	0.977863	0.828586	0.0517187	0.0245662	0.00177305	0.0137291	0.0143968	0.73913
Kukri_c7139_6288	0.870854	0.977863	0.828586	0.0517187	0.0245662	0.00177305	0.0137291	0.0143968	0.73913
RAC875_c25277_324	0.870854	0.977863	0.828586	0.0517187	0.0245662	0.00177305	0.0137291	0.0143968	0.73913
RAC875_c7988_1588	0.870854	0.977863	0.828586	0.0517187	0.0245662	0.00177305	0.0137291	0.0143968	0.73913
RFL_Contig1385_326	0.870854	0.977863	0.828586	0.0517187	0.0245662	0.00177305	0.0137291	0.0143968	0.73913
RFL_Contig189_894	0.870854	0.977863	0.828586	0.0517187	0.0245662	0.00177305	0.0137291	0.0143968	0.73913
Tdurum_contig61682_187	0.870854	0.977863	0.828586	0.0517187	0.0245662	0.00177305	0.0137291	0.0143968	0.73913
TGWA25K-TG0239	0.870854	0.977863	0.828586	0.0517187	0.0245662	0.00177305	0.0137291	0.0143968	0.73913
TGWA25K-TG0288	0.870854	0.977863	0.828586	0.0517187	0.0245662	0.00177305	0.0137291	0.0143968	0.73913
wsnp_Ex_c14595_22634031	0.870854	0.977863	0.828586	0.0517187	0.0245662	0.00177305	0.0137291	0.0143968	0.73913
wsnp_Ex_rep_c67671_66332423	0.870854	0.977863	0.828586	0.0517187	0.0245662	0.00177305	0.0137291	0.0143968	0.73913
wsnp_Ra_c16813_25556454	0.870854	0.977863	0.828586	0.0517187	0.0245662	0.00177305	0.0137291	0.0143968	0.73913
RAC875_c41476_217	0.792315	0.959833	0.806595	0.0599448	0.0248475	0.00303951	0.0146352	0.0152765	0.751111
AX-158529799	0.870342	0.97799	0.830248	0.0511149	0.0250492	0.00177305	0.0136748	0.0142743	0.73913
AX-158586107	0.870342	0.97799	0.830248	0.0511149	0.0250492	0.00177305	0.0136748	0.0142743	0.73913
AX-94721806	0.870342	0.97799	0.830248	0.0511149	0.0250492	0.00177305	0.0136748	0.0142743	0.73913
AX-94814963	0.870342	0.97799	0.830248	0.0511149	0.0250492	0.00177305	0.0136748	0.0142743	0.73913
AX-95130702	0.870342	0.97799	0.830248	0.0511149	0.0250492	0.00177305	0.0136748	0.0142743	0.73913
RAC875_rep_c101299_88	0.870342	0.97799	0.830248	0.0511149	0.0250492	0.00177305	0.0136748	0.0142743	0.73913
wsnp_Ex_c12102_19361467	0.743595	0.970051	0.883197	0.0330625	0.0251929	0.0035461	0.0138301	0.0144679	0.643892
AX-108953209	0.743595	0.955853	0.827824	0.0519965	0.0251929	0.0035461	0.0138301	0.0144679	0.643892
AX-111055262	0.743595	0.955853	0.827824	0.0519965	0.0251929	0.0035461	0.0138301	0.0144679	0.643892
AX-158525581	0.743595	0.955853	0.827824	0.0519965	0.0251929	0.0035461	0.0138301	0.0144679	0.643892
AX-158541420	0.743595	0.955853	0.827824	0.0519965	0.0251929	0.0035461	0.0138301	0.0144679	0.643892
AX-158542785	0.743595	0.955853	0.827824	0.0519965	0.0251929	0.0035461	0.0138301	0.0144679	0.643892
AX-158542876	0.743595	0.955853	0.827824	0.0519965	0.0251929	0.0035461	0.0138301	0.0144679	0.643892
AX-158550750	0.743595	0.955853	0.827824	0.0519965	0.0251929	0.0035461	0.0138301	0.0144679	0.643892
AX-158565042	0.743595	0.955853	0.827824	0.0519965	0.0251929	0.0035461	0.0138301	0.0144679	0.643892
AX-158565499	0.743595	0.955853	0.827824	0.0519965	0.0251929	0.0035461	0.0138301	0.0144679	0.643892
AX-158565675	0.743595	0.955853	0.827824	0.0519965	0.0251929	0.0035461	0.0138301	0.0144679	0.643892
AX-158589283	0.743595	0.955853	0.827824	0.0519965	0.0251929	0.0035461	0.0138301	0.0144679	0.643892
AX-158604296	0.743595	0.955853	0.827824	0.0519965	0.0251929	0.0035461	0.0138301	0.0144679	0.643892
AX-86163895	0.743595	0.955853	0.827824	0.0519965	0.0251929	0.0035461	0.0138301	0.0144679	0.643892
AX-94457680	0.743595	0.955853	0.827824	0.0519965	0.0251929	0.0035461	0.0138301	0.0144679	0.643892
AX-94550326	0.743595	0.955853	0.827824	0.0519965	0.0251929	0.0035461	0.0138301	0.0144679	0.643892
AX-94602689	0.743595	0.955853	0.827824	0.0519965	0.0251929	0.0035461	0.0138301	0.0144679	0.643892
AX-94884814	0.743595	0.955853	0.827824	0.0519965	0.0251929	0.0035461	0.0138301	0.0144679	0.643892
AX-94974108	0.743595	0.955853	0.827824	0.0519965	0.0251929	0.0035461	0.0138301	0.0144679	0.643892
BS00000006_51	0.743595	0.955853	0.827824	0.0519965	0.0251929	0.0035461	0.0138301	0.0144679	0.643892
BS00022098_51	0.743595	0.955853	0.827824	0.0519965	0.0251929	0.0035461	0.0138301	0.0144679	0.643892
BS00029869_51	0.743595	0.955853	0.827824	0.0519965	0.0251929	0.0035461	0.0138301	0.0144679	0.643892
Ex_c2171_2600	0.743595	0.955853	0.827824	0.0519965	0.0251929	0.0035461	0.0138301	0.0144679	0.643892
Ex_c2615_564	0.743595	0.955853	0.827824	0.0519965	0.0251929	0.0035461	0.0138301	0.0144679	0.643892
Excalibur_c59894_97	0.743595	0.955853	0.827824	0.0519965	0.0251929	0.0035461	0.0138301	0.0144679	0.643892
GENE-2673_1010	0.743595	0.955853	0.827824	0.0519965	0.0251929	0.0035461	0.0138301	0.0144679	0.643892
GENE-3983_99	0.743595	0.955853	0.827824	0.0519965	0.0251929	0.0035461	0.0138301	0.0144679	0.643892
Ku_c11429_519	0.743595	0.955853	0.827824	0.0519965	0.0251929	0.0035461	0.0138301	0.0144679	0.643892
Ku_c12469_983	0.743595	0.955853	0.827824	0.0519965	0.0251929	0.0035461	0.0138301	0.0144679	0.643892
Kukri_c17997_389	0.743595	0.955853	0.827824	0.0519965	0.0251929	0.0035461	0.0138301	0.0144679	0.643892
Kukri_c441_891	0.743595	0.955853	0.827824	0.0519965	0.0251929	0.0035461	0.0138301	0.0144679	0.643892
Kukri_c44442_274	0.743595	0.955853	0.827824	0.0519965	0.0251929	0.0035461	0.0138301	0.0144679	0.643892
Kukri_c5594_717	0.743595	0.955853	0.827824	0.0519965	0.0251929	0.0035461	0.0138301	0.0144679	0.643892
Kukri_c62247_248	0.743595	0.955853	0.827824	0.0519965	0.0251929	0.0035461	0.0138301	0.0144679	0.643892
Kukri_c8288_2063	0.743595	0.955853	0.827824	0.0519965	0.0251929	0.0035461	0.0138301	0.0144679	0.643892
Ra_c1726_1071	0.743595	0.955853	0.827824	0.0519965	0.0251929	0.0035461	0.0138301	0.0144679	0.643892
Ra_c73292_443	0.743595	0.955853	0.827824	0.0519965	0.0251929	0.0035461	0.0138301	0.0144679	0.643892
RAC875_c48885_107	0.743595	0.955853	0.827824	0.0519965	0.0251929	0.0035461	0.0138301	0.0144679	0.643892
RAC875_c48885_142	0.743595	0.955853	0.827824	0.0519965	0.0251929	0.0035461	0.0138301	0.0144679	0.643892
RAC875_c86680_391	0.743595	0.955853	0.827824	0.0519965	0.0251929	0.0035461	0.0138301	0.0144679	0.643892
Tdurum_contig10843_745	0.743595	0.955853	0.827824	0.0519965	0.0251929	0.0035461	0.0138301	0.0144679	0.643892
Tdurum_contig17230_542	0.743595	0.955853	0.827824	0.0519965	0.0251929	0.0035461	0.0138301	0.0144679	0.643892
Tdurum_contig50175_875	0.743595	0.955853	0.827824	0.0519965	0.0251929	0.0035461	0.0138301	0.0144679	0.643892
wsnp_Ex_c1924_3630249	0.743595	0.955853	0.827824	0.0519965	0.0251929	0.0035461	0.0138301	0.0144679	0.643892
wsnp_Ex_c2171_4072774	0.743595	0.955853	0.827824	0.0519965	0.0251929	0.0035461	0.0138301	0.0144679	0.643892
wsnp_Ex_c2171_4072995	0.743595	0.955853	0.827824	0.0519965	0.0251929	0.0035461	0.0138301	0.0144679	0.643892
wsnp_Ex_c2171_4073721	0.743595	0.955853	0.827824	0.0519965	0.0251929	0.0035461	0.0138301	0.0144679	0.643892
wsnp_Ex_c2615_4862266	0.743595	0.955853	0.827824	0.0519965	0.0251929	0.0035461	0.0138301	0.0144679	0.643892
wsnp_Ex_c40019_47166980	0.743595	0.955853	0.827824	0.0519965	0.0251929	0.0035461	0.0138301	0.0144679	0.643892
wsnp_Ex_c4883_8705816	0.743595	0.955853	0.827824	0.0519965	0.0251929	0.0035461	0.0138301	0.0144679	0.643892
AX-110387993	0.873576	0.978724	0.831712	0.0505849	0.0254139	0.00177305	0.0140246	0.0147052	0.904762
Tdurum_contig14863_916	0.761	0.954808	0.810911	0.0582953	0.0258679	0.0035461	0.0148372	0.0155532	0.675973
AX-158560436	0.88598	0.976202	0.791281	0.0659433	0.0260162	0.00177305	0.0155504	0.0161765	0.873016
AX-158569255	0.641403	0.958103	0.883164	0.033073	0.0261057	0.00496454	0.0138443	0.0145048	0.508217
GENE-2944_81	0.880318	0.977603	0.812862	0.0575551	0.0265304	0.00177305	0.0148146	0.0154348	0.73913
Kukri_c60966_261	0.880318	0.977603	0.812862	0.0575551	0.0265304	0.00177305	0.0148146	0.0154348	0.73913
AX-158538892	0.882471	0.977471	0.808309	0.0592878	0.0267629	0.00177305	0.015086	0.0157784	0.73913
AX-158564434	0.882471	0.977471	0.808309	0.0592878	0.0267629	0.00177305	0.015086	0.0157784	0.73913
AX-94401336	0.882471	0.977471	0.808309	0.0592878	0.0267629	0.00177305	0.015086	0.0157784	0.73913
AX-94661712	0.882471	0.977471	0.808309	0.0592878	0.0267629	0.00177305	0.015086	0.0157784	0.73913
AX-95153132	0.882471	0.977471	0.808309	0.0592878	0.0267629	0.00177305	0.015086	0.0157784	0.73913
BS00064935_51	0.882471	0.977471	0.808309	0.0592878	0.0267629	0.00177305	0.015086	0.0157784	0.73913
BS00065555_51	0.882471	0.977471	0.808309	0.0592878	0.0267629	0.00177305	0.015086	0.0157784	0.73913
Ex_c12584_2014	0.882471	0.977471	0.808309	0.0592878	0.0267629	0.00177305	0.015086	0.0157784	0.73913
Ex_c25689_1606	0.882471	0.977471	0.808309	0.0592878	0.0267629	0.00177305	0.015086	0.0157784	0.73913
Ku_c23960_333	0.882471	0.977471	0.808309	0.0592878	0.0267629	0.00177305	0.015086	0.0157784	0.73913
Ra_c59822_1439	0.882471	0.977471	0.808309	0.0592878	0.0267629	0.00177305	0.015086	0.0157784	0.73913
AX-158527166	0.764824	0.955074	0.808969	0.0590355	0.0269627	0.0035461	0.0150785	0.015739	0.643892
AX-158567071	0.764824	0.955074	0.808969	0.0590355	0.0269627	0.0035461	0.0150785	0.015739	0.643892
AX-158584239	0.764824	0.955074	0.808969	0.0590355	0.0269627	0.0035461	0.0150785	0.015739	0.643892
AX-158587853	0.764824	0.955074	0.808969	0.0590355	0.0269627	0.0035461	0.0150785	0.015739	0.643892
AX-158588008	0.764824	0.955074	0.808969	0.0590355	0.0269627	0.0035461	0.0150785	0.015739	0.643892
AX-158591089	0.764824	0.955074	0.808969	0.0590355	0.0269627	0.0035461	0.0150785	0.015739	0.643892
AX-94426042	0.764824	0.955074	0.808969	0.0590355	0.0269627	0.0035461	0.0150785	0.015739	0.643892
AX-94702510	0.764824	0.955074	0.808969	0.0590355	0.0269627	0.0035461	0.0150785	0.015739	0.643892
BS00022605_51	0.764824	0.955074	0.808969	0.0590355	0.0269627	0.0035461	0.0150785	0.015739	0.643892
BS00023089_51	0.764824	0.955074	0.808969	0.0590355	0.0269627	0.0035461	0.0150785	0.015739	0.643892
BS00024191_51	0.764824	0.955074	0.808969	0.0590355	0.0269627	0.0035461	0.0150785	0.015739	0.643892
BS00065079_51	0.764824	0.955074	0.808969	0.0590355	0.0269627	0.0035461	0.0150785	0.015739	0.643892
BS00078715_51	0.764824	0.955074	0.808969	0.0590355	0.0269627	0.0035461	0.0150785	0.015739	0.643892
BS00087178_51	0.764824	0.955074	0.808969	0.0590355	0.0269627	0.0035461	0.0150785	0.015739	0.643892
BS00111120_51	0.764824	0.955074	0.808969	0.0590355	0.0269627	0.0035461	0.0150785	0.015739	0.643892
Excalibur_c49239_97	0.764824	0.955074	0.808969	0.0590355	0.0269627	0.0035461	0.0150785	0.015739	0.643892
Excalibur_c60816_99	0.764824	0.955074	0.808969	0.0590355	0.0269627	0.0035461	0.0150785	0.015739	0.643892
IAAV1385	0.764824	0.955074	0.808969	0.0590355	0.0269627	0.0035461	0.0150785	0.015739	0.643892
IAAV6535	0.764824	0.955074	0.808969	0.0590355	0.0269627	0.0035461	0.0150785	0.015739	0.643892
Kukri_c1281_515	0.764824	0.955074	0.808969	0.0590355	0.0269627	0.0035461	0.0150785	0.015739	0.643892
RAC875_c60707_1852	0.764824	0.955074	0.808969	0.0590355	0.0269627	0.0035461	0.0150785	0.015739	0.643892
TA001414-0867	0.764824	0.955074	0.808969	0.0590355	0.0269627	0.0035461	0.0150785	0.015739	0.643892
Tdurum_contig10194_765	0.764824	0.955074	0.808969	0.0590355	0.0269627	0.0035461	0.0150785	0.015739	0.643892
TG0140	0.764824	0.955074	0.808969	0.0590355	0.0269627	0.0035461	0.0150785	0.015739	0.643892
TGWA25K-TG0140	0.764824	0.955074	0.808969	0.0590355	0.0269627	0.0035461	0.0150785	0.015739	0.643892
wsnp_Ex_c1104_2118684	0.764824	0.955074	0.808969	0.0590355	0.0269627	0.0035461	0.0150785	0.015739	0.643892
wsnp_Ex_c18965_27868480	0.764824	0.955074	0.808969	0.0590355	0.0269627	0.0035461	0.0150785	0.015739	0.643892
wsnp_Ex_c29350_38393488	0.764824	0.955074	0.808969	0.0590355	0.0269627	0.0035461	0.0150785	0.015739	0.643892
wsnp_Ku_c3354_6228863	0.764824	0.955074	0.808969	0.0590355	0.0269627	0.0035461	0.0150785	0.015739	0.643892
wsnp_Ku_c8394_14267750	0.764824	0.955074	0.808969	0.0590355	0.0269627	0.0035461	0.0150785	0.015739	0.643892
AX-94631158	0.892367	0.975745	0.774652	0.0727254	0.0270877	0.00177305	0.0164731	0.017116	0.873016
RAC875_c65707_171	0.598109	0.929537	0.824671	0.0531512	0.0275613	0.00591017	0.0147059	0.0154504	0.503349
wsnp_Ex_c2181_4089788	0.598109	0.929537	0.824671	0.0531512	0.0275613	0.00591017	0.0147059	0.0154504	0.503349
AX-158600321	0.888107	0.977201	0.796244	0.0639741	0.0277879	0.00177305	0.0158459	0.0164849	0.73913
BS00021965_51	0.888107	0.977201	0.796244	0.0639741	0.0277879	0.00177305	0.0158459	0.0164849	0.73913
tplb0047k12_1370	0.911383	0.981573	0.792063	0.0656313	0.0279569	0.00141844	0.0160064	0.0166949	0.741379
BS00016407_51	0.677485	0.940205	0.814596	0.0569004	0.0281516	0.00487589	0.0151183	0.0157977	0.508662
AX-158557929	0.765484	0.957938	0.820645	0.0546384	0.0282075	0.0035461	0.0151209	0.0158254	0.715114
RAC875_rep_c107081_918	0.765484	0.957938	0.820645	0.0546384	0.0282075	0.0035461	0.0151209	0.0158254	0.715114
AX-158567562	0.913723	0.987316	0.852983	0.0430891	0.0282836	0.00141844	0.0164406	0.0170697	0.741379
AX-95244112	0.913723	0.987316	0.852983	0.0430891	0.0282836	0.00141844	0.0164406	0.0170697	0.741379
AX-158525572	0.673412	0.957628	0.870258	0.0372711	0.0283023	0.00496454	0.0152012	0.0158864	0.508217
AX-158558966	0.673412	0.957628	0.870258	0.0372711	0.0283023	0.00496454	0.0152012	0.0158864	0.508217
AX-158556269	0.781352	0.954265	0.790829	0.0661239	0.0284439	0.0035461	0.0162183	0.0168995	0.643892
AX-158559665	0.781352	0.954265	0.790829	0.0661239	0.0284439	0.0035461	0.0162183	0.0168995	0.643892
AX-94386402	0.781352	0.954265	0.790829	0.0661239	0.0284439	0.0035461	0.0162183	0.0168995	0.643892
AX-94756419	0.781352	0.954265	0.790829	0.0661239	0.0284439	0.0035461	0.0162183	0.0168995	0.643892
BS00021659_51	0.781352	0.954265	0.790829	0.0661239	0.0284439	0.0035461	0.0162183	0.0168995	0.643892
BS00059928_51	0.781352	0.954265	0.790829	0.0661239	0.0284439	0.0035461	0.0162183	0.0168995	0.643892
BS00079443_51	0.781352	0.954265	0.790829	0.0661239	0.0284439	0.0035461	0.0162183	0.0168995	0.643892
GENE-4270_242	0.781352	0.954265	0.790829	0.0661239	0.0284439	0.0035461	0.0162183	0.0168995	0.643892
RAC875_c1227_1471	0.781352	0.954265	0.790829	0.0661239	0.0284439	0.0035461	0.0162183	0.0168995	0.643892
RAC875_rep_c105182_460	0.781352	0.954265	0.790829	0.0661239	0.0284439	0.0035461	0.0162183	0.0168995	0.643892
wsnp_CAP11_c1761_958064	0.781352	0.954265	0.790829	0.0661239	0.0284439	0.0035461	0.0162183	0.0168995	0.643892
wsnp_CAP12_c1461_744121	0.781352	0.954265	0.790829	0.0661239	0.0284439	0.0035461	0.0162183	0.0168995	0.643892
wsnp_Ex_c19214_28132186	0.781352	0.954265	0.790829	0.0661239	0.0284439	0.0035461	0.0162183	0.0168995	0.643892
wsnp_Ex_c6059_10615895	0.781352	0.954265	0.790829	0.0661239	0.0284439	0.0035461	0.0162183	0.0168995	0.643892
wsnp_Ex_c7833_13327323	0.781352	0.954265	0.790829	0.0661239	0.0284439	0.0035461	0.0162183	0.0168995	0.643892
wsnp_Ku_c3201_5970486	0.781352	0.954265	0.790829	0.0661239	0.0284439	0.0035461	0.0162183	0.0168995	0.643892
wsnp_Ra_c40910_48252997	0.781352	0.954265	0.790829	0.0661239	0.0284439	0.0035461	0.0162183	0.0168995	0.643892
wsnp_Ra_rep_c105182_89171305	0.781352	0.954265	0.790829	0.0661239	0.0284439	0.0035461	0.0162183	0.0168995	0.643892
wsnp_RFL_Contig1510_707132	0.781352	0.954265	0.790829	0.0661239	0.0284439	0.0035461	0.0162183	0.0168995	0.643892
AX-158567178	0.891453	0.977064	0.788697	0.0669784	0.0285327	0.00177305	0.0163344	0.0170495	0.73913
BS00033795_51	0.891453	0.977064	0.788697	0.0669784	0.0285327	0.00177305	0.0163344	0.0170495	0.73913
RAC875_c79370_378	0.891453	0.977064	0.788697	0.0669784	0.0285327	0.00177305	0.0163344	0.0170495	0.73913
Tdurum_contig78006_158	0.891453	0.977064	0.788697	0.0669784	0.0285327	0.00177305	0.0163344	0.0170495	0.73913
BS00074997_51	0.894264	0.976784	0.780433	0.070335	0.0288594	0.00177305	0.0167686	0.0174243	0.73913
AX-94406390	0.824143	0.988798	0.936299	0.0170088	0.029193	0.00283688	0.0161318	0.0167305	0.586207
BS00063977_51	0.893382	0.97799	0.793565	0.0650341	0.0293803	0.00177305	0.0166299	0.0173579	0.904762
AX-94999423	0.830444	0.989532	0.938264	0.0164496	0.0296394	0.00283688	0.0167312	0.0176056	0.586207
AX-158555683	0.794424	0.953425	0.773444	0.0732298	0.0297014	0.0035461	0.0172495	0.0179495	0.643892
AX-158562058	0.794424	0.953425	0.773444	0.0732298	0.0297014	0.0035461	0.0172495	0.0179495	0.643892
BS00069273_51	0.794424	0.953425	0.773444	0.0732298	0.0297014	0.0035461	0.0172495	0.0179495	0.643892
Tdurum_contig6121_907	0.794424	0.953425	0.773444	0.0732298	0.0297014	0.0035461	0.0172495	0.0179495	0.643892
Tdurum_contig66015_346	0.794424	0.953425	0.773444	0.0732298	0.0297014	0.0035461	0.0172495	0.0179495	0.643892
D_GBUVHFX01API9H_416	0.728175	0.974283	0.905391	0.0261238	0.0297018	0.00472813	0.017394	0.0180722	0.71875
AX-109911820	0.89916	0.987412	0.875173	0.0356578	0.0297691	0.00177305	0.0175827	0.0182533	0.73913
BobWhite_c45623_215	0.89916	0.97635	0.765473	0.0765955	0.0297691	0.00177305	0.0175827	0.0182533	0.73913
BS00037898_51	0.89916	0.97635	0.765473	0.0765955	0.0297691	0.00177305	0.0175827	0.0182533	0.73913
Tdurum_contig31586_197	0.89916	0.97635	0.765473	0.0765955	0.0297691	0.00177305	0.0175827	0.0182533	0.73913
wsnp_Ex_c11439_18459047	0.89916	0.97635	0.765473	0.0765955	0.0297691	0.00177305	0.0175827	0.0182533	0.73913
wsnp_Ex_c5378_9505533	0.89916	0.97635	0.765473	0.0765955	0.0297691	0.00177305	0.0175827	0.0182533	0.73913
AX-108931696	0.898533	0.976641	0.769788	0.0747648	0.0300139	0.00177305	0.0174742	0.0182101	0.73913
AX-158527167	0.898533	0.976641	0.769788	0.0747648	0.0300139	0.00177305	0.0174742	0.0182101	0.73913
AX-94538713	0.898533	0.976641	0.769788	0.0747648	0.0300139	0.00177305	0.0174742	0.0182101	0.73913
Kukri_c2700_1137	0.898533	0.976641	0.769788	0.0747648	0.0300139	0.00177305	0.0174742	0.0182101	0.73913
TA004947-0758	0.898533	0.976641	0.769788	0.0747648	0.0300139	0.00177305	0.0174742	0.0182101	0.73913
Tdurum_contig42125_5692	0.898533	0.976641	0.769788	0.0747648	0.0300139	0.00177305	0.0174742	0.0182101	0.73913
BS00092631_51	0.802635	0.951952	0.756551	0.0804472	0.0300198	0.0035461	0.0179672	0.0187849	0.68871
AX-158542384	0.892877	0.978606	0.800282	0.06239	0.0300411	0.00177305	0.0165515	0.0173238	0.791304
RAC875_c45747_87	0.892877	0.978606	0.800282	0.06239	0.0300411	0.00177305	0.0165515	0.0173238	0.791304
AX-95248867	0.698197	0.957141	0.85799	0.0413786	0.0300721	0.00496454	0.0164496	0.0171574	0.508217
BS00063458_51	0.698197	0.957141	0.85799	0.0413786	0.0300721	0.00496454	0.0164496	0.0171574	0.508217
BS00063460_51	0.698197	0.957141	0.85799	0.0413786	0.0300721	0.00496454	0.0164496	0.0171574	0.508217
CAP7_c7296_88	0.698197	0.957141	0.85799	0.0413786	0.0300721	0.00496454	0.0164496	0.0171574	0.508217
BS00036211_51	0.698197	0.938123	0.794976	0.064475	0.0300721	0.00496454	0.0164496	0.0171574	0.508217
BS00064632_51	0.698197	0.938123	0.794976	0.064475	0.0300721	0.00496454	0.0164496	0.0171574	0.508217
BS00086046_51	0.698197	0.938123	0.794976	0.064475	0.0300721	0.00496454	0.0164496	0.0171574	0.508217
IAAV5967	0.698197	0.938123	0.794976	0.064475	0.0300721	0.00496454	0.0164496	0.0171574	0.508217
Kukri_c38882_391	0.698197	0.938123	0.794976	0.064475	0.0300721	0.00496454	0.0164496	0.0171574	0.508217
TA002574-0890	0.698197	0.938123	0.794976	0.064475	0.0300721	0.00496454	0.0164496	0.0171574	0.508217
wsnp_Ku_c1549_3054996	0.698197	0.938123	0.794976	0.064475	0.0300721	0.00496454	0.0164496	0.0171574	0.508217
AX-109363759	0.90305	0.975899	0.751411	0.0827072	0.0305336	0.00177305	0.0182883	0.0189717	0.73913
BS00036352_51	0.90305	0.975899	0.751411	0.0827072	0.0305336	0.00177305	0.0182883	0.0189717	0.73913
wsnp_Ex_c5457_9632050	0.90305	0.975899	0.751411	0.0827072	0.0305336	0.00177305	0.0182883	0.0189717	0.73913
AX-95015593	0.923565	0.986842	0.827854	0.0519858	0.0305892	0.00141844	0.0185574	0.019225	0.741379
BS00064146_51	0.923565	0.986842	0.827854	0.0519858	0.0305892	0.00141844	0.0185574	0.019225	0.741379
Tdurum_contig25513_123	0.923565	0.986842	0.827854	0.0519858	0.0305892	0.00141844	0.0185574	0.019225	0.741379
AX-158541281	0.804862	0.952553	0.756852	0.0803154	0.0307729	0.0035461	0.0181723	0.018889	0.643892
AX-158541564	0.804862	0.952553	0.756852	0.0803154	0.0307729	0.0035461	0.0181723	0.018889	0.643892
AX-158572374	0.804862	0.952553	0.756852	0.0803154	0.0307729	0.0035461	0.0181723	0.018889	0.643892
BobWhite_c9424_243	0.804862	0.952553	0.756852	0.0803154	0.0307729	0.0035461	0.0181723	0.018889	0.643892
BS00038663_51	0.804862	0.952553	0.756852	0.0803154	0.0307729	0.0035461	0.0181723	0.018889	0.643892
BS00038664_51	0.804862	0.952553	0.756852	0.0803154	0.0307729	0.0035461	0.0181723	0.018889	0.643892
Tdurum_contig13548_158	0.804862	0.952553	0.756852	0.0803154	0.0307729	0.0035461	0.0181723	0.018889	0.643892
Tdurum_contig27887_55	0.804862	0.952553	0.756852	0.0803154	0.0307729	0.0035461	0.0181723	0.018889	0.643892
tplb0059m03_622	0.804862	0.952553	0.756852	0.0803154	0.0307729	0.0035461	0.0181723	0.018889	0.643892
wsnp_BG607088A_Ta_1_1	0.804862	0.952553	0.756852	0.0803154	0.0307729	0.0035461	0.0181723	0.018889	0.643892
Jagger_c10188_98	0.900221	0.977603	0.775534	0.0723586	0.0308615	0.00177305	0.0177697	0.0185184	0.904762
AX-158563564	0.906115	0.97543	0.738299	0.0886161	0.031165	0.00177305	0.0188854	0.0195796	0.73913
AX-110990896	0.904188	0.976202	0.751618	0.0826159	0.0312714	0.00177305	0.0185055	0.0192601	0.73913
AX-158538654	0.904188	0.976202	0.751618	0.0826159	0.0312714	0.00177305	0.0185055	0.0192601	0.73913
Tdurum_contig33207_282	0.904188	0.976202	0.751618	0.0826159	0.0312714	0.00177305	0.0185055	0.0192601	0.73913
RAC875_c30381_573	0.767907	0.983323	0.928145	0.0193544	0.0312715	0.00378251	0.0162973	0.0171016	0.651116
RFL_Contig1675_153	0.454767	0.863583	0.749801	0.0834219	0.0313156	0.0101317	0.0185823	0.0193664	0.403823
AX-158527857	0.698974	0.942003	0.807335	0.059661	0.0313169	0.00496454	0.0164921	0.0172438	0.590181
CAP11_c989_113	0.698974	0.942003	0.807335	0.059661	0.0313169	0.00496454	0.0164921	0.0172438	0.590181
CAP7_c2381_149	0.698974	0.942003	0.807335	0.059661	0.0313169	0.00496454	0.0164921	0.0172438	0.590181
AX-111521612	0.908482	0.974942	0.726192	0.0942617	0.0316717	0.00177305	0.0193739	0.020077	0.73913
BS00091257_51	0.908482	0.974942	0.726192	0.0942617	0.0316717	0.00177305	0.0193739	0.020077	0.73913
wsnp_Ex_c13284_20948460	0.908482	0.974942	0.726192	0.0942617	0.0316717	0.00177305	0.0193739	0.020077	0.73913
Tdurum_contig53926_455	0.81323	0.951645	0.7411	0.0873366	0.0316826	0.0035461	0.0189864	0.019718	0.643892
AX-158534488	0.898465	0.978315	0.786427	0.0678936	0.0317417	0.00177305	0.0174624	0.0181739	0.791304
wsnp_Ex_c2288_4293430	0.824061	0.977356	0.871297	0.0369286	0.0319688	0.00319149	0.0181397	0.0188428	0.584408
wsnp_BE403421A_Ta_2_1	0.639913	0.921711	0.782584	0.0694547	0.0321739	0.00638298	0.0177262	0.0184781	0.500828
AX-89711353	0.900993	0.978241	0.780224	0.0704208	0.0322377	0.00177305	0.0179084	0.0187054	0.791304
RAC875_c17197_504	0.900993	0.978241	0.780224	0.0704208	0.0322377	0.00177305	0.0179084	0.0187054	0.791304
BS00099729_51	0.908738	0.975745	0.734228	0.0904938	0.0323429	0.00177305	0.0194282	0.0201996	0.73913
Excalibur_c97201_294	0.903766	0.980712	0.79957	0.062668	0.0323531	0.00177305	0.0184244	0.0194091	0.791304
IAAV3972	0.903766	0.980712	0.79957	0.062668	0.0323531	0.00177305	0.0184244	0.0194091	0.791304
Kukri_rep_c105119_190	0.903766	0.980712	0.79957	0.062668	0.0323531	0.00177305	0.0184244	0.0194091	0.791304
RAC875_c6409_476	0.903766	0.980712	0.79957	0.062668	0.0323531	0.00177305	0.0184244	0.0194091	0.791304
wsnp_Ex_c658_1294003	0.903766	0.980712	0.79957	0.062668	0.0323531	0.00177305	0.0184244	0.0194091	0.791304
Tdurum_contig30558_109	0.801903	0.956605	0.780939	0.0701272	0.0324375	0.0035461	0.0179009	0.0186659	0.715114
AX-158525919	0.819922	0.950701	0.726233	0.0942423	0.0324471	0.0035461	0.019692	0.0204364	0.643892
BS00068106_51	0.819922	0.950701	0.726233	0.0942423	0.0324471	0.0035461	0.019692	0.0204364	0.643892
wsnp_Ku_rep_c101212_88410320	0.819922	0.950701	0.726233	0.0942423	0.0324471	0.0035461	0.019692	0.0204364	0.643892
AX-109883040	0.840114	0.969956	0.812093	0.0578467	0.0325027	0.00319149	0.019961	0.0206897	0.646141
AX-110940891	0.840114	0.969956	0.812093	0.0578467	0.0325027	0.00319149	0.019961	0.0206897	0.646141
AX-111141635	0.840114	0.969956	0.812093	0.0578467	0.0325027	0.00319149	0.019961	0.0206897	0.646141
AX-111509567	0.840114	0.969956	0.812093	0.0578467	0.0325027	0.00319149	0.019961	0.0206897	0.646141
AX-111539931	0.840114	0.969956	0.812093	0.0578467	0.0325027	0.00319149	0.019961	0.0206897	0.646141
AX-158525569	0.840114	0.969956	0.812093	0.0578467	0.0325027	0.00319149	0.019961	0.0206897	0.646141
AX-89422431	0.840114	0.969956	0.812093	0.0578467	0.0325027	0.00319149	0.019961	0.0206897	0.646141
Tdurum_contig12066_126	0.840114	0.969956	0.812093	0.0578467	0.0325027	0.00319149	0.019961	0.0206897	0.646141
tplb0027f13_1493	0.840114	0.969956	0.812093	0.0578467	0.0325027	0.00319149	0.019961	0.0206897	0.646141
AX-110434151	0.754666	0.940216	0.756316	0.0805497	0.0325961	0.00472813	0.0192722	0.0201013	0.71875
TA006422-1750	0.541158	0.902249	0.786961	0.0676777	0.0326148	0.00827423	0.0180329	0.0189179	0.490114
RAC875_c56535_256	0.831618	0.977147	0.864279	0.0392584	0.0328785	0.00319149	0.0189539	0.0196717	0.584408
AX-158537982	0.679683	0.925851	0.768513	0.0753037	0.033009	0.00591017	0.018451	0.0192636	0.503349
BS00031073_51	0.825221	0.949717	0.712303	0.100974	0.0330784	0.0035461	0.0202891	0.0210443	0.643892
Tdurum_contig8348_831	0.825221	0.949717	0.712303	0.100974	0.0330784	0.0035461	0.0202891	0.0210443	0.643892
Excalibur_c2171_2728	0.808157	0.958371	0.783008	0.0692816	0.0332092	0.0035461	0.0184843	0.0194325	0.715114
IAAV7226	0.808157	0.958371	0.783008	0.0692816	0.0332092	0.0035461	0.0184843	0.0194325	0.715114
AX-158538667	0.912409	0.97527	0.717662	0.0983534	0.0332526	0.00177305	0.0202423	0.0210285	0.73913
BS00099804_51	0.912409	0.97527	0.717662	0.0983534	0.0332526	0.00177305	0.0202423	0.0210285	0.73913
BS00106144_51	0.912409	0.97527	0.717662	0.0983534	0.0332526	0.00177305	0.0202423	0.0210285	0.73913
BobWhite_c26374_339	0.80043	0.959189	0.795504	0.0642663	0.0334188	0.0035461	0.0177687	0.0185644	0.762595
AX-89465561	0.786413	0.9767	0.890909	0.0306123	0.0335909	0.00378251	0.0177095	0.0185827	0.651116
Kukri_c40149_436	0.57662	0.976646	0.944838	0.0145956	0.033816	0.0072695	0.0171702	0.0178376	0.402984
wsnp_Ex_c54357_57265797	0.769877	0.94376	0.755608	0.0808595	0.0338337	0.00443262	0.0192619	0.0200839	0.577971
AX-158559574	0.821157	0.960739	0.780471	0.0703193	0.0342665	0.0035461	0.019828	0.0208738	0.715114
BS00022747_51	0.821157	0.960739	0.780471	0.0703193	0.0342665	0.0035461	0.019828	0.0208738	0.715114
AX-158568213	1	1	0.795143	0.0644089	0.0343336	0	0.0210416	0.0219364	1
tplb0050h15_1287	0.934651	0.984648	0.765085	0.076761	0.0345794	0.00141844	0.0217054	0.0224976	0.741379
wsnp_Ex_c2148_4035913	0.934651	0.984648	0.765085	0.076761	0.0345794	0.00141844	0.0217054	0.0224976	0.741379
wsnp_Ex_c32003_40728918	0.934651	0.984648	0.765085	0.076761	0.0345794	0.00141844	0.0217054	0.0224976	0.741379
AX-158601093	0.917705	0.974258	0.687199	0.113796	0.0346485	0.00177305	0.021545	0.0223548	0.73913
Tdurum_contig8028_870	0.917705	0.974258	0.687199	0.113796	0.0346485	0.00177305	0.021545	0.0223548	0.73913
AX-95205191	0.779209	0.942745	0.740685	0.0875255	0.0347434	0.00443262	0.0200761	0.0209129	0.577971
Tdurum_contig10107_580	0.779209	0.942745	0.740685	0.0875255	0.0347434	0.00443262	0.0200761	0.0209129	0.577971
wsnp_BQ159467B_Ta_2_2	0.779209	0.942745	0.740685	0.0875255	0.0347434	0.00443262	0.0200761	0.0209129	0.577971
AX-94435238	0.62415	0.918249	0.782489	0.0694932	0.0348255	0.006974	0.0185553	0.0193774	0.471045
AX-94932563	0.443455	0.916804	0.850513	0.0439403	0.0348872	0.010461	0.0187963	0.0197078	0.399632
Kukri_rep_c73477_888	0.443455	0.881148	0.786448	0.0678851	0.0348872	0.010461	0.0187963	0.0197078	0.399632
wsnp_Ku_c18538_27857915	0.910147	0.978842	0.764523	0.0770012	0.0349791	0.00177305	0.0197327	0.0208115	0.791304
Excalibur_c25599_358	0.848923	0.970083	0.801973	0.061731	0.0351695	0.00319149	0.021125	0.0218823	0.584408
AX-95025823	0.740041	0.940062	0.769433	0.0749146	0.0352834	0.00496454	0.0190974	0.0198965	0.590181
BS00039187_51	0.610864	0.904205	0.753826	0.0816417	0.0353605	0.00780142	0.0200481	0.0208614	0.492892
Tdurum_contig9731_121	0.429619	0.913325	0.848041	0.0447972	0.0353925	0.0109338	0.0191693	0.0201959	0.397317
Kukri_c8718_193	0.701035	0.925765	0.751693	0.0825824	0.0354493	0.00602837	0.0201642	0.0210114	0.569082
tplb0041o08_752	0.764302	0.954514	0.807016	0.0597831	0.0355566	0.00496454	0.0210632	0.0218549	0.508217
AX-158554053	0.702249	0.947004	0.822013	0.0541315	0.0357056	0.00614657	0.0206434	0.0215197	0.568103
RAC875_c48766_224	0.702249	0.947004	0.822013	0.0541315	0.0357056	0.00614657	0.0206434	0.0215197	0.568103
BS00041911_51	0.828181	0.959743	0.7657	0.0764986	0.0358397	0.0035461	0.0206386	0.0215112	0.715114
AX-158534553	0.938962	0.984762	0.750343	0.0831809	0.0359247	0.00141844	0.0232388	0.0241527	0.741379
BobWhite_rep_c63956_254	0.938962	0.984762	0.750343	0.0831809	0.0359247	0.00141844	0.0232388	0.0241527	0.741379
AX-158597291	0.840565	0.973817	0.835779	0.0491221	0.0360305	0.00319149	0.0200175	0.0209021	0.653673
Kukri_c11120_462	0.795206	0.938834	0.701328	0.106467	0.0361427	0.00443262	0.0216443	0.0224706	0.577971
Tdurum_contig3182_132	0.795206	0.938834	0.701328	0.106467	0.0361427	0.00443262	0.0216443	0.0224706	0.577971
Tdurum_contig97351_247	0.795206	0.938834	0.701328	0.106467	0.0361427	0.00443262	0.0216443	0.0224706	0.577971
wsnp_Ex_c2171_4074003	0.749967	0.94259	0.770391	0.0745104	0.0363187	0.00496454	0.0198555	0.0208509	0.590181
AX-158538980	0.915053	0.978485	0.746727	0.0847943	0.0364603	0.00177305	0.0208725	0.021972	0.791304
BobWhite_c42349_99	0.915053	0.978485	0.746727	0.0847943	0.0364603	0.00177305	0.0208725	0.021972	0.791304
IAAV8536	0.915053	0.978485	0.746727	0.0847943	0.0364603	0.00177305	0.0208725	0.021972	0.791304
BS00105409_51	0.919389	0.989992	0.875853	0.0354359	0.0364776	0.00177305	0.0219951	0.023318	0.791304
Ku_c3676_1280	0.740367	0.983034	0.934653	0.017479	0.0367533	0.00549645	0.0211701	0.0218673	0.477395
Excalibur_c35289_64	0.92171	0.989938	0.871484	0.036867	0.0367783	0.00177305	0.0226471	0.0236279	0.904762
AX-95022624	0.913006	0.979562	0.765062	0.0767708	0.0369578	0.00177305	0.0203813	0.0213551	0.826087
AX-110557549	0.812707	0.951917	0.743275	0.0863491	0.0369732	0.00425532	0.0227201	0.0233868	0.722222
BobWhite_c11539_336	0.480927	0.879254	0.767382	0.075783	0.0370838	0.010461	0.0201532	0.0210893	0.399632
IAAV8190	0.857006	0.970333	0.792527	0.0654468	0.0371266	0.00319149	0.0223191	0.0231654	0.584408
Excalibur_c74466_344	0.765815	0.960819	0.832694	0.0502302	0.037376	0.00496454	0.0211992	0.0222923	0.590181
AX-95094547	0.765815	0.945804	0.768577	0.0752762	0.037376	0.00496454	0.0211992	0.0222923	0.590181
AX-158555403	0.837981	0.967643	0.800288	0.0623876	0.0376095	0.0035461	0.021887	0.0227823	0.715114
RAC875_c2529_1483	0.837981	0.967643	0.800288	0.0623876	0.0376095	0.0035461	0.021887	0.0227823	0.715114
wsnp_Ku_c17659_26797674	0.837981	0.967643	0.800288	0.0623876	0.0376095	0.0035461	0.021887	0.0227823	0.715114
Ex_c67202_741	0.837981	0.959102	0.747572	0.0844161	0.0376095	0.0035461	0.021887	0.0227823	0.715114
Kukri_c26288_419	0.855242	0.978849	0.853886	0.042779	0.0376191	0.00319149	0.022047	0.0229844	0.716913
AX-158555838	0.920266	0.977798	0.721554	0.0964744	0.0377855	0.00177305	0.022237	0.0232178	0.791304
AX-94407975	0.920266	0.977798	0.721554	0.0964744	0.0377855	0.00177305	0.022237	0.0232178	0.791304
BobWhite_c24718_225	0.920266	0.977798	0.721554	0.0964744	0.0377855	0.00177305	0.022237	0.0232178	0.791304
BS00030430_51	0.920266	0.977798	0.721554	0.0964744	0.0377855	0.00177305	0.022237	0.0232178	0.791304
Kukri_rep_c114738_144	0.920266	0.977798	0.721554	0.0964744	0.0377855	0.00177305	0.022237	0.0232178	0.791304
RAC875_c2044_170	0.920266	0.977798	0.721554	0.0964744	0.0377855	0.00177305	0.022237	0.0232178	0.791304
RAC875_c32792_231	0.920266	0.977798	0.721554	0.0964744	0.0377855	0.00177305	0.022237	0.0232178	0.791304
Tdurum_contig9132_102	0.920266	0.977798	0.721554	0.0964744	0.0377855	0.00177305	0.022237	0.0232178	0.791304
wsnp_BQ159467B_Ta_2_1	0.920266	0.977798	0.721554	0.0964744	0.0377855	0.00177305	0.022237	0.0232178	0.791304
CAP7_c3847_204	0.92099	0.979698	0.743048	0.086452	0.0380332	0.00177305	0.0224409	0.023566	0.791304
BS00068469_51	0.764757	0.941657	0.751988	0.0824522	0.0380885	0.00496454	0.0211039	0.022122	0.590181
BS00015136_51	0.802365	0.965527	0.825572	0.0528205	0.0381829	0.00443262	0.0224283	0.0233436	0.710476
wsnp_RFL_Contig4307_5006558	0.845397	0.966717	0.784717	0.0685861	0.0382897	0.0035461	0.0229368	0.0237834	0.715114
AX-95154560	0.845397	0.961848	0.753224	0.0819067	0.0382897	0.0035461	0.0229368	0.0237834	0.715114
Ku_c12469_837	0.70784	0.946395	0.816523	0.0561762	0.0385219	0.00620567	0.0212407	0.0222143	0.584817
wsnp_Ex_c2920_5385184	0.922718	0.977404	0.707614	0.1033	0.03855	0.00177305	0.0229426	0.0239363	0.791304
Kukri_c22553_60	0.658075	0.899019	0.70467	0.104776	0.0385992	0.00780142	0.0228162	0.0236798	0.492892
AX-158544024	0.863981	0.990133	0.927456	0.0195545	0.0387442	0.00283688	0.0208565	0.0216163	0.704433
BS00022522_51	0.863981	0.990133	0.927456	0.0195545	0.0387442	0.00283688	0.0208565	0.0216163	0.704433
BS00083578_51	0.863981	0.990133	0.927456	0.0195545	0.0387442	0.00283688	0.0208565	0.0216163	0.704433
BS00022422_51	0.922325	0.977734	0.713339	0.100465	0.0387893	0.00177305	0.0228265	0.0239615	0.791304
Kukri_c44_1704	0.922325	0.977734	0.713339	0.100465	0.0387893	0.00177305	0.0228265	0.0239615	0.791304
AX-158557545	0.846204	0.967077	0.785933	0.0680932	0.0389272	0.0035461	0.0230572	0.0242496	0.715114
AX-111094478	0.846001	0.958439	0.730122	0.0924087	0.0390907	0.0035461	0.0230268	0.0239428	0.715114
AX-94554383	0.776283	0.960372	0.822865	0.0538166	0.0390936	0.00496454	0.0221912	0.0230465	0.590181
wsnp_Ex_c21092_30220342	0.862703	0.979717	0.852271	0.0433339	0.0391385	0.00319149	0.0232451	0.0243324	0.716913
BS00062967_51	0.155378	0.908266	0.89139	0.0304609	0.0391646	0.0183806	0.0217619	0.022858	0.0866471
RAC875_c1638_165	0.155378	0.908266	0.89139	0.0304609	0.0391646	0.0183806	0.0217619	0.022858	0.0866471
TGWA25K-TG0205	0.155378	0.908266	0.89139	0.0304609	0.0391646	0.0183806	0.0217619	0.022858	0.0866471
AX-109856494	0.923387	0.983587	0.785762	0.0681624	0.0391795	0.00177305	0.0231429	0.0240928	0.791304
AX-158521490	0.923387	0.983587	0.785762	0.0681624	0.0391795	0.00177305	0.0231429	0.0240928	0.791304
BS00039749_51	0.924251	0.985564	0.809418	0.058864	0.039292	0.00177305	0.023407	0.0247885	0.92381
AX-158592717	0.94039	0.988191	0.801894	0.0617618	0.039554	0.00141844	0.0237954	0.0248572	0.793103
AX-158592724	0.94039	0.988191	0.801894	0.0617618	0.039554	0.00141844	0.0237954	0.0248572	0.793103
Kukri_c12901_706	0.94039	0.988191	0.801894	0.0617618	0.039554	0.00141844	0.0237954	0.0248572	0.793103
wsnp_Ex_c45195_51056617	0.94039	0.988191	0.801894	0.0617618	0.039554	0.00141844	0.0237954	0.0248572	0.793103
wsnp_Ku_c16895_25861847	0.94039	0.988191	0.801894	0.0617618	0.039554	0.00141844	0.0237954	0.0248572	0.793103
AX-95147740	0.925	0.977337	0.697822	0.108258	0.039699	0.00177305	0.0236407	0.0247905	0.791304
BS00099367_51	0.921311	0.981505	0.76496	0.0768143	0.039746	0.00177305	0.0225323	0.0236295	0.826087
Excalibur_c74397_238	0.861714	0.977147	0.834742	0.0494939	0.0397493	0.00319149	0.023079	0.023925	0.653673
AX-109395546	0.940862	0.991029	0.848309	0.0447038	0.0399215	0.00141844	0.0239851	0.0252055	0.793103
CAP7_c7065_166	0.940862	0.991029	0.848309	0.0447038	0.0399215	0.00141844	0.0239851	0.0252055	0.793103
BS00023645_51	0.726994	0.923013	0.718005	0.0981871	0.039953	0.0070922	0.0259781	0.0270159	0.572464
IACX11401	0.726994	0.923013	0.718005	0.0981871	0.039953	0.0070922	0.0259781	0.0270159	0.572464
AX-158565048	0.720793	0.928027	0.742223	0.0868262	0.0399533	0.00620567	0.0222261	0.0233631	0.584817
AX-158564840	0.929825	0.978241	0.689931	0.112355	0.0399619	0.00177305	0.025266	0.0264556	0.904762
Excalibur_c15031_73	0.476655	0.86756	0.746935	0.0847011	0.0400046	0.0118203	0.0225861	0.0238114	0.448111
Ra_c2110_494	0.476655	0.86756	0.746935	0.0847011	0.0400046	0.0118203	0.0225861	0.0238114	0.448111
RAC875_c15649_1101	0.476655	0.86756	0.746935	0.0847011	0.0400046	0.0118203	0.0225861	0.0238114	0.448111
AX-158544022	0.871207	0.989678	0.919855	0.0217821	0.040062	0.00283688	0.0220267	0.0230837	0.704433
BS00035533_51	0.739605	0.962539	0.856139	0.0420085	0.040239	0.00582573	0.0223727	0.0234737	0.652791
AX-111513035	0.931156	0.984652	0.777063	0.0717242	0.0404481	0.00177305	0.0257545	0.0267012	0.904762
RAC875_rep_c105906_124	0.928628	0.981866	0.745927	0.0851532	0.0405144	0.00177305	0.0248423	0.0258705	0.791304
RFL_Contig785_535	0.870345	0.981642	0.858412	0.0412356	0.0405191	0.00319149	0.0246153	0.0256543	0.716913
Tdurum_contig52086_129	0.870345	0.981642	0.858412	0.0412356	0.0405191	0.00319149	0.0246153	0.0256543	0.716913
Kukri_c67545_299	0.807081	0.951143	0.746746	0.0847857	0.0406703	0.00443262	0.0229767	0.0239772	0.648309
AX-158526361	0.822933	0.95651	0.754387	0.0813949	0.0409118	0.00443262	0.0250336	0.0259962	0.710476
wsnp_Ex_c51661_55533018	0.923905	0.984958	0.802327	0.0615938	0.0409374	0.00177305	0.0233006	0.0244482	0.826087
wsnp_Ex_rep_c103248_88252281	0.923905	0.984958	0.802327	0.0615938	0.0409374	0.00177305	0.0233006	0.0244482	0.826087
wsnp_Ex_rep_c69928_68889568	0.923905	0.984958	0.802327	0.0615938	0.0409374	0.00177305	0.0233006	0.0244482	0.826087
wsnp_JD_c21530_18862705	0.923905	0.984958	0.802327	0.0615938	0.0409374	0.00177305	0.0233006	0.0244482	0.826087
wsnp_Ku_rep_c71678_71421327	0.923905	0.984958	0.802327	0.0615938	0.0409374	0.00177305	0.0233006	0.0244482	0.826087
BobWhite_c14915_156	0.923905	0.980323	0.741412	0.0871946	0.0409374	0.00177305	0.0233006	0.0244482	0.826087
AX-110951890	0.942707	0.989468	0.81617	0.0563088	0.0409591	0.00141844	0.0247576	0.025647	0.793103
AX-109901444	0.925196	0.985916	0.811724	0.0579866	0.0410637	0.00177305	0.0237025	0.0250968	0.826087
RAC875_c4108_2179	0.925196	0.985916	0.811724	0.0579866	0.0410637	0.00177305	0.0237025	0.0250968	0.826087
RFL_Contig304_729	0.925196	0.985916	0.811724	0.0579866	0.0410637	0.00177305	0.0237025	0.0250968	0.826087
wsnp_RFL_Contig3529_3696847	0.925196	0.985916	0.811724	0.0579866	0.0410637	0.00177305	0.0237025	0.0250968	0.826087
GENE-0676_322	0.928917	0.982318	0.751242	0.0827821	0.0410948	0.00177305	0.0249433	0.0261168	0.791304
TA001167-0831	0.928917	0.982318	0.751242	0.0827821	0.0410948	0.00177305	0.0249433	0.0261168	0.791304
tplb0060e06_1793	0.928917	0.982318	0.751242	0.0827821	0.0410948	0.00177305	0.0249433	0.0261168	0.791304
wsnp_JD_c16948_15934352	0.928917	0.982318	0.751242	0.0827821	0.0410948	0.00177305	0.0249433	0.0261168	0.791304
wsnp_Ku_c850_1758318	0.928917	0.982318	0.751242	0.0827821	0.0410948	0.00177305	0.0249433	0.0261168	0.791304
Excalibur_c21663_145	0.700687	0.920678	0.734987	0.0901422	0.0411616	0.00762411	0.0254721	0.0264596	0.46329
AX-109326625	0.721325	0.950036	0.820709	0.0546148	0.0411982	0.00620567	0.0222685	0.0234495	0.644129
wsnp_Ex_c1146_2200823	0.85996	0.957011	0.693023	0.110739	0.0412902	0.0035461	0.0253221	0.0265724	0.750968
BobWhite_c19945_341	0.850011	0.96112	0.740783	0.0874808	0.041459	0.0035461	0.0236424	0.0246369	0.762595
BS00011261_51	0.928402	0.985407	0.796177	0.0640005	0.0414886	0.00177305	0.0247639	0.0261701	0.92381
AX-109979251	0.930282	0.982554	0.749759	0.0834405	0.0416015	0.00177305	0.0254318	0.0266142	0.791304
GENE-2383_730	0.930282	0.982554	0.749759	0.0834405	0.0416015	0.00177305	0.0254318	0.0266142	0.791304
Kukri_c3688_407	0.930282	0.982554	0.749759	0.0834405	0.0416015	0.00177305	0.0254318	0.0266142	0.791304
wsnp_Ex_c63909_62932437	0.930282	0.982554	0.749759	0.0834405	0.0416015	0.00177305	0.0254318	0.0266142	0.791304
wsnp_Ex_c63909_62932669	0.930282	0.982554	0.749759	0.0834405	0.0416015	0.00177305	0.0254318	0.0266142	0.791304
wsnp_Ex_c63909_62932893	0.930282	0.982554	0.749759	0.0834405	0.0416015	0.00177305	0.0254318	0.0266142	0.791304
wsnp_Ku_c3688_6797159	0.930282	0.982554	0.749759	0.0834405	0.0416015	0.00177305	0.0254318	0.0266142	0.791304
AX-158563573	0.513515	0.915614	0.826539	0.0524659	0.0416067	0.0106383	0.0218677	0.022812	0.424437
AX-94796636	0.513515	0.915614	0.826539	0.0524659	0.0416067	0.0106383	0.0218677	0.022812	0.424437
AX-158540802	0.85185	0.973074	0.81825	0.05553	0.0416595	0.0035461	0.0239359	0.0250942	0.762595
AX-94702400	0.85185	0.973074	0.81825	0.05553	0.0416595	0.0035461	0.0239359	0.0250942	0.762595
BS00062843_51	0.85185	0.973074	0.81825	0.05553	0.0416595	0.0035461	0.0239359	0.0250942	0.762595
Kukri_rep_c104727_91	0.85185	0.973074	0.81825	0.05553	0.0416595	0.0035461	0.0239359	0.0250942	0.762595
RAC875_c13116_541	0.85185	0.973074	0.81825	0.05553	0.0416595	0.0035461	0.0239359	0.0250942	0.762595
wsnp_Ex_rep_c68113_66877517	0.85185	0.973074	0.81825	0.05553	0.0416595	0.0035461	0.0239359	0.0250942	0.762595
wsnp_Ex_c2887_5330426	0.85185	0.962384	0.746092	0.0850792	0.0416595	0.0035461	0.0239359	0.0250942	0.762595
Kukri_c7169_105	0.849232	0.969928	0.800538	0.0622901	0.0416715	0.0035461	0.0235203	0.0246031	0.762595
Kukri_rep_c68068_95	0.785353	0.946244	0.74956	0.0835292	0.0421411	0.00557244	0.025961	0.027153	0.717523
BS00037006_51	0.868628	0.965078	0.734178	0.0905168	0.042169	0.00319149	0.0242935	0.0254753	0.786087
AX-111128855	0.898219	0.983525	0.838128	0.0482839	0.0422208	0.00265957	0.0261305	0.0275101	0.941818
Tdurum_contig74972_652	0.898219	0.983525	0.838128	0.0482839	0.0422208	0.00265957	0.0261305	0.0275101	0.941818
wsnp_Ku_c792_1636348	0.898219	0.983525	0.838128	0.0482839	0.0422208	0.00265957	0.0261305	0.0275101	0.941818
AX-158527841	0.845994	0.961602	0.750672	0.0830349	0.0423268	0.0035461	0.0230258	0.0241818	0.79651
wsnp_CAP11_rep_c8811_3803397	0.845994	0.961602	0.750672	0.0830349	0.0423268	0.0035461	0.0230258	0.0241818	0.79651
AX-94542146	0.946273	0.987906	0.774898	0.0726231	0.0423662	0.00141844	0.0264007	0.0275099	0.793103
wsnp_Ku_c16295_25149034	0.946273	0.987644	0.770023	0.0746654	0.0423662	0.00141844	0.0264007	0.0275099	0.793103
AX-158553999	0.88838	0.989838	0.908959	0.02504	0.0423686	0.00283688	0.0254155	0.0264478	0.655172
TA001263-0453	0.86489	0.963132	0.727129	0.0938179	0.0424279	0.0035461	0.026246	0.0273352	0.715114
BS00010811_51	0.853	0.976917	0.84297	0.0465703	0.0425631	0.0035461	0.0241231	0.025256	0.762595
RAC875_rep_c114561_587	0.853	0.976917	0.84297	0.0465703	0.0425631	0.0035461	0.0241231	0.025256	0.762595
Tdurum_contig51717_1582	0.853	0.976917	0.84297	0.0465703	0.0425631	0.0035461	0.0241231	0.025256	0.762595
Tdurum_contig28884_302	0.775372	0.976662	0.896105	0.0289851	0.0426273	0.00549645	0.0244692	0.0252695	0.552053
AX-110390853	0.811574	0.963864	0.808221	0.0593214	0.0427682	0.00443262	0.0235244	0.02476	0.698551
AX-110503145	0.327089	0.830013	0.747386	0.0844993	0.0429035	0.0157801	0.0234506	0.0246723	0.322133
Kukri_c2706_1424	0.858756	0.977883	0.843414	0.0464142	0.0429772	0.0035461	0.0251061	0.0265615	0.762595
AX-158526462	0.858756	0.971484	0.798112	0.0632393	0.0429772	0.0035461	0.0251061	0.0265615	0.762595
AX-158527592	0.858756	0.971484	0.798112	0.0632393	0.0429772	0.0035461	0.0251061	0.0265615	0.762595
AX-158548273	0.858756	0.971484	0.798112	0.0632393	0.0429772	0.0035461	0.0251061	0.0265615	0.762595
AX-94723934	0.858756	0.971484	0.798112	0.0632393	0.0429772	0.0035461	0.0251061	0.0265615	0.762595
BS00010988_51	0.858756	0.971484	0.798112	0.0632393	0.0429772	0.0035461	0.0251061	0.0265615	0.762595
BS00087427_51	0.858756	0.971484	0.798112	0.0632393	0.0429772	0.0035461	0.0251061	0.0265615	0.762595
Ra_c3129_2015	0.858756	0.971484	0.798112	0.0632393	0.0429772	0.0035461	0.0251061	0.0265615	0.762595
wsnp_Ra_c7615_13070849	0.858756	0.971484	0.798112	0.0632393	0.0429772	0.0035461	0.0251061	0.0265615	0.762595
AX-158525404	0.932421	0.978091	0.675804	0.11993	0.0429898	0.00177305	0.0262367	0.0272428	0.791304
AX-94457721	0.449168	0.955865	0.919876	0.0217758	0.0430304	0.0124113	0.022532	0.0234994	0.459633
Excalibur_c7338_242	0.449168	0.955865	0.919876	0.0217758	0.0430304	0.0124113	0.022532	0.0234994	0.459633
Kukri_c11959_587	0.449168	0.955865	0.919876	0.0217758	0.0430304	0.0124113	0.022532	0.0234994	0.459633
Excalibur_rep_c111297_98	0.688817	0.908882	0.707189	0.103512	0.0430625	0.00851064	0.0273493	0.0284344	0.451074
AX-95631713	0.946614	0.993352	0.875467	0.0355618	0.0430867	0.00141844	0.0265696	0.0280847	0.793103
AX-110020452	0.928093	0.984787	0.788428	0.0670865	0.043134	0.00177305	0.0246575	0.0258298	0.826087
BS00033372_51	0.8423	0.969996	0.80974	0.058741	0.0431409	0.00378251	0.0239855	0.0251244	0.700956
RAC875_c79857_301	0.929618	0.980867	0.72816	0.0933313	0.0432295	0.00177305	0.0251918	0.0264047	0.826087
AX-111512776	0.929246	0.985767	0.798843	0.0629527	0.0432603	0.00177305	0.0250594	0.0264784	0.826087
AX-158538484	0.929246	0.985767	0.798843	0.0629527	0.0432603	0.00177305	0.0250594	0.0264784	0.826087
AX-158570571	0.929246	0.985767	0.798843	0.0629527	0.0432603	0.00177305	0.0250594	0.0264784	0.826087
BobWhite_c20876_475	0.929246	0.985767	0.798843	0.0629527	0.0432603	0.00177305	0.0250594	0.0264784	0.826087
BS00066466_51	0.929246	0.985767	0.798843	0.0629527	0.0432603	0.00177305	0.0250594	0.0264784	0.826087
Excalibur_c37787_925	0.929246	0.985767	0.798843	0.0629527	0.0432603	0.00177305	0.0250594	0.0264784	0.826087
RAC875_c3138_224	0.929246	0.985767	0.798843	0.0629527	0.0432603	0.00177305	0.0250594	0.0264784	0.826087
RAC875_c50787_146	0.929246	0.985767	0.798843	0.0629527	0.0432603	0.00177305	0.0250594	0.0264784	0.826087
RAC875_c86306_256	0.929246	0.985767	0.798843	0.0629527	0.0432603	0.00177305	0.0250594	0.0264784	0.826087
BobWhite_c9138_101	0.947738	0.990335	0.815063	0.0567249	0.0433048	0.00141844	0.0271409	0.0282218	0.793103
BS00004413_51	0.468853	0.84795	0.713733	0.100271	0.0433769	0.0131206	0.0247023	0.0258259	0.386934
AX-158540499	0.890219	0.992286	0.929735	0.018894	0.0433933	0.00265957	0.0242263	0.0255135	0.847619
TA003443-0646	0.457355	0.853267	0.729596	0.0926552	0.0434187	0.0128251	0.0236343	0.0247245	0.334138
AX-94639168	0.483275	0.870951	0.750257	0.0832193	0.0434715	0.0118794	0.0229899	0.0240531	0.420414
RFL_Contig5314_1147	0.446146	0.854508	0.73731	0.0890704	0.043597	0.0132388	0.023903	0.0251073	0.379169
Kukri_c14877_303	0.875898	0.970382	0.761342	0.0783674	0.0438071	0.00319149	0.0257166	0.0267048	0.653673
wsnp_Ex_c38849_46284348	0.877807	0.979896	0.835471	0.0492326	0.0439334	0.00319149	0.0261185	0.0273534	0.653673
BS00066545_51	0.870642	0.979139	0.838735	0.0480679	0.0440469	0.00319149	0.0246717	0.0258666	0.703148
wsnp_Ex_rep_c103248_88252209	0.870642	0.973206	0.792872	0.0653096	0.0440469	0.00319149	0.0246717	0.0258666	0.703148
AX-94698036	0.872715	0.983615	0.871272	0.0369369	0.0441731	0.00319149	0.0250736	0.0265153	0.703148
AX-158553983	0.872715	0.980131	0.843902	0.046243	0.0441731	0.00319149	0.0250736	0.0265153	0.703148
BobWhite_c41441_185	0.872715	0.980131	0.843902	0.046243	0.0441731	0.00319149	0.0250736	0.0265153	0.703148
Kukri_c100592_82	0.872715	0.980131	0.843902	0.046243	0.0441731	0.00319149	0.0250736	0.0265153	0.703148
AX-108787258	0.854843	0.971969	0.80689	0.0598317	0.0442403	0.0035461	0.0244294	0.0257545	0.79651
AX-108897911	0.854843	0.971969	0.80689	0.0598317	0.0442403	0.0035461	0.0244294	0.0257545	0.79651
AX-111089137	0.854843	0.971969	0.80689	0.0598317	0.0442403	0.0035461	0.0244294	0.0257545	0.79651
AX-158558771	0.854843	0.971969	0.80689	0.0598317	0.0442403	0.0035461	0.0244294	0.0257545	0.79651
AX-158565061	0.854843	0.971969	0.80689	0.0598317	0.0442403	0.0035461	0.0244294	0.0257545	0.79651
BS00022495_51	0.854843	0.971969	0.80689	0.0598317	0.0442403	0.0035461	0.0244294	0.0257545	0.79651
GENE-3439_205	0.854843	0.971969	0.80689	0.0598317	0.0442403	0.0035461	0.0244294	0.0257545	0.79651
RAC875_c232_1895	0.854843	0.971969	0.80689	0.0598317	0.0442403	0.0035461	0.0244294	0.0257545	0.79651
wsnp_Ra_c21347_30731133	0.854843	0.971969	0.80689	0.0598317	0.0442403	0.0035461	0.0244294	0.0257545	0.79651
wsnp_Ex_c922_1775246	0.935978	0.986926	0.795787	0.0641544	0.0442543	0.00177305	0.0276942	0.0291207	0.791304
Excalibur_c63885_115	0.897865	0.976999	0.774796	0.0726657	0.0442573	0.00265957	0.0260397	0.0272384	0.822222
AX-158585662	0.930967	0.981134	0.726712	0.0940153	0.0443359	0.00177305	0.0256839	0.0270264	0.826087
BS00072379_51	0.927544	0.98832	0.838802	0.048044	0.0443705	0.00177305	0.0244708	0.0257043	0.850932
AX-110029490	0.932742	0.985564	0.785357	0.0683265	0.0445472	0.00177305	0.0263621	0.027872	0.826087
AX-110040012	0.932742	0.985564	0.785357	0.0683265	0.0445472	0.00177305	0.0263621	0.027872	0.826087
AX-110063653	0.932742	0.985564	0.785357	0.0683265	0.0445472	0.00177305	0.0263621	0.027872	0.826087
AX-110368348	0.932742	0.985564	0.785357	0.0683265	0.0445472	0.00177305	0.0263621	0.027872	0.826087
AX-110545841	0.932742	0.985564	0.785357	0.0683265	0.0445472	0.00177305	0.0263621	0.027872	0.826087
AX-158560317	0.932742	0.985564	0.785357	0.0683265	0.0445472	0.00177305	0.0263621	0.027872	0.826087
AX-89588221	0.932742	0.985564	0.785357	0.0683265	0.0445472	0.00177305	0.0263621	0.027872	0.826087
AX-94465382	0.932742	0.985564	0.785357	0.0683265	0.0445472	0.00177305	0.0263621	0.027872	0.826087
AX-94480929	0.932742	0.985564	0.785357	0.0683265	0.0445472	0.00177305	0.0263621	0.027872	0.826087
AX-95233557	0.932742	0.985564	0.785357	0.0683265	0.0445472	0.00177305	0.0263621	0.027872	0.826087
BobWhite_c24457_126	0.932742	0.985564	0.785357	0.0683265	0.0445472	0.00177305	0.0263621	0.027872	0.826087
BS00021730_51	0.932742	0.985564	0.785357	0.0683265	0.0445472	0.00177305	0.0263621	0.027872	0.826087
BS00022201_51	0.932742	0.985564	0.785357	0.0683265	0.0445472	0.00177305	0.0263621	0.027872	0.826087
BS00041358_51	0.932742	0.985564	0.785357	0.0683265	0.0445472	0.00177305	0.0263621	0.027872	0.826087
BS00048887_51	0.932742	0.985564	0.785357	0.0683265	0.0445472	0.00177305	0.0263621	0.027872	0.826087
BS00064679_51	0.932742	0.985564	0.785357	0.0683265	0.0445472	0.00177305	0.0263621	0.027872	0.826087
BS00065146_51	0.932742	0.985564	0.785357	0.0683265	0.0445472	0.00177305	0.0263621	0.027872	0.826087
BS00090408_51	0.932742	0.985564	0.785357	0.0683265	0.0445472	0.00177305	0.0263621	0.027872	0.826087
BS00094681_51	0.932742	0.985564	0.785357	0.0683265	0.0445472	0.00177305	0.0263621	0.027872	0.826087
BS00102492_51	0.932742	0.985564	0.785357	0.0683265	0.0445472	0.00177305	0.0263621	0.027872	0.826087
CAP12_c6266_298	0.932742	0.985564	0.785357	0.0683265	0.0445472	0.00177305	0.0263621	0.027872	0.826087
CAP8_c806_297	0.932742	0.985564	0.785357	0.0683265	0.0445472	0.00177305	0.0263621	0.027872	0.826087
Excalibur_c20133_87	0.932742	0.985564	0.785357	0.0683265	0.0445472	0.00177305	0.0263621	0.027872	0.826087
Excalibur_c57766_92	0.932742	0.985564	0.785357	0.0683265	0.0445472	0.00177305	0.0263621	0.027872	0.826087
Excalibur_rep_c88290_94	0.932742	0.985564	0.785357	0.0683265	0.0445472	0.00177305	0.0263621	0.027872	0.826087
Kukri_rep_c115954_137	0.932742	0.985564	0.785357	0.0683265	0.0445472	0.00177305	0.0263621	0.027872	0.826087
Ra_c272_1632	0.932742	0.985564	0.785357	0.0683265	0.0445472	0.00177305	0.0263621	0.027872	0.826087
RAC875_c12808_182	0.932742	0.985564	0.785357	0.0683265	0.0445472	0.00177305	0.0263621	0.027872	0.826087
RAC875_c25799_457	0.932742	0.985564	0.785357	0.0683265	0.0445472	0.00177305	0.0263621	0.027872	0.826087
RAC875_c33300_141	0.932742	0.985564	0.785357	0.0683265	0.0445472	0.00177305	0.0263621	0.027872	0.826087
TA001772-0625	0.932742	0.985564	0.785357	0.0683265	0.0445472	0.00177305	0.0263621	0.027872	0.826087
wsnp_BE403956A_Ta_2_3	0.932742	0.985564	0.785357	0.0683265	0.0445472	0.00177305	0.0263621	0.027872	0.826087
wsnp_BE424246B_Ta_2_2	0.932742	0.985564	0.785357	0.0683265	0.0445472	0.00177305	0.0263621	0.027872	0.826087
wsnp_Ex_c10100_16600633	0.932742	0.985564	0.785357	0.0683265	0.0445472	0.00177305	0.0263621	0.027872	0.826087
wsnp_Ex_c21491_30636749	0.932742	0.985564	0.785357	0.0683265	0.0445472	0.00177305	0.0263621	0.027872	0.826087
wsnp_Ex_c21592_30743513	0.932742	0.985564	0.785357	0.0683265	0.0445472	0.00177305	0.0263621	0.027872	0.826087
wsnp_Ex_c34821_43076533	0.932742	0.985564	0.785357	0.0683265	0.0445472	0.00177305	0.0263621	0.027872	0.826087
wsnp_Ex_c3572_6531810	0.932742	0.985564	0.785357	0.0683265	0.0445472	0.00177305	0.0263621	0.027872	0.826087
wsnp_Ex_c3986_7217641	0.932742	0.985564	0.785357	0.0683265	0.0445472	0.00177305	0.0263621	0.027872	0.826087
wsnp_Ex_c44049_50205457	0.932742	0.985564	0.785357	0.0683265	0.0445472	0.00177305	0.0263621	0.027872	0.826087
wsnp_Ex_c44049_50205904	0.932742	0.985564	0.785357	0.0683265	0.0445472	0.00177305	0.0263621	0.027872	0.826087
wsnp_Ex_c5634_9906981	0.932742	0.985564	0.785357	0.0683265	0.0445472	0.00177305	0.0263621	0.027872	0.826087
wsnp_Ex_c5634_9907829	0.932742	0.985564	0.785357	0.0683265	0.0445472	0.00177305	0.0263621	0.027872	0.826087
wsnp_Ex_c6817_11761300	0.932742	0.985564	0.785357	0.0683265	0.0445472	0.00177305	0.0263621	0.027872	0.826087
wsnp_Ex_c8885_14842394	0.932742	0.985564	0.785357	0.0683265	0.0445472	0.00177305	0.0263621	0.027872	0.826087
wsnp_Ku_c17726_26872129	0.932742	0.985564	0.785357	0.0683265	0.0445472	0.00177305	0.0263621	0.027872	0.826087
BobWhite_c7145_355	0.801526	0.969613	0.846896	0.0451957	0.0445685	0.00496454	0.0250136	0.0260553	0.648727
AX-94778471	0.678044	0.940196	0.814249	0.0570313	0.044761	0.00803783	0.0249656	0.0260476	0.542226
Kukri_c12562_453	0.93634	0.982669	0.727764	0.0935178	0.0448999	0.00177305	0.0278517	0.0290093	0.92381
wsnp_Ex_c10644_17356566	0.93634	0.982669	0.727764	0.0935178	0.0448999	0.00177305	0.0278517	0.0290093	0.92381
AX-109927092	0.932604	0.985615	0.786564	0.0678383	0.0450301	0.00177305	0.0263078	0.0277495	0.826087
AX-158556339	0.932604	0.985615	0.786564	0.0678383	0.0450301	0.00177305	0.0263078	0.0277495	0.826087
BS00023166_51	0.932604	0.985615	0.786564	0.0678383	0.0450301	0.00177305	0.0263078	0.0277495	0.826087
Kukri_c35354_321	0.932604	0.985615	0.786564	0.0678383	0.0450301	0.00177305	0.0263078	0.0277495	0.826087
AX-158556652	0.869152	0.967879	0.754517	0.0813378	0.0450884	0.0035461	0.0271008	0.0286892	0.762595
AX-94542559	0.869152	0.967879	0.754517	0.0813378	0.0450884	0.0035461	0.0271008	0.0286892	0.762595
BS00016654_51	0.869152	0.967879	0.754517	0.0813378	0.0450884	0.0035461	0.0271008	0.0286892	0.762595
BS00010567_51	0.937806	0.989558	0.832108	0.0504417	0.045164	0.00177305	0.0285083	0.0299497	0.791304
Excalibur_c25414_806	0.937806	0.989558	0.832108	0.0504417	0.045164	0.00177305	0.0285083	0.0299497	0.791304
wsnp_RFL_Contig3522_3685860	0.937806	0.989558	0.832108	0.0504417	0.045164	0.00177305	0.0285083	0.0299497	0.791304
AX-158565069	0.865998	0.962601	0.720906	0.0967861	0.0451738	0.0035461	0.0264631	0.0279431	0.762595
AX-158538990	0.865998	0.971179	0.78492	0.0685038	0.0451738	0.0035461	0.0264631	0.0279431	0.762595
AX-94935613	0.865998	0.971179	0.78492	0.0685038	0.0451738	0.0035461	0.0264631	0.0279431	0.762595
GENE-2326_353	0.865998	0.971179	0.78492	0.0685038	0.0451738	0.0035461	0.0264631	0.0279431	0.762595
Kukri_c55909_1109	0.865998	0.971179	0.78492	0.0685038	0.0451738	0.0035461	0.0264631	0.0279431	0.762595
RAC875_c1858_2693	0.865998	0.971179	0.78492	0.0685038	0.0451738	0.0035461	0.0264631	0.0279431	0.762595
RAC875_c87052_193	0.865998	0.971179	0.78492	0.0685038	0.0451738	0.0035461	0.0264631	0.0279431	0.762595
RAC875_rep_c102485_468	0.865998	0.971179	0.78492	0.0685038	0.0451738	0.0035461	0.0264631	0.0279431	0.762595
TA001286-0611-w	0.865998	0.971179	0.78492	0.0685038	0.0451738	0.0035461	0.0264631	0.0279431	0.762595
Tdurum_contig45965_563	0.865998	0.971179	0.78492	0.0685038	0.0451738	0.0035461	0.0264631	0.0279431	0.762595
AX-94679138	0.290592	0.811516	0.734308	0.0904567	0.0453512	0.0178487	0.02516	0.0264627	0.3138
AX-94427458	0.843081	0.962388	0.760311	0.0788126	0.0454224	0.00443262	0.0282478	0.0293608	0.710476
Tdurum_contig13245_119	-0.0106734	0.780061	0.782383	0.0695364	0.0455148	0.028715	0.0284117	0.0301121	-0.024833
Tdurum_contig57324_104	0.884438	0.969438	0.735539	0.089887	0.0455373	0.00319149	0.0276171	0.0288616	0.653673
BS00022562_51	0.884665	0.969829	0.738402	0.0885689	0.0455917	0.00319149	0.0276714	0.0289168	0.653673
Kukri_c542_1538	0.884665	0.969829	0.738402	0.0885689	0.0455917	0.00319149	0.0276714	0.0289168	0.653673
AX-111079110	0.870766	0.974058	0.799265	0.0627874	0.0456105	0.0035461	0.0274394	0.0289043	0.652174
AX-94417635	0.870766	0.974058	0.799265	0.0627874	0.0456105	0.0035461	0.0274394	0.0289043	0.652174
IAAV8162	0.200921	0.774428	0.71771	0.09833	0.0456707	0.0218676	0.027366	0.0288887	0.252791
wsnp_Ex_rep_c66982_65424063	0.935502	0.983497	0.744138	0.0859592	0.0457256	0.00177305	0.02749	0.0286096	0.826087
AX-158557774	0.936531	0.983688	0.742993	0.086477	0.0457509	0.00177305	0.0279358	0.0291238	0.92381
AX-95117727	0.936531	0.983688	0.742993	0.086477	0.0457509	0.00177305	0.0279358	0.0291238	0.92381
IAAV8446	0.837279	0.968745	0.807924	0.0594351	0.0457983	0.00443262	0.0272407	0.0283428	0.648309
BobWhite_c41535_52	0.731328	0.934348	0.755641	0.0808448	0.0459508	0.00791962	0.0294769	0.030699	0.534537
BS00102828_51	0.937089	0.984913	0.760182	0.0788685	0.0459971	0.00177305	0.0281833	0.0296517	0.92381
Kukri_c24148_254	0.719291	0.969997	0.893116	0.0299187	0.0460381	0.0072695	0.0258969	0.0267662	0.477611
AX-89350924	0.743328	0.900396	0.611939	0.158538	0.0460667	0.0072695	0.0283222	0.029251	0.469738
AX-94881376	0.743328	0.900396	0.611939	0.158538	0.0460667	0.0072695	0.0283222	0.029251	0.469738
wsnp_Ex_c17452_26163465	0.743328	0.900396	0.611939	0.158538	0.0460667	0.0072695	0.0283222	0.029251	0.469738
wsnp_Ex_rep_c67036_65492436	0.743328	0.900396	0.611939	0.158538	0.0460667	0.0072695	0.0283222	0.029251	0.469738
wsnp_Ra_c8484_14372772	0.743328	0.900396	0.611939	0.158538	0.0460667	0.0072695	0.0283222	0.029251	0.469738
RAC875_c25203_969	0.812498	0.960469	0.789168	0.0667892	0.0460866	0.00496454	0.0264773	0.0279799	0.648727
Excalibur_c50934_159	0.497087	0.838084	0.678043	0.118708	0.0462112	0.0135934	0.0270293	0.0283036	0.384619
BS00073132_51	0.717985	0.891032	0.61361	0.157425	0.046218	0.00802938	0.0284714	0.029403	0.457441
AX-158608981	0.872473	0.974126	0.797111	0.0636324	0.0462311	0.0035461	0.0278068	0.0293845	0.762595
AX-158618072	0.903882	0.976247	0.752878	0.0820589	0.0462568	0.00265957	0.0276699	0.0288158	0.822222
TGWA25K-TG0214	0.903882	0.976247	0.752878	0.0820589	0.0462568	0.00265957	0.0276699	0.0288158	0.822222
AX-108874073	0.828738	0.987839	0.928994	0.0191084	0.0462741	0.00443262	0.0258821	0.0273218	0.792324
AX-109303197	0.828738	0.987839	0.928994	0.0191084	0.0462741	0.00443262	0.0258821	0.0273218	0.792324
AX-158538040	0.828738	0.987839	0.928994	0.0191084	0.0462741	0.00443262	0.0258821	0.0273218	0.792324
AX-158555703	0.828738	0.987839	0.928994	0.0191084	0.0462741	0.00443262	0.0258821	0.0273218	0.792324
BS00045900_51	0.828738	0.987839	0.928994	0.0191084	0.0462741	0.00443262	0.0258821	0.0273218	0.792324
AX-111577815	0.931312	0.985354	0.786766	0.0677563	0.046357	0.00177305	0.0258133	0.0270618	0.850932
AX-94899864	0.931312	0.985354	0.786766	0.0677563	0.046357	0.00177305	0.0258133	0.0270618	0.850932
BobWhite_c38340_243	0.931312	0.985354	0.786766	0.0677563	0.046357	0.00177305	0.0258133	0.0270618	0.850932
TA003665-0980	0.931312	0.985354	0.786766	0.0677563	0.046357	0.00177305	0.0258133	0.0270618	0.850932
TA004394-0527	0.931312	0.985354	0.786766	0.0677563	0.046357	0.00177305	0.0258133	0.0270618	0.850932
BS00022687_51	0.857583	0.976025	0.831657	0.0506048	0.0463721	0.00378251	0.0265594	0.0281644	0.700956
AX-158556315	0.540151	0.917007	0.819522	0.0550558	0.0463888	0.0127069	0.0276327	0.0291372	0.573539
Tdurum_contig74815_1274	0.540151	0.917007	0.819522	0.0550558	0.0463888	0.0127069	0.0276327	0.0291372	0.573539
Tdurum_contig74815_1413	0.540151	0.917007	0.819522	0.0550558	0.0463888	0.0127069	0.0276327	0.0291372	0.573539
AX-94914088	0.709343	0.959519	0.860727	0.0404521	0.0464106	0.00744681	0.0256206	0.0269551	0.477016
wsnp_Ex_c18318_27140346	0.870707	0.959503	0.686783	0.114016	0.0464466	0.0035461	0.0274268	0.028664	0.762595
RAC875_rep_c99492_65	0.789804	0.933138	0.681906	0.116619	0.0464638	0.00555556	0.0264304	0.027744	0.551888
AX-94417303	0.935402	0.985459	0.774905	0.0726202	0.0465113	0.00177305	0.0274476	0.02891	0.826087
AX-94526208	0.935402	0.985459	0.774905	0.0726202	0.0465113	0.00177305	0.0274476	0.02891	0.826087
wsnp_Ra_rep_c74606_72470419	0.935402	0.985459	0.774905	0.0726202	0.0465113	0.00177305	0.0274476	0.02891	0.826087
wsnp_Ku_c51039_56457361	0.760352	0.948465	0.784955	0.0684896	0.0465383	0.00620567	0.025895	0.0271789	0.644129
AX-158606849	0.939229	0.991404	0.858553	0.0411877	0.0465687	0.00177305	0.0291758	0.0303754	0.964444
BS00022902_51	0.762259	0.942057	0.756276	0.080567	0.0466015	0.00650118	0.0273457	0.0285428	0.638587
AX-94873939	0.972113	0.993943	0.782799	0.0693666	0.0466049	0.000759878	0.0272486	0.0287466	0.963399
AX-158550809	0.938329	0.978992	0.659359	0.129156	0.0466606	0.00177305	0.02875	0.0299528	0.92381
AX-158584512	0.938329	0.978992	0.659359	0.129156	0.0466606	0.00177305	0.02875	0.0299528	0.92381
AX-94428612	0.938329	0.978992	0.659359	0.129156	0.0466606	0.00177305	0.02875	0.0299528	0.92381
BS00081951_51	0.938329	0.978992	0.659359	0.129156	0.0466606	0.00177305	0.02875	0.0299528	0.92381
Ex_c2332_275	0.938329	0.978992	0.659359	0.129156	0.0466606	0.00177305	0.02875	0.0299528	0.92381
Kukri_c98858_299	0.865117	0.978139	0.837926	0.0483556	0.0466703	0.0035461	0.0262902	0.027376	0.79651
wsnp_Ex_rep_c105478_89891634	0.873382	0.967327	0.741955	0.0869478	0.0466906	0.0035461	0.0280063	0.0295562	0.762595
Kukri_c49091_415	0.936491	0.983393	0.738513	0.0885182	0.0467411	0.00177305	0.0279183	0.0291951	0.826087
CAP12_rep_c4571_181	0.936035	0.985407	0.771855	0.0738951	0.0467438	0.00177305	0.027719	0.0292536	0.826087
Ra_c109604_751	0.936035	0.985407	0.771855	0.0738951	0.0467438	0.00177305	0.027719	0.0292536	0.826087
TA001478-0609	0.936035	0.985407	0.771855	0.0738951	0.0467438	0.00177305	0.027719	0.0292536	0.826087
wsnp_Ex_c30689_39574415	0.936035	0.985407	0.771855	0.0738951	0.0467438	0.00177305	0.027719	0.0292536	0.826087
AX-158574911	0.940747	0.98294	0.712088	0.10108	0.0468336	0.00177305	0.0299232	0.0308883	0.791304
AX-95247247	0.940747	0.98294	0.712088	0.10108	0.0468336	0.00177305	0.0299232	0.0308883	0.791304
AX-158541582	0.394372	0.824828	0.71076	0.101736	0.04687	0.0157801	0.0260559	0.027325	0.322133
AX-94896508	0.872035	0.972913	0.788324	0.0671287	0.0469436	0.0035461	0.0277114	0.0292142	0.762595
AX-86164634	0.872035	0.970866	0.77233	0.0736959	0.0469436	0.0035461	0.0277114	0.0292142	0.762595
AX-94654729	0.872035	0.970866	0.77233	0.0736959	0.0469436	0.0035461	0.0277114	0.0292142	0.762595
RAC875_c48107_65	0.872035	0.970866	0.77233	0.0736959	0.0469436	0.0035461	0.0277114	0.0292142	0.762595
wsnp_Ku_c13952_22097895	0.872035	0.970866	0.77233	0.0736959	0.0469436	0.0035461	0.0277114	0.0292142	0.762595
IAAV6234	0.842709	0.984711	0.902801	0.026916	0.0470034	0.00407801	0.0259265	0.0272851	0.737356
AX-89557934	0.939083	0.98474	0.749495	0.0835579	0.0470686	0.00177305	0.0291061	0.0305912	0.92381
TGWA25K-TG0199	0.542668	0.882488	0.743049	0.0864514	0.0471161	0.0130615	0.0285601	0.0298427	0.277123
BobWhite_c34233_205	0.822987	0.970098	0.831076	0.0508148	0.0471563	0.00460993	0.0260429	0.0272851	0.610945
Excalibur_c90713_226	0.728745	0.972908	0.900124	0.0277396	0.0471918	0.00764944	0.0282002	0.0293261	0.510921
BobWhite_c13400_608	0.705619	0.966866	0.887446	0.0317074	0.0471924	0.00786052	0.0267019	0.0276336	0.475693
BS00064227_51	0.478447	0.83776	0.68893	0.112882	0.0472572	0.0138889	0.0266299	0.0279377	0.329603
wsnp_JD_c352_546108	0.691117	0.942706	0.814512	0.0569321	0.0473038	0.00851064	0.027553	0.0288731	0.616714
AX-158545078	0.936815	0.991999	0.873366	0.036249	0.0473083	0.00177305	0.0280612	0.029753	0.936508
IACX11338	0.326894	0.80875	0.71587	0.0992257	0.0475479	0.0178487	0.0265169	0.0278443	0.3138
AX-95108463	0.948377	0.986895	0.746142	0.0850567	0.0475672	0.00151976	0.0294393	0.0309622	0.951304
AX-111516857	0.884922	0.979762	0.824139	0.053347	0.0476567	0.00319149	0.0277332	0.0292905	0.703148
Tdurum_contig42636_995	0.884922	0.979762	0.824139	0.053347	0.0476567	0.00319149	0.0277332	0.0292905	0.703148
AX-158559458	0.860315	0.977142	0.836361	0.0489141	0.0476926	0.00378251	0.0270789	0.0283338	0.700956
AX-109475553	0.937337	0.978665	0.65953	0.129058	0.0477153	0.00177305	0.0282949	0.029755	0.826087
IAAV4105	0.937337	0.978665	0.65953	0.129058	0.0477153	0.00177305	0.0282949	0.029755	0.826087
RFL_Contig5758_757	0.937337	0.978665	0.65953	0.129058	0.0477153	0.00177305	0.0282949	0.029755	0.826087
Tdurum_contig12941_1413	0.937337	0.978665	0.65953	0.129058	0.0477153	0.00177305	0.0282949	0.029755	0.826087
BobWhite_c14966_231	0.81309	0.981082	0.898788	0.0281524	0.0477314	0.00536981	0.0287294	0.0298649	0.544825
AX-94419462	0.937742	0.9853	0.763886	0.0772738	0.0477689	0.00177305	0.0284789	0.02996	0.826087
AX-95224021	0.937742	0.9853	0.763886	0.0772738	0.0477689	0.00177305	0.0284789	0.02996	0.826087
Kukri_c21818_519	0.937742	0.9853	0.763886	0.0772738	0.0477689	0.00177305	0.0284789	0.02996	0.826087
RAC875_rep_c78007_425	0.937742	0.9853	0.763886	0.0772738	0.0477689	0.00177305	0.0284789	0.02996	0.826087
wsnp_Ku_c21818_31604716	0.937742	0.9853	0.763886	0.0772738	0.0477689	0.00177305	0.0284789	0.02996	0.826087
wsnp_Ku_c4078_7436510	0.937742	0.9853	0.763886	0.0772738	0.0477689	0.00177305	0.0284789	0.02996	0.826087
wsnp_Ra_c39394_47110214	0.937742	0.9853	0.763886	0.0772738	0.0477689	0.00177305	0.0284789	0.02996	0.826087
BobWhite_c4646_119	0.938992	0.986919	0.785582	0.0682354	0.0478011	0.00177305	0.0290627	0.030695	0.826087
AX-158538155	0.938992	0.981964	0.704366	0.104929	0.0478011	0.00177305	0.0290627	0.030695	0.826087
AX-158541173	0.938992	0.981964	0.704366	0.104929	0.0478011	0.00177305	0.0290627	0.030695	0.826087
AX-158541179	0.938992	0.981964	0.704366	0.104929	0.0478011	0.00177305	0.0290627	0.030695	0.826087
BS00022417_51	0.938992	0.981964	0.704366	0.104929	0.0478011	0.00177305	0.0290627	0.030695	0.826087
BS00022949_51	0.938992	0.981964	0.704366	0.104929	0.0478011	0.00177305	0.0290627	0.030695	0.826087
GENE-1196_146	0.938992	0.981964	0.704366	0.104929	0.0478011	0.00177305	0.0290627	0.030695	0.826087
GENE-4359_102	0.938992	0.981964	0.704366	0.104929	0.0478011	0.00177305	0.0290627	0.030695	0.826087
Kukri_c9387_112	0.938992	0.981964	0.704366	0.104929	0.0478011	0.00177305	0.0290627	0.030695	0.826087
Ra_c2110_1660	0.938992	0.981964	0.704366	0.104929	0.0478011	0.00177305	0.0290627	0.030695	0.826087
wsnp_BF202681B_Ta_2_2	0.938992	0.981964	0.704366	0.104929	0.0478011	0.00177305	0.0290627	0.030695	0.826087
wsnp_Ku_c4507_8157580	0.938992	0.981964	0.704366	0.104929	0.0478011	0.00177305	0.0290627	0.030695	0.826087
AX-158603119	0.937444	0.980469	0.687776	0.113491	0.0478194	0.00177305	0.0283435	0.0298016	0.826087
Tdurum_contig14986_191	0.870006	0.968958	0.761201	0.0784283	0.0478436	0.0035461	0.027279	0.0286446	0.79651
Tdurum_contig76709_195	0.828544	0.970405	0.827392	0.0521544	0.0478632	0.00460993	0.026887	0.028145	0.69787
tplb0032g12_1241	0.330016	0.86633	0.800488	0.0623094	0.0479477	0.0180851	0.0269933	0.0284296	0.358793
wsnp_RFL_Contig2805_2579582	0.330016	0.86633	0.800488	0.0623094	0.0479477	0.0180851	0.0269933	0.0284296	0.358793
Tdurum_contig13879_352	0.940741	0.986699	0.775549	0.0723522	0.0479783	0.00177305	0.0299202	0.0314201	0.92381
AX-109341038	0.940741	0.984563	0.7395	0.0880663	0.0479783	0.00177305	0.0299202	0.0314201	0.92381
AX-158558079	0.781043	0.961915	0.82606	0.0526415	0.0479803	0.00602837	0.0275323	0.0290587	0.692202
BS00089954_51	0.781043	0.961915	0.82606	0.0526415	0.0479803	0.00602837	0.0275323	0.0290587	0.692202
BobWhite_c948_52	0.938824	0.978003	0.64043	0.140362	0.0480023	0.00177305	0.0289827	0.0301999	0.826087
Tdurum_contig11802_864	0.938745	0.981933	0.70506	0.10458	0.0480428	0.00177305	0.0289454	0.0301284	0.826087
BobWhite_c8266_582	0.79481	0.94368	0.72552	0.0945802	0.0481638	0.00602837	0.0293794	0.0304373	0.640902
wsnp_BG604404B_Ta_2_1	0.79481	0.94368	0.72552	0.0945802	0.0481638	0.00602837	0.0293794	0.0304373	0.640902
AX-94707625	0.839122	0.965064	0.782839	0.0693504	0.0482346	0.00443262	0.0275528	0.029138	0.698551
AX-94922494	0.839122	0.965064	0.782839	0.0693504	0.0482346	0.00443262	0.0275528	0.029138	0.698551
BS00095061_51	0.839122	0.965064	0.782839	0.0693504	0.0482346	0.00443262	0.0275528	0.029138	0.698551
wsnp_Ex_c19476_28434084	0.154934	0.747302	0.700972	0.106647	0.048264	0.0248227	0.0293737	0.0309872	0.249774
AX-95229999	0.893188	0.984231	0.852362	0.0433025	0.0482734	0.00319149	0.0298795	0.0313681	0.653673
Excalibur_c7338_563	0.692739	0.972966	0.912016	0.024118	0.0482836	0.00786052	0.0255826	0.02664	0.533949
AX-111567165	0.908559	0.97404	0.716105	0.099111	0.0483043	0.00265957	0.0290851	0.0303848	0.822222
AX-94626492	0.79011	0.96392	0.828101	0.0518955	0.0484124	0.00585106	0.0278768	0.0293346	0.664265
Tdurum_contig12159_468	0.771739	0.9453	0.76036	0.0787914	0.0484248	0.00658561	0.0288513	0.0303747	0.665373
Excalibur_c8284_580	0.87709	0.97264	0.777395	0.0715869	0.0484248	0.0035461	0.0288513	0.0303747	0.762595
BS00061979_51	0.87709	0.970546	0.76036	0.0787914	0.0484248	0.0035461	0.0288513	0.0303747	0.762595
AX-158590627	0.499391	0.834546	0.669495	0.123416	0.0484389	0.0143026	0.0285704	0.0298566	0.436839
AX-108760176	0.938791	0.985246	0.758954	0.0794006	0.0485137	0.00177305	0.0289673	0.0305247	0.826087
AX-108791745	0.938791	0.985246	0.758954	0.0794006	0.0485137	0.00177305	0.0289673	0.0305247	0.826087
AX-86165887	0.938791	0.985246	0.758954	0.0794006	0.0485137	0.00177305	0.0289673	0.0305247	0.826087
AX-95149116	0.938791	0.985246	0.758954	0.0794006	0.0485137	0.00177305	0.0289673	0.0305247	0.826087
BobWhite_c1488_504	0.938791	0.985246	0.758954	0.0794006	0.0485137	0.00177305	0.0289673	0.0305247	0.826087
BS00003866_51	0.938791	0.985246	0.758954	0.0794006	0.0485137	0.00177305	0.0289673	0.0305247	0.826087
BS00084022_51	0.938791	0.985246	0.758954	0.0794006	0.0485137	0.00177305	0.0289673	0.0305247	0.826087
CAP11_c6014_160	0.938791	0.985246	0.758954	0.0794006	0.0485137	0.00177305	0.0289673	0.0305247	0.826087
Excalibur_c49588_76	0.938791	0.985246	0.758954	0.0794006	0.0485137	0.00177305	0.0289673	0.0305247	0.826087
RAC875_c38417_246	0.938791	0.985246	0.758954	0.0794006	0.0485137	0.00177305	0.0289673	0.0305247	0.826087
RAC875_c8515_653	0.938791	0.985246	0.758954	0.0794006	0.0485137	0.00177305	0.0289673	0.0305247	0.826087
RAC875_c9833_297	0.938791	0.985246	0.758954	0.0794006	0.0485137	0.00177305	0.0289673	0.0305247	0.826087
wsnp_Ex_c3906_7086162	0.938791	0.985246	0.758954	0.0794006	0.0485137	0.00177305	0.0289673	0.0305247	0.826087
Tdurum_contig41912_893	0.939167	0.983031	0.721058	0.096713	0.0485168	0.00177305	0.0291461	0.0305668	0.826087
IAAV6180	0.886285	0.952154	0.579245	0.181596	0.0485444	0.0035461	0.031184	0.0325409	0.750968
wsnp_Ex_c38326_45883440	0.886285	0.952154	0.579245	0.181596	0.0485444	0.0035461	0.031184	0.0325409	0.750968
AX-158546026	0.491731	0.885107	0.773952	0.0730173	0.0486963	0.0141253	0.027791	0.0291439	0.375856
AX-158557761	0.827683	0.970953	0.831431	0.0506864	0.0487199	0.00496454	0.0288105	0.0303227	0.55408
AX-94413327	0.827683	0.970953	0.831431	0.0506864	0.0487199	0.00496454	0.0288105	0.0303227	0.55408
BobWhite_c10402_140	0.936408	0.986062	0.780813	0.0701793	0.0487352	0.00177305	0.0278818	0.0294053	0.850932
AX-158570193	0.939695	0.985137	0.753529	0.0817723	0.0488404	0.00177305	0.0294016	0.0308995	0.826087
AX-158605698	0.939695	0.985137	0.753529	0.0817723	0.0488404	0.00177305	0.0294016	0.0308995	0.826087
AX-94414376	0.939695	0.985137	0.753529	0.0817723	0.0488404	0.00177305	0.0294016	0.0308995	0.826087
AX-95164074	0.939695	0.985137	0.753529	0.0817723	0.0488404	0.00177305	0.0294016	0.0308995	0.826087
BS00096719_51	0.939695	0.985137	0.753529	0.0817723	0.0488404	0.00177305	0.0294016	0.0308995	0.826087
wsnp_Ex_c1440_2764867	0.939695	0.985137	0.753529	0.0817723	0.0488404	0.00177305	0.0294016	0.0308995	0.826087
RAC875_rep_c73925_276	0.410456	0.81766	0.69071	0.111946	0.0488565	0.016253	0.0275687	0.0289737	0.320149
AX-158521124	0.94017	0.987772	0.795617	0.0642217	0.0490235	0.00177305	0.0296346	0.0310642	0.826087
BS00038643_51	0.94017	0.987772	0.795617	0.0642217	0.0490235	0.00177305	0.0296346	0.0310642	0.826087
AX-158537529	0.811276	0.977432	0.880418	0.0339561	0.0490333	0.00549645	0.0291243	0.0306738	0.552053
BS00078982_51	0.811276	0.977432	0.880418	0.0339561	0.0490333	0.00549645	0.0291243	0.0306738	0.552053
Excalibur_c3762_715	0.864499	0.979457	0.848396	0.0446738	0.0490487	0.00413712	0.030532	0.0323571	0.779933
AX-110936094	0.937473	0.986411	0.782672	0.0694187	0.0490801	0.00177305	0.0283567	0.0300614	0.850932
AX-94439758	0.937473	0.986411	0.782672	0.0694187	0.0490801	0.00177305	0.0283567	0.0300614	0.850932
Kukri_c4074_463	0.937473	0.986411	0.782672	0.0694187	0.0490801	0.00177305	0.0283567	0.0300614	0.850932
Kukri_c7804_2504	0.937473	0.986411	0.782672	0.0694187	0.0490801	0.00177305	0.0283567	0.0300614	0.850932
TA003382-0407	0.855319	0.966868	0.771001	0.0742537	0.0491123	0.00413712	0.0285948	0.0302361	0.699671
wsnp_Ex_c17127_25756019	0.764022	0.945114	0.767411	0.0757707	0.0492653	0.00691489	0.0293032	0.0306349	0.746439
BobWhite_c20706_135	0.357158	0.805897	0.698055	0.108138	0.0493177	0.0178487	0.0277653	0.0291154	0.3138
BS00039489_51	0.861511	0.941061	0.574417	0.185224	0.0493743	0.00413712	0.0298732	0.0314231	0.75942
BobWhite_c16635_331	0.335228	0.80875	0.712307	0.100972	0.0494801	0.0178487	0.0268494	0.0281989	0.275766
AX-95208769	0.61875	0.885412	0.699441	0.107428	0.0495111	0.0114657	0.030074	0.0314148	0.44961
RFL_Contig5450_993	0.846385	0.964574	0.769387	0.0749341	0.0495215	0.00443262	0.0288554	0.0305316	0.698551
GENE-0014_317	0.845207	0.96641	0.783	0.0692847	0.0495309	0.00460993	0.0297813	0.0312594	0.555365
Kukri_c2408_857	0.845207	0.96641	0.783	0.0692847	0.0495309	0.00460993	0.0297813	0.0312594	0.555365
wsnp_Ra_c11211_18227610	0.845207	0.96641	0.783	0.0692847	0.0495309	0.00460993	0.0297813	0.0312594	0.555365
BobWhite_rep_c50671_356	0.872432	0.974694	0.801628	0.0618653	0.04965	0.00407801	0.0319673	0.0337829	0.738667
AX-94808669	0.881332	0.970218	0.749032	0.0837641	0.0496824	0.0035461	0.0298825	0.0314247	0.762595
BS00079166_51	0.881332	0.970218	0.749032	0.0837641	0.0496824	0.0035461	0.0298825	0.0314247	0.762595
tplb0060p09_735	0.881332	0.970218	0.749032	0.0837641	0.0496824	0.0035461	0.0298825	0.0314247	0.762595
AX-109821362	0.94132	0.984969	0.743854	0.0860875	0.04975	0.00177305	0.0302157	0.0317285	0.826087
AX-95072534	0.94132	0.984969	0.743854	0.0860875	0.04975	0.00177305	0.0302157	0.0317285	0.826087
AX-158565192	0.364136	0.922648	0.878352	0.034624	0.0499354	0.0182624	0.0287206	0.0302334	0.252184
BS00099782_51	0.941375	0.983021	0.710386	0.101921	0.0499925	0.00177305	0.0302438	0.0314095	0.826087
Kukri_c37692_347	0.941375	0.983021	0.710386	0.101921	0.0499925	0.00177305	0.0302438	0.0314095	0.826087
RAC875_c8757_589	0.941375	0.983021	0.710386	0.101921	0.0499925	0.00177305	0.0302438	0.0314095	0.826087
wsnp_Ku_c12503_20174234	0.941109	0.988568	0.80588	0.0602198	0.0499949	0.00177305	0.0301072	0.0316852	0.826087
Tdurum_contig50783_67	0.941109	0.985081	0.746675	0.0848177	0.0499949	0.00177305	0.0301072	0.0316852	0.826087
RAC875_c583_391	0.876282	0.973127	0.782791	0.0693701	0.0500002	0.00378251	0.0305736	0.0324141	0.781432
BS00063429_51	0.767008	0.937031	0.729739	0.0925881	0.0500126	0.0070922	0.0304396	0.0321015	0.709226
BS00094057_51	0.882507	0.95982	0.65802	0.129928	0.0500596	0.0035461	0.0301814	0.0316411	0.762595
Kukri_c19883_365	0.944444	0.987925	0.782659	0.0694239	0.0500896	0.00177305	0.0319149	0.0335478	0.92381
Kukri_c22513_1780	0.661408	0.908347	0.729311	0.0927891	0.0501582	0.0104019	0.030721	0.0321477	0.454901
AX-108940705	0.791328	0.96161	0.816026	0.0563629	0.050177	0.00602837	0.0288892	0.0304403	0.692202
AX-111643893	0.791328	0.96161	0.816026	0.0563629	0.050177	0.00602837	0.0288892	0.0304403	0.692202
AX-158598302	0.791328	0.96161	0.816026	0.0563629	0.050177	0.00602837	0.0288892	0.0304403	0.692202
BS00022122_51	0.791328	0.96161	0.816026	0.0563629	0.050177	0.00602837	0.0288892	0.0304403	0.692202
BS00043664_51	0.791328	0.96161	0.816026	0.0563629	0.050177	0.00602837	0.0288892	0.0304403	0.692202
BS00094710_51	0.791328	0.96161	0.816026	0.0563629	0.050177	0.00602837	0.0288892	0.0304403	0.692202
IACX3190	0.791328	0.96161	0.816026	0.0563629	0.050177	0.00602837	0.0288892	0.0304403	0.692202
Kukri_c4310_489	0.791328	0.96161	0.816026	0.0563629	0.050177	0.00602837	0.0288892	0.0304403	0.692202
RAC875_c11254_739	0.791328	0.96161	0.816026	0.0563629	0.050177	0.00602837	0.0288892	0.0304403	0.692202
TA002966-0294	0.791328	0.96161	0.816026	0.0563629	0.050177	0.00602837	0.0288892	0.0304403	0.692202
AX-158545011	0.907357	0.986224	0.851297	0.0436695	0.0501806	0.00265957	0.0287079	0.0303419	0.847619
AX-95174986	0.907357	0.986224	0.851297	0.0436695	0.0501806	0.00265957	0.0287079	0.0303419	0.847619
AX-95204890	0.907357	0.986224	0.851297	0.0436695	0.0501806	0.00265957	0.0287079	0.0303419	0.847619
BS00012051_51	0.907357	0.986224	0.851297	0.0436695	0.0501806	0.00265957	0.0287079	0.0303419	0.847619
AX-158528328	0.898306	0.978829	0.791817	0.0657297	0.0502292	0.00319149	0.0313833	0.0327813	0.653673
AX-158573154	0.823511	0.949484	0.713771	0.100253	0.0502438	0.00496454	0.0281295	0.0294395	0.692636
RAC875_c34757_180	0.823511	0.949484	0.713771	0.100253	0.0502438	0.00496454	0.0281295	0.0294395	0.692636
Excalibur_rep_c111743_194	0.25838	0.847387	0.794216	0.0647757	0.0503255	0.0205083	0.0276533	0.0291223	0.266242
RAC875_c20700_853	0.25838	0.847387	0.794216	0.0647757	0.0503255	0.0205083	0.0276533	0.0291223	0.266242
AX-158523659	0.25838	0.788764	0.715169	0.0995675	0.0503255	0.0205083	0.0276533	0.0291223	0.266242
AX-89381556	0.25838	0.788764	0.715169	0.0995675	0.0503255	0.0205083	0.0276533	0.0291223	0.266242
Excalibur_c56240_176	0.25838	0.788764	0.715169	0.0995675	0.0503255	0.0205083	0.0276533	0.0291223	0.266242
Kukri_c1308_2236	0.25838	0.788764	0.715169	0.0995675	0.0503255	0.0205083	0.0276533	0.0291223	0.266242
wsnp_Ex_c1482_2835474	0.25838	0.788764	0.715169	0.0995675	0.0503255	0.0205083	0.0276533	0.0291223	0.266242
AX-94912250	0.789099	0.950606	0.765796	0.0764578	0.050406	0.00661939	0.0313863	0.0332494	0.602861
AX-158521483	0.941863	0.984761	0.737884	0.0888065	0.0504499	0.00177305	0.0304978	0.0318803	0.826087
AX-158570814	0.941863	0.984761	0.737884	0.0888065	0.0504499	0.00177305	0.0304978	0.0318803	0.826087
Kukri_c5861_360	0.941863	0.984761	0.737884	0.0888065	0.0504499	0.00177305	0.0304978	0.0318803	0.826087
wsnp_Ku_c16432_25320146	0.68671	0.9034	0.69166	0.111449	0.0504579	0.00904255	0.0288632	0.0303575	0.584841
AX-94417710	0.942659	0.984798	0.734884	0.0901897	0.0505146	0.00177305	0.0309213	0.0324469	0.826087
AX-94760290	0.942659	0.984798	0.734884	0.0901897	0.0505146	0.00177305	0.0309213	0.0324469	0.826087
wsnp_Ex_c3834_6971712	0.941651	0.984056	0.726744	0.0940002	0.0506079	0.00177305	0.0303868	0.0316417	0.936508
AX-94726653	0.460266	0.873551	0.76572	0.0764901	0.0506386	0.015721	0.0291274	0.0304461	0.369507
BS00022176_51	0.884538	0.985041	0.870445	0.0372094	0.0506842	0.0035461	0.0307122	0.0318481	0.762595
AX-95169625	0.945487	0.98474	0.720065	0.0971909	0.0507072	0.00177305	0.0325255	0.0340728	0.92381
BS00070900_51	0.945487	0.9834	0.695489	0.109459	0.0507072	0.00177305	0.0325255	0.0340728	0.92381
Kukri_rep_c107323_210	0.847421	0.949797	0.670966	0.122597	0.0507085	0.00443262	0.0290514	0.0306461	0.698551
AX-158544026	0.901617	0.989887	0.897204	0.0286434	0.0507088	0.00283688	0.0288352	0.030127	0.741379
AX-158521229	0.884886	0.969882	0.738365	0.0885858	0.0507538	0.0035461	0.0308052	0.0323642	0.762595
AX-158524870	0.884886	0.969882	0.738365	0.0885858	0.0507538	0.0035461	0.0308052	0.0323642	0.762595
AX-158560897	0.884886	0.969882	0.738365	0.0885858	0.0507538	0.0035461	0.0308052	0.0323642	0.762595
AX-94936410	0.884886	0.969882	0.738365	0.0885858	0.0507538	0.0035461	0.0308052	0.0323642	0.762595
BS00022775_51	0.884886	0.969882	0.738365	0.0885858	0.0507538	0.0035461	0.0308052	0.0323642	0.762595
wsnp_CAP8_c1013_646748	0.884886	0.969882	0.738365	0.0885858	0.0507538	0.0035461	0.0308052	0.0323642	0.762595
AX-158526437	0.892174	0.974942	0.76761	0.0756864	0.0508401	0.00319149	0.0295986	0.031178	0.703148
AX-94612603	0.892174	0.974942	0.76761	0.0756864	0.0508401	0.00319149	0.0295986	0.031178	0.703148
CAP7_c11822_124	0.838649	0.96242	0.767092	0.0759061	0.0509349	0.00471125	0.0291987	0.0308102	0.610625
RFL_Contig5898_1464	0.797652	0.978729	0.894877	0.0293679	0.0509425	0.00549645	0.0271634	0.0283206	0.651596
RFL_Contig5898_807	0.797652	0.978729	0.894877	0.0293679	0.0509425	0.00549645	0.0271634	0.0283206	0.651596
Excalibur_c18966_804	0.702113	0.931252	0.769215	0.0750066	0.0509936	0.00886525	0.0297604	0.031526	0.633245
Excalibur_c46000_203	0.943019	0.983456	0.709657	0.102283	0.0510196	0.00177305	0.0311165	0.0324062	0.826087
Tdurum_contig76960_213	0.943385	0.975505	0.567329	0.190662	0.0510583	0.00177305	0.0313179	0.0329527	0.826087
AX-158521426	0.943746	0.984622	0.726643	0.0940477	0.0511459	0.00177305	0.0315184	0.0330548	0.826087
BS00066338_51	0.943746	0.984622	0.726643	0.0940477	0.0511459	0.00177305	0.0315184	0.0330548	0.826087
AX-158540869	0.891591	0.977657	0.793905	0.064899	0.0511648	0.00319149	0.0294393	0.0310553	0.740255
AX-89706867	0.891591	0.977657	0.793905	0.064899	0.0511648	0.00319149	0.0294393	0.0310553	0.740255
BS00044274_51	0.891591	0.977657	0.793905	0.064899	0.0511648	0.00319149	0.0294393	0.0310553	0.740255
AX-94778887	0.870265	0.975132	0.808316	0.0592848	0.0512454	0.00413712	0.0318889	0.0337387	0.779933
AX-111084543	0.792626	0.9438	0.72899	0.0929403	0.0512511	0.00620567	0.029925	0.0311098	0.644129
AX-158525923	0.792626	0.9438	0.72899	0.0929403	0.0512511	0.00620567	0.029925	0.0311098	0.644129
AX-158559346	0.943059	0.984913	0.735037	0.090119	0.0512524	0.00177305	0.0311384	0.0327352	0.826087
AX-158588985	0.943059	0.984913	0.735037	0.090119	0.0512524	0.00177305	0.0311384	0.0327352	0.826087
Tdurum_contig48049_705	0.943059	0.984913	0.735037	0.090119	0.0512524	0.00177305	0.0311384	0.0327352	0.826087
Tdurum_contig51613_821	0.943059	0.984913	0.735037	0.090119	0.0512524	0.00177305	0.0311384	0.0327352	0.826087
wsnp_CD454706B_Ta_1_1	0.943059	0.984913	0.735037	0.090119	0.0512524	0.00177305	0.0311384	0.0327352	0.826087
AX-108856741	0.940329	0.986274	0.769967	0.0746894	0.0512767	0.00177305	0.0297137	0.0314429	0.850932
AX-110403928	0.940329	0.986274	0.769967	0.0746894	0.0512767	0.00177305	0.0297137	0.0314429	0.850932
AX-111010677	0.940329	0.986274	0.769967	0.0746894	0.0512767	0.00177305	0.0297137	0.0314429	0.850932
AX-111467329	0.940329	0.986274	0.769967	0.0746894	0.0512767	0.00177305	0.0297137	0.0314429	0.850932
AX-89691394	0.940329	0.986274	0.769967	0.0746894	0.0512767	0.00177305	0.0297137	0.0314429	0.850932
AX-89748301	0.940329	0.986274	0.769967	0.0746894	0.0512767	0.00177305	0.0297137	0.0314429	0.850932
AX-94452286	0.940329	0.986274	0.769967	0.0746894	0.0512767	0.00177305	0.0297137	0.0314429	0.850932
BobWhite_c11540_60	0.940329	0.986274	0.769967	0.0746894	0.0512767	0.00177305	0.0297137	0.0314429	0.850932
wsnp_Ex_c19372_28313727	0.940329	0.986274	0.769967	0.0746894	0.0512767	0.00177305	0.0297137	0.0314429	0.850932
wsnp_Ex_c2580_4800027	0.940329	0.986274	0.769967	0.0746894	0.0512767	0.00177305	0.0297137	0.0314429	0.850932
AX-158593395	0.695094	0.958816	0.864928	0.0390414	0.0512998	0.00886525	0.0290753	0.0306958	0.472056
AX-158536728	0.908616	0.983834	0.8231	0.05373	0.0513812	0.00283688	0.0310435	0.0323905	0.704433
AX-158541833	0.908616	0.983834	0.8231	0.05373	0.0513812	0.00283688	0.0310435	0.0323905	0.704433
Ra_c26970_1740	0.800331	0.952347	0.761339	0.0783689	0.0514639	0.00602837	0.0301918	0.0318339	0.692202
Kukri_c58054_59	0.83056	0.950444	0.707532	0.103341	0.0515615	0.00496454	0.0292997	0.0309069	0.692636
AX-95202607	0.894919	0.980778	0.817072	0.0559704	0.0515894	0.00319149	0.0303717	0.0318919	0.703148
tplb0056b15_858	0.944677	0.982245	0.679069	0.118151	0.05163	0.00177305	0.0320493	0.0335769	0.826087
wsnp_CAP8_c334_304253	0.944604	0.984442	0.719157	0.0976292	0.0516526	0.00177305	0.0320069	0.0335522	0.826087
AX-108744710	0.88785	0.976789	0.793037	0.0652439	0.0516635	0.0035461	0.0316194	0.0331932	0.762595
BS00110564_51	0.88785	0.969538	0.728382	0.0932263	0.0516635	0.0035461	0.0316194	0.0331932	0.762595
GENE-2278_444	0.944835	0.9836	0.702711	0.105765	0.0516761	0.00177305	0.032141	0.0332977	0.826087
Excalibur_c25640_110	0.858104	0.96217	0.733397	0.0908793	0.0516871	0.00443262	0.0312386	0.0326499	0.75873
Tdurum_contig51922_676	0.858104	0.96217	0.733397	0.0908793	0.0516871	0.00443262	0.0312386	0.0326499	0.75873
AX-110009550	0.945205	0.983998	0.70796	0.103128	0.051894	0.00177305	0.0323582	0.0335188	0.826087
AX-110958367	0.945205	0.983998	0.70796	0.103128	0.051894	0.00177305	0.0323582	0.0335188	0.826087
Excalibur_c57603_523	0.945205	0.983998	0.70796	0.103128	0.051894	0.00177305	0.0323582	0.0335188	0.826087
Kukri_rep_c101259_81	0.945205	0.983998	0.70796	0.103128	0.051894	0.00177305	0.0323582	0.0335188	0.826087
RAC875_c19259_1902	0.945205	0.983998	0.70796	0.103128	0.051894	0.00177305	0.0323582	0.0335188	0.826087
AX-158533554	0.8546	0.964938	0.75886	0.0794417	0.0519158	0.00460993	0.0317051	0.0330363	0.756643
RFL_Contig5246_1091	0.892643	0.975766	0.774271	0.0728844	0.0521895	0.00319149	0.0297279	0.0314798	0.740255
AX-94674935	0.894144	0.979964	0.810727	0.0583653	0.0522384	0.00319149	0.0301494	0.0315199	0.816646
BS00073124_51	0.89001	0.956679	0.606132	0.162452	0.0522484	0.0035461	0.0322403	0.0335495	0.762595
AX-108749699	0.830742	0.957435	0.748518	0.0839932	0.0522967	0.00496454	0.0293311	0.0306431	0.692636
Ex_c101666_634	0.942192	0.991156	0.847021	0.0451522	0.0523092	0.00177305	0.0306711	0.0323388	0.850932
Excalibur_c60612_236	0.945709	0.984068	0.706553	0.10383	0.0523154	0.00177305	0.0326582	0.0342154	0.826087
Tdurum_contig11827_738	0.945709	0.984068	0.706553	0.10383	0.0523154	0.00177305	0.0326582	0.0342154	0.826087
Tdurum_contig98005_272	0.945709	0.984068	0.706553	0.10383	0.0523154	0.00177305	0.0326582	0.0342154	0.826087
AX-108775900	0.945709	0.983259	0.691652	0.111454	0.0523154	0.00177305	0.0326582	0.0342154	0.826087
AX-158539580	0.945709	0.983259	0.691652	0.111454	0.0523154	0.00177305	0.0326582	0.0342154	0.826087
AX-94474044	0.945709	0.983259	0.691652	0.111454	0.0523154	0.00177305	0.0326582	0.0342154	0.826087
Excalibur_c48448_279	0.945709	0.983259	0.691652	0.111454	0.0523154	0.00177305	0.0326582	0.0342154	0.826087
Ku_c203_584	0.945709	0.983259	0.691652	0.111454	0.0523154	0.00177305	0.0326582	0.0342154	0.826087
Kukri_rep_c72901_271	0.945709	0.983259	0.691652	0.111454	0.0523154	0.00177305	0.0326582	0.0342154	0.826087
Ra_c26852_560	0.945709	0.983259	0.691652	0.111454	0.0523154	0.00177305	0.0326582	0.0342154	0.826087
Tdurum_contig42423_1536	0.945709	0.983259	0.691652	0.111454	0.0523154	0.00177305	0.0326582	0.0342154	0.826087
Tdurum_contig42423_1963	0.945709	0.983259	0.691652	0.111454	0.0523154	0.00177305	0.0326582	0.0342154	0.826087
Tdurum_contig43954_2291	0.945709	0.983259	0.691652	0.111454	0.0523154	0.00177305	0.0326582	0.0342154	0.826087
RAC875_c37183_331	0.799105	0.951595	0.759055	0.0793571	0.0523274	0.00591017	0.0294192	0.0308501	0.689593
BS00007437_51	0.94291	0.983307	0.707594	0.10331	0.052334	0.00177305	0.0310574	0.0328843	0.850932
AX-94501544	0.870574	0.966292	0.739562	0.0880379	0.052357	0.00425532	0.0328783	0.0345731	0.814815
AX-94557244	0.857888	0.948203	0.635518	0.14338	0.0524054	0.00443262	0.0311911	0.0324082	0.698551
IAAV3806	0.507401	0.925968	0.849711	0.0442177	0.0524251	0.0143026	0.029035	0.0306902	0.453279
AX-95154820	0.291698	0.770128	0.67546	0.120118	0.0524656	0.0230496	0.0325421	0.0343695	0.492754
AX-94574485	0.293068	0.785751	0.696931	0.108716	0.0525222	0.0205083	0.0290103	0.0305039	0.266242
AX-94758742	0.293068	0.785751	0.696931	0.108716	0.0525222	0.0205083	0.0290103	0.0305039	0.266242
AX-95206509	0.293068	0.785751	0.696931	0.108716	0.0525222	0.0205083	0.0290103	0.0305039	0.266242
Kukri_c30643_112	0.293068	0.785751	0.696931	0.108716	0.0525222	0.0205083	0.0290103	0.0305039	0.266242
Kukri_c8405_1394	0.946067	0.983675	0.697301	0.108525	0.0525333	0.00177305	0.0328753	0.0344364	0.826087
wsnp_Ex_c17176_25816766	0.946067	0.983675	0.697301	0.108525	0.0525333	0.00177305	0.0328753	0.0344364	0.826087
BS00072156_51	0.883748	0.961829	0.671653	0.122216	0.052582	0.0035461	0.0305034	0.0318343	0.79651
wsnp_Ex_c7280_12498193	0.719851	0.930824	0.753075	0.0819723	0.052597	0.00904255	0.0322776	0.0336762	0.624774
AX-158526078	0.866563	0.955724	0.668186	0.124148	0.0526738	0.00443262	0.0332189	0.0348036	0.777602
wsnp_Ku_c6464_11320381	0.866563	0.955724	0.668186	0.124148	0.0526738	0.00443262	0.0332189	0.0348036	0.777602
wsnp_BF474862A_Ta_2_1	0.843339	0.976388	0.849278	0.0443677	0.0527324	0.00496454	0.0316896	0.0332683	0.648727
Jagger_rep_c10288_53	0.945556	0.975019	0.541165	0.211966	0.0528281	0.00177305	0.0325663	0.0342238	0.826087
AX-158558043	0.886673	0.965486	0.695448	0.10948	0.0529298	0.0035461	0.0312908	0.0328817	0.79651
Excalibur_c44487_642	0.943808	0.983868	0.712906	0.100677	0.0529505	0.00177305	0.0315533	0.0329433	0.850932
IAAV3791	0.943808	0.983868	0.712906	0.100677	0.0529505	0.00177305	0.0315533	0.0329433	0.850932
Tdurum_contig44139_1033	0.943808	0.983868	0.712906	0.100677	0.0529505	0.00177305	0.0315533	0.0329433	0.850932
wsnp_Ku_c23598_33524490	0.943037	0.986081	0.75564	0.0808453	0.0529801	0.00177305	0.0311266	0.0326991	0.850932
AX-94433968	0.942789	0.986446	0.763087	0.0776168	0.0530307	0.00177305	0.0309913	0.0325406	0.850932
TGWA25K-TG0290	0.942789	0.981005	0.667981	0.124262	0.0530307	0.00177305	0.0309913	0.0325406	0.850932
AX-158536729	0.942735	0.986133	0.757846	0.0798821	0.0530465	0.00177305	0.030962	0.032714	0.850932
AX-158536736	0.942735	0.986133	0.757846	0.0798821	0.0530465	0.00177305	0.030962	0.032714	0.850932
wsnp_JD_c1316_1891903	0.942735	0.986133	0.757846	0.0798821	0.0530465	0.00177305	0.030962	0.032714	0.850932
Kukri_rep_c85389_715	0.900144	0.977322	0.77289	0.0734614	0.0530467	0.00319149	0.0319608	0.0332903	0.703148
AX-158557796	0.606607	0.923302	0.805033	0.0605461	0.0530902	0.0115248	0.029296	0.0308375	0.412198
AX-94805521	0.606607	0.923302	0.805033	0.0605461	0.0530902	0.0115248	0.029296	0.0308375	0.412198
BS00064956_51	0.606607	0.923302	0.805033	0.0605461	0.0530902	0.0115248	0.029296	0.0308375	0.412198
RAC875_c36432_172	0.606607	0.923302	0.805033	0.0605461	0.0530902	0.0115248	0.029296	0.0308375	0.412198
Kukri_c12368_82	0.898613	0.979265	0.795485	0.0642738	0.0531043	0.00319149	0.0314783	0.0331037	0.703148
Tdurum_contig45255_3473	0.898613	0.979265	0.795485	0.0642738	0.0531043	0.00319149	0.0314783	0.0331037	0.703148
AX-111665196	0.944096	0.983668	0.707853	0.10318	0.053114	0.00177305	0.0317161	0.0331091	0.850932
IAAV5819	0.822958	0.971583	0.839489	0.0478001	0.0531616	0.00531915	0.0300445	0.0314636	0.916667
Kukri_c39981_381	0.942678	0.984723	0.733477	0.0908421	0.05321	0.00177305	0.0309316	0.0325308	0.850932
Kukri_c7495_824	0.942678	0.984723	0.733477	0.0908421	0.05321	0.00177305	0.0309316	0.0325308	0.850932
wsnp_Ex_c15325_23565935	0.881832	0.982334	0.850499	0.0439452	0.0532372	0.0035461	0.0300089	0.031413	0.821946
AX-158548186	0.803549	0.952715	0.759306	0.0792482	0.0532448	0.00620567	0.0315889	0.0334764	0.737902
BS00023092_51	0.942893	0.98895	0.806508	0.0599782	0.0532988	0.00177305	0.0310477	0.0324493	0.850932
BS00036878_51	0.942893	0.98895	0.806508	0.0599782	0.0532988	0.00177305	0.0310477	0.0324493	0.850932
Excalibur_c56264_188	0.942893	0.98895	0.806508	0.0599782	0.0532988	0.00177305	0.0310477	0.0324493	0.850932
wsnp_Ra_c7969_13600474	0.558754	0.822175	0.596995	0.168764	0.0533045	0.0140071	0.0317444	0.0332608	0.376555
IAAV1797	0.881768	0.973665	0.777255	0.0716447	0.0535615	0.00378251	0.0319924	0.0337684	0.812656
RAC875_c6649_642	0.893863	0.968453	0.702773	0.105733	0.0535661	0.0035461	0.0334105	0.0350169	0.762595
BS00065264_51	0.858316	0.973109	0.810203	0.0585645	0.0536213	0.00443262	0.0312854	0.0327581	0.793197
TA005284-0990	0.825801	0.977817	0.872657	0.0364813	0.0536232	0.00549645	0.0315526	0.0327807	0.608046
AX-94629896	0.803275	0.960252	0.797952	0.063302	0.0536387	0.00620567	0.0315449	0.0328718	0.644129
AX-158565198	0.558127	0.941437	0.867466	0.0381959	0.0536656	0.0140071	0.0316993	0.0333148	0.391073
BS00026916_51	0.558127	0.941437	0.867466	0.0381959	0.0536656	0.0140071	0.0316993	0.0333148	0.391073
IAAV8042	0.558127	0.941437	0.867466	0.0381959	0.0536656	0.0140071	0.0316993	0.0333148	0.391073
AX-94816599	0.820179	0.969618	0.831044	0.0508264	0.0536834	0.00555556	0.0308948	0.0322622	0.607902
Ex_c19516_3687	0.779364	0.936756	0.713355	0.100456	0.053742	0.0070922	0.0321443	0.0335741	0.687666
AX-94397938	0.8719	0.961464	0.699171	0.107566	0.0537748	0.00430598	0.0336141	0.0352241	0.749896
wsnp_Ku_c34980_44256215	0.86042	0.960574	0.717541	0.0984123	0.0537926	0.00443262	0.0317569	0.0332553	0.698551
AX-158526927	0.429598	0.898566	0.822171	0.0540729	0.0538401	0.0169622	0.0297372	0.0313507	0.444296
RAC875_c7630_1383	0.429598	0.898566	0.822171	0.0540729	0.0538401	0.0169622	0.0297372	0.0313507	0.444296
AX-109832564	0.947389	0.977729	0.576692	0.183507	0.0538731	0.00177305	0.033701	0.0351871	0.826087
Kukri_c28117_583	0.947389	0.977729	0.576692	0.183507	0.0538731	0.00177305	0.033701	0.0351871	0.826087
AX-158567842	0.827286	0.97732	0.868687	0.0377908	0.0538977	0.00549645	0.031824	0.033057	0.608046
Tdurum_contig28884_379	0.827286	0.97732	0.868687	0.0377908	0.0538977	0.00549645	0.031824	0.033057	0.608046
AX-95157942	0.868994	0.958544	0.683559	0.115733	0.0539038	0.00443262	0.0338353	0.0355025	0.757711
wsnp_Ku_c12037_19549078	0.561254	0.828248	0.608539	0.16082	0.0539245	0.0140071	0.0319253	0.0333329	0.376555
AX-158548742	0.794594	0.948419	0.748882	0.0838309	0.0539333	0.00650118	0.0316504	0.03336	0.690217
AX-158561893	0.469414	0.838917	0.696405	0.108986	0.0540557	0.016253	0.0306321	0.0322037	0.405131
Ex_c7593_754	0.380985	0.800955	0.678449	0.118487	0.0540922	0.0187352	0.0302662	0.0318144	0.313861
AX-158531993	0.84053	0.977623	0.859677	0.0408068	0.054103	0.00496454	0.0311316	0.0329445	0.692636
TA005615-0600	0.901107	0.968386	0.680317	0.117476	0.0541336	0.00319149	0.0322722	0.033986	0.816646
RAC875_c68849_153	0.822978	0.969415	0.827228	0.0522141	0.0541901	0.00555556	0.0313833	0.0327595	0.607902
wsnp_Ex_c56091_58346859	0.822978	0.969415	0.827228	0.0522141	0.0541901	0.00555556	0.0313833	0.0327595	0.607902
Kukri_c49927_151	0.895892	0.967682	0.689576	0.112542	0.0542289	0.0035461	0.0340619	0.03568	0.762595
CAP11_c1206_301	0.322234	0.782645	0.679307	0.118022	0.054292	0.0205083	0.0302586	0.031775	0.266242
Ex_c8482_488	0.322234	0.782645	0.679307	0.118022	0.054292	0.0205083	0.0302586	0.031775	0.266242
IAAV894	0.322234	0.782645	0.679307	0.118022	0.054292	0.0205083	0.0302586	0.031775	0.266242
IACX8190	0.322234	0.782645	0.679307	0.118022	0.054292	0.0205083	0.0302586	0.031775	0.266242
wsnp_Ku_rep_c68351_67302372	0.322234	0.782645	0.679307	0.118022	0.054292	0.0205083	0.0302586	0.031775	0.266242
Excalibur_c1845_4911	0.944938	0.984247	0.713915	0.100182	0.0543488	0.00177305	0.0322007	0.0337769	0.850932
AX-94588421	0.832966	0.975973	0.856156	0.042003	0.0543548	0.00555556	0.0332601	0.0351571	0.663588
Tdurum_contig67690_183	0.740735	0.938694	0.763537	0.0774234	0.0543656	0.00827423	0.0319142	0.0336642	0.635796
CAP11_c5598_321	0.896388	0.967282	0.684225	0.115377	0.0543924	0.0035461	0.0342247	0.0358458	0.762595
Excalibur_c32735_603	0.896388	0.967282	0.684225	0.115377	0.0543924	0.0035461	0.0342247	0.0358458	0.762595
wsnp_BE442666A_Ta_2_1	0.896388	0.967282	0.684225	0.115377	0.0543924	0.0035461	0.0342247	0.0358458	0.762595
RAC875_c38003_164	0.896388	0.966448	0.676174	0.119727	0.0543924	0.0035461	0.0342247	0.0358458	0.762595
AX-158525667	0.919978	0.980998	0.762539	0.0778519	0.0544403	0.00265957	0.0332357	0.0350698	0.847619
Excalibur_c38433_291	0.919978	0.980998	0.762539	0.0778519	0.0544403	0.00265957	0.0332357	0.0350698	0.847619
IAAV475	0.919978	0.980998	0.762539	0.0778519	0.0544403	0.00265957	0.0332357	0.0350698	0.847619
AX-158564625	0.732258	0.89886	0.622247	0.15177	0.0544707	0.00898345	0.0335527	0.0351793	0.627315
Excalibur_c14999_712	0.944768	0.985989	0.746328	0.0849731	0.0545277	0.00177305	0.0321018	0.0338746	0.850932
AX-158567784	0.885258	0.981365	0.837591	0.0484751	0.0546307	0.0035461	0.030905	0.0324987	0.73913
Jagger_c2876_255	0.855464	0.9645	0.754385	0.081396	0.0546622	0.00443262	0.0306679	0.0323352	0.736232
AX-109865770	0.904505	0.981361	0.804818	0.0606292	0.0547395	0.00319149	0.0334205	0.0349953	0.703148
AX-94448564	0.904505	0.981361	0.804818	0.0606292	0.0547395	0.00319149	0.0334205	0.0349953	0.703148
AX-95258779	0.904505	0.981361	0.804818	0.0606292	0.0547395	0.00319149	0.0334205	0.0349953	0.703148
wsnp_Ex_c6381_11093111	0.904505	0.976501	0.753928	0.0815965	0.0547395	0.00319149	0.0334205	0.0349953	0.703148
wsnp_Ku_c10515_17368422	0.904505	0.976501	0.753928	0.0815965	0.0547395	0.00319149	0.0334205	0.0349953	0.703148
Excalibur_c46399_307	0.947661	0.989772	0.804589	0.0607175	0.0548458	0.00177305	0.0338764	0.0355305	0.936508
AX-94917376	0.769655	0.943958	0.756706	0.0803793	0.0548889	0.0072695	0.0315592	0.0329221	0.602303
BS00022133_51	0.769655	0.943958	0.756706	0.0803793	0.0548889	0.0072695	0.0315592	0.0329221	0.602303
wsnp_CAP11_c631_419930	0.769655	0.943958	0.756706	0.0803793	0.0548889	0.0072695	0.0315592	0.0329221	0.602303
AX-94589700	0.620877	0.909176	0.760436	0.0787589	0.0549121	0.0128842	0.0339841	0.0359002	0.52587
Excalibur_c18966_1008	0.892818	0.973442	0.752212	0.082353	0.0549417	0.0035461	0.0330849	0.0350721	0.79651
Kukri_c96922_98	0.329639	0.849781	0.775914	0.0722007	0.0549582	0.0207447	0.0309455	0.0327081	0.30561
wsnp_Ex_c25104_34368562	0.329639	0.849781	0.775914	0.0722007	0.0549582	0.0207447	0.0309455	0.0327081	0.30561
Ra_c64159_441	0.948854	0.987978	0.764943	0.0768219	0.0551361	0.00177305	0.0346664	0.0363274	0.826087
AX-158626287	0.948854	0.984004	0.687253	0.113767	0.0551361	0.00177305	0.0346664	0.0363274	0.826087
BS00073125_51	0.948854	0.984004	0.687253	0.113767	0.0551361	0.00177305	0.0346664	0.0363274	0.826087
AX-95630766	0.896026	0.974073	0.750642	0.0830482	0.0551565	0.00319149	0.0306952	0.0323196	0.769115
Kukri_c18017_1696	0.896026	0.974073	0.750642	0.0830482	0.0551565	0.00319149	0.0306952	0.0323196	0.769115
Ra_c24793_726	0.896026	0.974073	0.750642	0.0830482	0.0551565	0.00319149	0.0306952	0.0323196	0.769115
RAC875_c12993_127	0.896026	0.974073	0.750642	0.0830482	0.0551565	0.00319149	0.0306952	0.0323196	0.769115
RAC875_c12993_201	0.896026	0.974073	0.750642	0.0830482	0.0551565	0.00319149	0.0306952	0.0323196	0.769115
RAC875_c45115_509	0.896026	0.974073	0.750642	0.0830482	0.0551565	0.00319149	0.0306952	0.0323196	0.769115
IACX6046	0.946547	0.982654	0.675488	0.120103	0.0551941	0.00177305	0.0331706	0.0349153	0.850932
wsnp_BE403818A_Ta_2_1	0.946547	0.982654	0.675488	0.120103	0.0551941	0.00177305	0.0331706	0.0349153	0.850932
AX-94496850	0.754429	0.943192	0.768669	0.0752375	0.0554307	0.00791962	0.0322498	0.0336491	0.59963
RAC875_c3492_2195	0.852667	0.966975	0.775845	0.0722295	0.0555376	0.00496454	0.0336961	0.03533	0.648727
AX-158570494	0.867658	0.956394	0.670505	0.122853	0.0555934	0.00443262	0.0334937	0.0350237	0.698551
AX-110610231	0.738921	0.938299	0.763668	0.0773673	0.0556159	0.00868794	0.0332771	0.0350504	0.616587
AX-94820753	0.738921	0.938299	0.763668	0.0773673	0.0556159	0.00868794	0.0332771	0.0350504	0.616587
AX-94407210	0.873422	0.958369	0.671108	0.122518	0.0556815	0.00443262	0.0350189	0.0367324	0.75873
Ex_c2725_1442	0.915389	0.984115	0.812263	0.0577821	0.0557564	0.00265957	0.0314329	0.0334244	0.866667
IAAV2366	0.915389	0.984115	0.812263	0.0577821	0.0557564	0.00265957	0.0314329	0.0334244	0.866667
TA001473-0980	0.915389	0.984115	0.812263	0.0577821	0.0557564	0.00265957	0.0314329	0.0334244	0.866667
TGWA25K-TG0313	0.915389	0.984115	0.812263	0.0577821	0.0557564	0.00265957	0.0314329	0.0334244	0.866667
RAC875_c16993_196	0.346838	0.779443	0.662323	0.127459	0.0557732	0.0205083	0.0313985	0.0329355	0.266242
IAAV2002	0.89342	0.965385	0.675218	0.120251	0.0558207	0.0035461	0.0332716	0.0349864	0.79651
Tdurum_contig53340_953	0.89342	0.965385	0.675218	0.120251	0.0558207	0.0035461	0.0332716	0.0349864	0.79651
Kukri_rep_c70103_146	0.89342	0.976673	0.781133	0.0700478	0.0558207	0.0035461	0.0332716	0.0349864	0.79651
BS00023200_51	0.89342	0.972804	0.744834	0.0856455	0.0558207	0.0035461	0.0332716	0.0349864	0.79651
Tdurum_contig30451_88	0.405506	0.798014	0.66024	0.12865	0.055862	0.0187352	0.0315145	0.0330855	0.313861
Tdurum_contig70639_196	0.950028	0.98297	0.659208	0.129243	0.0559625	0.00177305	0.0354806	0.0371564	0.826087
Tdurum_contig17697_675	0.949286	0.984442	0.693228	0.110632	0.0559838	0.00177305	0.0349619	0.0366358	0.936508
AX-158581587	0.958706	0.988571	0.723226	0.0956732	0.0559946	0.00141844	0.0343501	0.036243	0.852217
BobWhite_c30622_180	0.950104	0.983188	0.66306	0.12704	0.0560168	0.00177305	0.0355349	0.0372116	0.826087
Ku_c101932_436	0.875977	0.967699	0.739555	0.0880413	0.0560977	0.00413712	0.0333578	0.0351678	0.793789
AX-94413096	0.883973	0.97711	0.802715	0.0614431	0.0561009	0.00407801	0.035147	0.0372258	0.782222
AX-110500701	0.900369	0.957203	0.570446	0.188253	0.0561652	0.0035461	0.0355923	0.0370357	0.762595
AX-158573942	0.900369	0.957203	0.570446	0.188253	0.0561652	0.0035461	0.0355923	0.0370357	0.762595
AX-108930776	0.85855	0.984838	0.892813	0.030014	0.0562235	0.00443262	0.0313369	0.0330692	0.765539
AX-158542981	0.85855	0.984838	0.892813	0.030014	0.0562235	0.00443262	0.0313369	0.0330692	0.765539
BS00099986_51	0.85855	0.984838	0.892813	0.030014	0.0562235	0.00443262	0.0313369	0.0330692	0.765539
Excalibur_c98205_83	0.624331	0.956114	0.883178	0.0330686	0.0562288	0.0124704	0.0331953	0.0350587	0.33568
wsnp_JD_rep_c48755_32989025	0.947329	0.986509	0.743858	0.0860857	0.0563005	0.00177305	0.0336626	0.035537	0.850932
wsnp_JD_c1845_2564931	0.360976	0.753344	0.61401	0.157159	0.0563493	0.0230496	0.0360701	0.0378782	0.492754
BS00063744_51	0.63373	0.870547	0.646565	0.136659	0.0563519	0.012234	0.0334017	0.0350248	0.525624
RAC875_c42206_305	0.947495	0.981773	0.652852	0.132935	0.0563554	0.00177305	0.0337694	0.0353425	0.850932
TGWA25K-TG0292	0.947495	0.981773	0.652852	0.132935	0.0563554	0.00177305	0.0337694	0.0353425	0.850932
wsnp_Ku_c663_1368085	0.625348	0.923944	0.796996	0.0636778	0.0563684	0.0115248	0.0307614	0.0323296	0.470978
IACX3911	0.894164	0.971635	0.731988	0.0915356	0.0564412	0.0035461	0.0335055	0.0353393	0.79651
Tdurum_contig49576_134	0.894164	0.971635	0.731988	0.0915356	0.0564412	0.0035461	0.0335055	0.0353393	0.79651
Ku_c5969_1667	0.828785	0.979788	0.881948	0.0334635	0.0564722	0.00549645	0.0321026	0.0333496	0.651596
Kukri_rep_c101316_375	0.948369	0.986568	0.739845	0.0879084	0.0565118	0.00177305	0.0343408	0.0363827	0.850932
wsnp_Ex_c1269_2435294	0.852341	0.950264	0.663172	0.126976	0.05653	0.00496454	0.0336216	0.0353281	0.762224
RAC875_rep_c91134_949	0.93744	0.987353	0.797849	0.0633423	0.0566152	0.00236407	0.0377885	0.0397026	0.944615
wsnp_BG274584B_Ta_2_3	0.93744	0.987353	0.797849	0.0633423	0.0566152	0.00236407	0.0377885	0.0397026	0.944615
Kukri_c52413_282	0.950279	0.973434	0.465706	0.28682	0.0566383	0.00177305	0.0356601	0.0373739	0.826087
Kukri_rep_c104879_103	0.950214	0.989153	0.782128	0.0696409	0.0566466	0.00177305	0.0356133	0.0372989	0.936508
Tdurum_contig62941_85	0.950214	0.989153	0.782128	0.0696409	0.0566466	0.00177305	0.0356133	0.0372989	0.936508
BobWhite_rep_c63332_67	0.894793	0.977603	0.787114	0.067616	0.0566808	0.0035461	0.0337058	0.0351767	0.79651
AX-108753174	0.897557	0.967004	0.67791	0.11878	0.056878	0.0035461	0.0346153	0.0364278	0.79651
AX-158573311	0.367609	0.776139	0.646008	0.136992	0.0570307	0.0205083	0.0324297	0.0339855	0.266242
IAAV1677	0.367609	0.776139	0.646008	0.136992	0.0570307	0.0205083	0.0324297	0.0339855	0.266242
RAC875_c5744_115	0.796773	0.947675	0.74253	0.0866866	0.0570461	0.00691489	0.0340255	0.0357479	0.688889
wsnp_JD_c18695_17091254	0.585479	0.868371	0.682455	0.116324	0.0570978	0.0135934	0.032793	0.0345087	0.538464
AX-94432751	0.897041	0.97318	0.739509	0.0880622	0.0571384	0.0035461	0.0344418	0.0364537	0.79651
AX-158598300	0.343941	0.795464	0.688235	0.113248	0.0571945	0.022923	0.0349405	0.0368791	0.503914
IACX5800	0.946137	0.988793	0.791926	0.065686	0.0571975	0.00177305	0.0329178	0.034576	0.869565
wsnp_Ex_c1149_2206471	0.920432	0.990295	0.878031	0.0347281	0.0572003	0.00265957	0.0334253	0.0348089	0.866667
AX-158523146	0.875698	0.950836	0.60448	0.163578	0.0572165	0.00443262	0.0356602	0.0373971	0.868132
Tdurum_contig31139_79	0.453123	0.77454	0.587732	0.175364	0.0572292	0.0187352	0.0342586	0.0358046	0.310488
AX-110579601	0.951366	0.98181	0.625981	0.149373	0.0572609	0.00177305	0.0364569	0.0381707	0.936508
Tdurum_contig76559_124	0.951366	0.98181	0.625981	0.149373	0.0572609	0.00177305	0.0364569	0.0381707	0.936508
AX-94710242	0.630218	0.923809	0.793956	0.064879	0.0573335	0.0123522	0.0334041	0.034847	0.418677
AX-158545828	0.426257	0.854705	0.746759	0.0847801	0.0573432	0.0187352	0.0326544	0.034246	0.313861
Ra_c71628_188	0.426257	0.79498	0.642663	0.139006	0.0573432	0.0187352	0.0326544	0.034246	0.313861
AX-158604892	0.946213	0.989055	0.796521	0.063865	0.0573796	0.00177305	0.0329642	0.0348349	0.869565
wsnp_Ex_c2103_3947695	0.946213	0.989055	0.796521	0.063865	0.0573796	0.00177305	0.0329642	0.0348349	0.869565
Tdurum_contig56175_791	0.30677	0.832055	0.757735	0.0799307	0.0574014	0.0219267	0.0316298	0.0331934	0.232828
Jagger_c9554_114	0.948979	0.992065	0.844473	0.0460425	0.0574313	0.00177305	0.0347511	0.0364783	0.850932
wsnp_Ex_c16627_25162391	0.948979	0.992065	0.844473	0.0460425	0.0574313	0.00177305	0.0347511	0.0364783	0.850932
IAAV7352	0.434303	0.763419	0.581789	0.179709	0.0574379	0.0194951	0.0344621	0.0360119	0.299603
BS00066039_51	0.961737	0.989586	0.727834	0.0934849	0.0576071	0.00141844	0.0370704	0.0387375	0.827586
RFL_Contig3885_1183	0.961737	0.989586	0.727834	0.0934849	0.0576071	0.00141844	0.0370704	0.0387375	0.827586
RFL_Contig622_1601	0.875368	0.968151	0.744455	0.0858162	0.0576116	0.00413712	0.0331948	0.0350781	0.737212
AX-158565563	0.86925	0.982813	0.868547	0.0378369	0.0576581	0.00443262	0.0339015	0.0354548	0.736232
AX-158538360	0.949153	0.985538	0.715575	0.0993693	0.0577664	0.00177305	0.03487	0.036693	0.850932
Kukri_c49010_266	0.884253	0.979924	0.826553	0.0524609	0.0577746	0.00413712	0.0357426	0.0377607	0.811371
Kukri_rep_c101529_1199	0.884253	0.979924	0.826553	0.0524609	0.0577746	0.00413712	0.0357426	0.0377607	0.811371
AX-158598372	0.949054	0.986373	0.732527	0.0912844	0.0577817	0.00177305	0.0348025	0.0366975	0.850932
AX-94993597	0.827762	0.969415	0.822429	0.0539776	0.0578283	0.00555556	0.032255	0.0337024	0.651468
AX-158526868	0.889891	0.976787	0.789183	0.0667834	0.0578541	0.0035461	0.0322052	0.0337611	0.84173
GENE-1074_108	0.905422	0.982898	0.819173	0.0551857	0.0578697	0.00319149	0.0337444	0.0356366	0.740255
AX-94721178	0.863288	0.953754	0.661725	0.127801	0.057931	0.00460993	0.0337201	0.0352271	0.735637
AX-94393137	0.96012	0.987346	0.682704	0.116191	0.0579547	0.00141844	0.0355674	0.0370917	0.852217
AX-158585756	0.962125	0.989684	0.727635	0.0935791	0.0579955	0.00141844	0.0374503	0.0391243	0.827586
wsnp_Ex_c3019_5578488	0.962125	0.989684	0.727635	0.0935791	0.0579955	0.00141844	0.0374503	0.0391243	0.827586
BS00022505_51	0.822527	0.977587	0.873713	0.0361352	0.0580572	0.00585106	0.0329687	0.0346093	0.650597
AX-158623698	0.908494	0.96751	0.644943	0.137631	0.0581001	0.00319149	0.0348775	0.0366387	0.816646
GENE-1724_72	0.385104	0.772728	0.63039	0.14658	0.0581022	0.0205083	0.0333524	0.034925	0.266242
TA004478-0271	0.385104	0.772728	0.63039	0.14658	0.0581022	0.0205083	0.0333524	0.034925	0.266242
Tdurum_contig15512_429	0.385104	0.772728	0.63039	0.14658	0.0581022	0.0205083	0.0333524	0.034925	0.266242
BobWhite_c2022_245	0.756793	0.944872	0.773328	0.0732783	0.0581674	0.00868794	0.0357224	0.0372908	0.539821
Tdurum_contig47550_699	0.842999	0.976047	0.847433	0.0450087	0.0581704	0.00531915	0.0338798	0.0354904	0.733333
IAAV3315	0.826922	0.94419	0.677546	0.118979	0.0581891	0.00591017	0.0341474	0.0359689	0.689593
RAC875_c42866_1323	0.865934	0.983025	0.873386	0.0362424	0.058226	0.00443262	0.033063	0.034683	0.765539
AX-94416076	0.546321	0.923128	0.830559	0.0510021	0.0582337	0.0159574	0.0351734	0.0369892	0.771429
RAC875_c29431_1849	0.881684	0.960449	0.665715	0.125536	0.058243	0.00443262	0.0374643	0.0392182	0.777602
AX-158624695	0.869472	0.96842	0.758062	0.0797885	0.0582542	0.00443262	0.0339592	0.0356135	0.736232
AX-158584816	0.962397	0.990146	0.737937	0.0887822	0.0582699	0.00141844	0.0377217	0.0394006	0.827586
BobWhite_rep_c63940_205	0.951764	0.986038	0.710539	0.101845	0.0583375	0.00177305	0.0367576	0.038605	0.936508
IAAV5564	0.913369	0.974272	0.703022	0.105608	0.0583781	0.00319149	0.0368399	0.038477	0.703148
wsnp_Ex_c15490_23776560	0.913369	0.974272	0.703022	0.105608	0.0583781	0.00319149	0.0368399	0.038477	0.703148
Excalibur_c15744_322	0.924773	0.980295	0.738066	0.0887229	0.0583792	0.00265957	0.0353538	0.0369905	0.847619
BS00087279_51	0.958115	0.993411	0.842693	0.0466678	0.0584538	0.00141844	0.0338652	0.0355314	0.87069
BobWhite_c40424_143	0.949992	0.986775	0.735545	0.0898841	0.0584601	0.00177305	0.0354555	0.0372473	0.850932
AX-110943874	0.920905	0.98798	0.848036	0.0447987	0.0585354	0.00265957	0.0336251	0.0354287	0.866667
AX-94558187	0.920905	0.98798	0.848036	0.0447987	0.0585354	0.00265957	0.0336251	0.0354287	0.866667
AX-94385458	0.950364	0.990083	0.800213	0.0624167	0.0585679	0.00177305	0.0357212	0.0375048	0.850932
AX-94619572	0.536406	0.828514	0.630096	0.146765	0.0585845	0.0158983	0.0342937	0.0360012	0.405491
AX-108740634	0.889189	0.982999	0.846575	0.0453075	0.0585857	0.00378251	0.0341349	0.035905	0.738337
AX-158566608	0.889189	0.982999	0.846575	0.0453075	0.0585857	0.00378251	0.0341349	0.035905	0.738337
AX-158590267	0.894706	0.97434	0.756304	0.0805551	0.0586108	0.00378251	0.0359233	0.0378384	0.812656
Kukri_rep_c98227_230	0.894706	0.97434	0.756304	0.0805551	0.0586108	0.00378251	0.0359233	0.0378384	0.812656
Tdurum_contig17062_221	0.894706	0.97434	0.756304	0.0805551	0.0586108	0.00378251	0.0359233	0.0378384	0.812656
wsnp_Ku_c4296_7807837	0.652842	0.883761	0.665168	0.125845	0.0586678	0.0118203	0.0340489	0.0358192	0.586083
AX-94503507	0.797485	0.947946	0.742964	0.0864899	0.0587007	0.0070922	0.0350207	0.0367418	0.734589
TA001426-0323	0.641178	0.957363	0.881175	0.0337121	0.0587326	0.012234	0.0340951	0.0357402	0.584921
AX-110535012	0.749989	0.927559	0.710247	0.10199	0.0587702	0.00886525	0.0354595	0.0373288	0.633245
AX-94608213	0.924082	0.97549	0.677152	0.119193	0.0588163	0.00265957	0.0350323	0.0365643	0.866667
BS00070091_51	0.949425	0.988112	0.764951	0.0768183	0.0588467	0.00177305	0.035058	0.0368789	0.869565
Tdurum_contig100787_79	0.651484	0.886776	0.675125	0.120302	0.0588874	0.0118203	0.0339162	0.0356626	0.668899
AX-89551965	0.7317	0.928618	0.733947	0.0906239	0.0589076	0.00916076	0.0341437	0.0360196	0.595607
IAAV1382	0.7317	0.928618	0.733947	0.0906239	0.0589076	0.00916076	0.0341437	0.0360196	0.595607
BS00049793_51	0.872727	0.970426	0.76763	0.0756778	0.0590249	0.00443262	0.0348276	0.0368167	0.833202
BS00037462_51	0.476233	0.899948	0.808977	0.0590324	0.0590514	0.0169622	0.032385	0.0340898	0.506041
AX-94463677	0.609436	0.863096	0.64947	0.134929	0.0590654	0.0134161	0.0343505	0.0360669	0.456718
AX-158575334	0.859812	0.970732	0.791223	0.0659666	0.0590837	0.00496454	0.0354135	0.0373864	0.692636
RAC875_c37837_889	0.913524	0.977391	0.738547	0.0885026	0.0591263	0.00319149	0.036906	0.0386301	0.703148
AX-158548038	0.89661	0.969472	0.704734	0.104744	0.0591446	0.0035461	0.0342981	0.0359912	0.821946
AX-108881562	0.950984	0.985219	0.698443	0.107939	0.0591623	0.00177305	0.0361726	0.0380194	0.850932
BS00082644_51	0.950984	0.985219	0.698443	0.107939	0.0591623	0.00177305	0.0361726	0.0380194	0.850932
BS00090945_51	0.950984	0.985219	0.698443	0.107939	0.0591623	0.00177305	0.0361726	0.0380194	0.850932
RAC875_c55214_932	0.950984	0.985219	0.698443	0.107939	0.0591623	0.00177305	0.0361726	0.0380194	0.850932
RAC875_rep_c72670_558	0.734161	0.915533	0.682263	0.116427	0.059236	0.00874704	0.0329036	0.0346894	0.544778
TA004957-0405	0.914348	0.983424	0.806468	0.0599936	0.0592902	0.00319149	0.0372612	0.0389823	0.703148
wsnp_Ex_c19454_28409258	0.893381	0.981357	0.825144	0.0529774	0.0593401	0.0035461	0.0332595	0.0349285	0.84173
wsnp_Ex_c35545_43677576	0.893381	0.981357	0.825144	0.0529774	0.0593401	0.0035461	0.0332595	0.0349285	0.84173
wsnp_Ku_c27273_37219950	0.893381	0.981357	0.825144	0.0529774	0.0593401	0.0035461	0.0332595	0.0349285	0.84173
AX-108793870	0.897741	0.977843	0.783322	0.0691534	0.0593483	0.0035461	0.0346777	0.0366129	0.821946
AX-89635156	0.897741	0.977843	0.783322	0.0691534	0.0593483	0.0035461	0.0346777	0.0366129	0.821946
AX-95205468	0.897741	0.977843	0.783322	0.0691534	0.0593483	0.0035461	0.0346777	0.0366129	0.821946
RAC875_c25339_200	0.831241	0.943271	0.663846	0.126594	0.0594211	0.00620567	0.0367723	0.0385607	0.644129
Excalibur_c1208_72	0.898997	0.974519	0.74772	0.0843496	0.0594588	0.0035461	0.0351088	0.0370881	0.821946
AX-158567797	0.607381	0.895546	0.733957	0.0906195	0.0594613	0.0136525	0.0347728	0.0364432	0.45561
Ku_c16895_793	0.607381	0.895546	0.733957	0.0906195	0.0594613	0.0136525	0.0347728	0.0364432	0.45561
Kukri_c57593_79	0.191304	0.805383	0.759345	0.0792313	0.0594765	0.0279635	0.0345786	0.0361527	0.276153
wsnp_Ex_rep_c103087_88123733	0.674353	0.913436	0.734178	0.0905167	0.0594802	0.0113475	0.0348461	0.0367984	0.587819
Kukri_c8595_953	0.763796	0.950904	0.792145	0.0655988	0.0594852	0.00791962	0.0335288	0.0352812	0.644115
RAC875_c67909_226	0.762258	0.962025	0.84027	0.0475235	0.0595036	0.00821513	0.0345548	0.036104	0.53295
AX-158565595	0.614979	0.923242	0.80064	0.0622501	0.0595088	0.0134161	0.034845	0.0364632	0.456718
GENE-3437_148	0.786076	0.950635	0.769242	0.0749951	0.0595765	0.00732861	0.0342579	0.0360778	0.60914
AX-94936573	0.804194	0.948383	0.736387	0.0894952	0.0595908	0.00679669	0.0347113	0.0366669	0.686232
Excalibur_c50999_269	0.978073	0.993677	0.711627	0.101308	0.0596312	0.000759878	0.0346549	0.0365009	0.955975
Excalibur_c50044_749	0.806547	0.940214	0.690954	0.111819	0.059669	0.0070922	0.0366611	0.0385167	0.687666
AX-158538113	0.754479	0.916846	0.661316	0.128034	0.0596921	0.00868794	0.0353858	0.0373164	0.597343
Kukri_c9387_372	0.754479	0.916846	0.661316	0.128034	0.0596921	0.00868794	0.0353858	0.0373164	0.597343
RAC875_rep_c112008_519	0.754479	0.916846	0.661316	0.128034	0.0596921	0.00868794	0.0353858	0.0373164	0.597343
wsnp_CAP8_c630_456418	0.754479	0.916846	0.661316	0.128034	0.0596921	0.00868794	0.0353858	0.0373164	0.597343
BS00021739_51	0.902058	0.964741	0.640003	0.140623	0.0596952	0.0035461	0.0362061	0.0381622	0.79651
AX-95148023	0.554554	0.901029	0.777815	0.0714131	0.0596955	0.0169622	0.0380791	0.0403361	0.368463
AX-110952216	0.787449	0.952118	0.774725	0.072695	0.0597046	0.00738771	0.0347574	0.0369705	0.726042
AX-110905579	0.871324	0.965493	0.731829	0.09161	0.0597198	0.00460993	0.0358259	0.0372974	0.720414
wsnp_Ex_c8741_14630167	0.871324	0.965493	0.731829	0.09161	0.0597198	0.00460993	0.0358259	0.0372974	0.720414
wsnp_JD_rep_c48797_33040150	0.871324	0.965493	0.731829	0.09161	0.0597198	0.00460993	0.0358259	0.0372974	0.720414
Tdurum_contig10677_529	0.963448	0.984531	0.576797	0.183428	0.0597554	0.00141844	0.0388058	0.0405561	0.827586
wsnp_BE498985A_Ta_2_1	0.963448	0.984531	0.576797	0.183428	0.0597554	0.00141844	0.0388058	0.0405561	0.827586
BobWhite_c47456_121	0.411902	0.765568	0.601372	0.165716	0.0597764	0.0205083	0.0348722	0.0364724	0.266242
AX-86168015	0.615279	0.846639	0.601372	0.165716	0.0597764	0.0134161	0.0348722	0.0365803	0.456718
BS00034554_51	0.957913	0.991796	0.805064	0.0605343	0.0597868	0.00141844	0.0337023	0.0355212	0.885057
Ex_c13421_2094	0.888239	0.961282	0.653564	0.132518	0.0598164	0.00425532	0.0380753	0.0397792	0.814815
Excalibur_c581_947	0.953613	0.982554	0.623897	0.150707	0.0598639	0.00177305	0.0382231	0.0400971	0.936508
AX-108870310	0.920736	0.993118	0.913182	0.0237681	0.0599863	0.00265957	0.0335532	0.0353973	0.954416
AX-158569338	0.960184	0.991932	0.797369	0.0635311	0.0600573	0.00141844	0.035625	0.0370995	0.87069
BS00083511_51	0.672041	0.888927	0.661321	0.128031	0.0601007	0.0115248	0.0351411	0.0369228	0.545756
RAC875_c35807_1110	0.95394	0.987097	0.719865	0.0972874	0.0601384	0.00177305	0.0384945	0.0403734	0.936508
AX-158536737	0.539694	0.826901	0.623948	0.150675	0.0601405	0.0160757	0.0349238	0.0365942	0.447194
AX-110434009	0.739566	0.927881	0.723082	0.0957424	0.0601651	0.00916076	0.035175	0.0370696	0.595607
AX-158526387	0.879965	0.979451	0.828807	0.0516384	0.0602004	0.00413712	0.0344659	0.0363196	0.820028
RFL_Contig487_1286	0.690378	0.895155	0.661376	0.128	0.0602005	0.0109338	0.0353135	0.0371314	0.547988
AX-158623982	0.880171	0.978831	0.823338	0.0536419	0.0602217	0.00425532	0.0355116	0.0375738	0.736761
Tdurum_contig92835_177	0.762547	0.94106	0.751781	0.0825434	0.060278	0.00868794	0.0365881	0.0381591	0.634467
AX-94626335	0.850778	0.970337	0.801214	0.0620267	0.0603215	0.00502364	0.0336656	0.0357885	0.763834
AX-158566130	0.875307	0.973054	0.783898	0.0689189	0.0603331	0.00443262	0.0355482	0.0375539	0.819048
Excalibur_c32711_504	0.875307	0.973054	0.783898	0.0689189	0.0603331	0.00443262	0.0355482	0.0375539	0.819048
AX-94512819	0.869823	0.981347	0.856714	0.0418126	0.0603506	0.00460993	0.0354127	0.0368587	0.654173
Excalibur_c46082_440	0.863364	0.986958	0.90455	0.0263805	0.0603534	0.00443262	0.032441	0.0339817	0.788986
GENE-3343_183	0.863364	0.986958	0.90455	0.0263805	0.0603534	0.00443262	0.032441	0.0339817	0.788986
GENE-4795_75	0.863364	0.986958	0.90455	0.0263805	0.0603534	0.00443262	0.032441	0.0339817	0.788986
wsnp_Ku_c3286_6111360	0.863364	0.986958	0.90455	0.0263805	0.0603534	0.00443262	0.032441	0.0339817	0.788986
Excalibur_c28938_185	0.492659	0.807335	0.620245	0.153067	0.0603534	0.0178487	0.0351809	0.0368754	0.357817
AX-158543703	0.898242	0.97456	0.749997	0.0833345	0.0603806	0.00378251	0.0371716	0.0390562	0.812656
IAAV902	0.899628	0.969118	0.692326	0.111102	0.0604021	0.0035461	0.0353294	0.0370412	0.821946
wsnp_Ex_c36242_44232305	0.421801	0.761806	0.588041	0.17514	0.0604077	0.0205083	0.0354692	0.0370803	0.266242
BS00073411_51	0.952217	0.981297	0.608597	0.160781	0.0604672	0.00177305	0.037106	0.0387671	0.850932
GENE-3318_556	0.778358	0.940382	0.731017	0.0919893	0.0605022	0.00762411	0.0343984	0.0362191	0.608269
wsnp_Ku_rep_c76865_75281903	0.952705	0.984381	0.669765	0.123265	0.060611	0.00177305	0.0374888	0.0392543	0.850932
RAC875_c22429_249	0.916247	0.977729	0.734081	0.0905618	0.0606238	0.00319149	0.0381062	0.0399043	0.703148
wsnp_Ex_rep_c110196_92676847	0.953131	0.985475	0.690096	0.112268	0.0606363	0.00177305	0.0378299	0.0395887	0.850932
Excalibur_c7136_1260	0.912966	0.981023	0.781964	0.0697077	0.0606538	0.00319149	0.0366694	0.038697	0.740255
RFL_Contig2656_871	0.749697	0.96422	0.857055	0.0416966	0.0606662	0.00927896	0.0370709	0.0390371	0.687274
Excalibur_c22768_963	0.952814	0.983926	0.65936	0.129155	0.0606702	0.00177305	0.0375754	0.0393022	0.850932
IACX5994	0.952814	0.983926	0.65936	0.129155	0.0606702	0.00177305	0.0375754	0.0393022	0.850932
wsnp_Ex_c33452_41938013	0.952814	0.983926	0.65936	0.129155	0.0606702	0.00177305	0.0375754	0.0393022	0.850932
wsnp_Ex_c33452_41938159	0.952814	0.983926	0.65936	0.129155	0.0606702	0.00177305	0.0375754	0.0393022	0.850932
BS00108055_51	0.456374	0.822984	0.67438	0.120711	0.0607228	0.0205674	0.0378337	0.0396832	0.381004
TA002215-1444	0.916664	0.974813	0.697761	0.108289	0.0607559	0.00319149	0.0382965	0.0401952	0.703148
RAC875_c37166_408	0.955321	0.981146	0.57802	0.182511	0.0607585	0.00177305	0.0396838	0.041418	0.826087
Ex_c25733_348	0.887007	0.967474	0.71214	0.101055	0.060782	0.00425532	0.0376599	0.0395133	0.84127
AX-158522037	0.904727	0.966155	0.644751	0.137747	0.0608444	0.0035461	0.0372206	0.0390804	0.79651
AX-94907881	0.904727	0.966155	0.644751	0.137747	0.0608444	0.0035461	0.0372206	0.0390804	0.79651
BobWhite_c1654_440	0.591368	0.890991	0.733234	0.0909552	0.0608447	0.0140071	0.034278	0.0360342	0.515099
Tdurum_contig62383_259	0.90203	0.967879	0.672134	0.12195	0.0608668	0.0035461	0.0361957	0.0377779	0.821946
AX-110446404	0.852142	0.967751	0.781893	0.0697367	0.0609635	0.00496454	0.0335764	0.0351795	0.754109
AX-158575298	0.771083	0.938124	0.7297	0.0926063	0.0609851	0.00851064	0.0371779	0.0387359	0.68254
AX-158587205	0.498343	0.871068	0.742989	0.0864789	0.0610427	0.0169622	0.0338123	0.0356226	0.506041
AX-158542163	0.951203	0.987296	0.739657	0.0879945	0.0610446	0.00177305	0.0363355	0.038572	0.869565
AX-95260695	0.841052	0.973914	0.835883	0.0490848	0.0610685	0.00555556	0.0349521	0.0366188	0.651468
Tdurum_contig13653_471	0.62282	0.882753	0.689148	0.112767	0.0611551	0.0135934	0.0360395	0.03776	0.538464
AX-158572595	0.837384	0.983735	0.899978	0.0277846	0.0611653	0.00585106	0.0359809	0.0375472	0.650597
Tdurum_contig8926_1118	0.837384	0.983735	0.899978	0.0277846	0.0611653	0.00585106	0.0359809	0.0375472	0.650597
AX-94446956	0.643028	0.847442	0.572632	0.186581	0.0611774	0.0134161	0.037583	0.0393507	0.473753
wsnp_Ex_c5296_9365847	0.643028	0.847442	0.572632	0.186581	0.0611774	0.0134161	0.037583	0.0393507	0.473753
AX-108831659	0.846705	0.97154	0.814346	0.0569948	0.061178	0.00531915	0.0346988	0.0364282	0.925926
AX-111552047	0.846705	0.97154	0.814346	0.0569948	0.061178	0.00531915	0.0346988	0.0364282	0.925926
IAAV6423	0.846705	0.97154	0.814346	0.0569948	0.061178	0.00531915	0.0346988	0.0364282	0.925926
IAAV6689	0.846705	0.97154	0.814346	0.0569948	0.061178	0.00531915	0.0346988	0.0364282	0.925926
RAC875_c5913_172	0.846705	0.97154	0.814346	0.0569948	0.061178	0.00531915	0.0346988	0.0364282	0.925926
tplb0050m09_1890	0.698266	0.939217	0.798555	0.0630655	0.0611805	0.0105792	0.0350613	0.036776	0.525597
AX-94750793	0.524991	0.792533	0.563236	0.193864	0.0612654	0.0173168	0.0364557	0.0380669	0.380634
TA001855-0472	0.524991	0.792533	0.563236	0.193864	0.0612654	0.0173168	0.0364557	0.0380669	0.380634
AX-158548198	0.838658	0.967085	0.795993	0.064073	0.0613964	0.00555556	0.0344334	0.0361655	0.725082
wsnp_JD_c9360_10216330	0.838658	0.967085	0.795993	0.064073	0.0613964	0.00555556	0.0344334	0.0361655	0.725082
GENE-4208_229	0.850274	0.971845	0.81196	0.0578968	0.0613971	0.00531915	0.0355258	0.0373104	0.762963
Kukri_rep_c70927_886	0.494998	0.826958	0.657344	0.130318	0.061402	0.0183806	0.0363971	0.0380362	0.314985
TA004174-0504	0.494998	0.826958	0.657344	0.130318	0.061402	0.0183806	0.0363971	0.0380362	0.314985
wsnp_Ex_c45213_51068305	0.494998	0.826958	0.657344	0.130318	0.061402	0.0183806	0.0363971	0.0380362	0.314985
wsnp_Ra_c7280_12576178	0.494998	0.826958	0.657344	0.130318	0.061402	0.0183806	0.0363971	0.0380362	0.314985
AX-94603425	0.954985	0.984308	0.651392	0.133794	0.0614084	0.00177305	0.0393883	0.0411713	0.936508
AX-158544988	0.571277	0.932264	0.842005	0.0469103	0.061436	0.0160757	0.0374966	0.0390608	0.462868
BS00104432_51	0.952542	0.985901	0.702924	0.105657	0.0615444	0.00177305	0.0373604	0.0391512	0.945578
AX-109875818	0.6961	0.895155	0.655	0.131679	0.0615457	0.0109338	0.0359784	0.0378407	0.630039
AX-158537087	0.91949	0.986888	0.837133	0.0486382	0.0615632	0.00283688	0.0352364	0.0369498	0.770115
AX-158603677	0.91949	0.986888	0.837133	0.0486382	0.0615632	0.00283688	0.0352364	0.0369498	0.770115
AX-158543510	0.439803	0.749717	0.553224	0.201897	0.0615772	0.0205083	0.0366091	0.0382408	0.266242
wsnp_Ex_c17435_26144201	0.439803	0.749717	0.553224	0.201897	0.0615772	0.0205083	0.0366091	0.0382408	0.266242
Kukri_c4335_775	0.896784	0.978307	0.789833	0.0665225	0.0615779	0.00378251	0.0366466	0.0387329	0.836074
AX-158577637	0.877572	0.982423	0.856428	0.04191	0.0615874	0.00460993	0.0376542	0.0395575	0.722312
Excalibur_c11079_923	0.877572	0.982423	0.856428	0.04191	0.0615874	0.00460993	0.0376542	0.0395575	0.722312
Tdurum_contig60189_310	0.88874	0.962059	0.658985	0.129371	0.061616	0.00413712	0.0371844	0.0385666	0.737212
AX-94499961	0.762227	0.929927	0.705292	0.104463	0.061641	0.00868794	0.0365389	0.0383499	0.597343
AX-158588349	0.961045	0.987889	0.689106	0.112789	0.0617338	0.00141844	0.0364122	0.0381326	0.87069
Jagger_c2853_75	0.961045	0.987889	0.689106	0.112789	0.0617338	0.00141844	0.0364122	0.0381326	0.87069
Tdurum_contig92819_647	0.961045	0.987889	0.689106	0.112789	0.0617338	0.00141844	0.0364122	0.0381326	0.87069
BS00022838_51	0.955328	0.988751	0.748184	0.0841423	0.0617621	0.00177305	0.0396901	0.0415027	0.936508
RAC875_rep_c69785_196	0.859858	0.970208	0.787414	0.0674951	0.0617636	0.00496454	0.035425	0.0373082	0.726787
wsnp_Ex_rep_c66696_65023462	0.859858	0.970208	0.787414	0.0674951	0.0617636	0.00496454	0.035425	0.0373082	0.726787
AX-158523271	0.950069	0.988745	0.774586	0.0727532	0.0617843	0.00177305	0.0355099	0.0373383	0.952381
AX-158550632	0.637508	0.899072	0.721572	0.0964656	0.0618767	0.0131206	0.0361955	0.0381406	0.5402
AX-158584905	0.637508	0.899072	0.721572	0.0964656	0.0618767	0.0131206	0.0361955	0.0381406	0.5402
RAC875_c23340_2243	0.637508	0.899072	0.721572	0.0964656	0.0618767	0.0131206	0.0361955	0.0381406	0.5402
AX-109900018	0.923966	0.981438	0.755868	0.0807456	0.0618886	0.00265957	0.0349789	0.0369276	0.881481
AX-86165910	0.710072	0.927027	0.748307	0.0840876	0.0618911	0.0106974	0.0368968	0.0390355	0.563852
Kukri_rep_c72702_220	0.710072	0.927027	0.748307	0.0840876	0.0618911	0.0106974	0.0368968	0.0390355	0.563852
Tdurum_contig13930_254	0.770113	0.922237	0.661734	0.127795	0.0620951	0.00851064	0.0370209	0.0389609	0.597398
BS00022836_51	0.95208	0.983274	0.650951	0.134054	0.0621107	0.00177305	0.0370003	0.0389467	0.869565
wsnp_JD_rep_c50820_34666611	0.862509	0.953928	0.664905	0.125994	0.0622084	0.00496454	0.0361082	0.0379502	0.726787
AX-158566530	0.844964	0.977209	0.852996	0.0430845	0.062271	0.00555556	0.0358341	0.037678	0.651468
Kukri_c30847_344	0.955435	0.986919	0.706472	0.103871	0.0622872	0.00177305	0.0397854	0.041673	0.936508
Tdurum_contig10362_328	0.955832	0.992839	0.837865	0.0483774	0.062316	0.00177305	0.0401434	0.0419826	0.936508
AX-158591222	0.892639	0.973877	0.756679	0.0803909	0.0623225	0.00413712	0.0385346	0.0407451	0.811371
BS00039559_51	0.892639	0.973877	0.756679	0.0803909	0.0623225	0.00413712	0.0385346	0.0407451	0.811371
BS00070643_51	0.892639	0.973877	0.756679	0.0803909	0.0623225	0.00413712	0.0385346	0.0407451	0.811371
AX-158570103	0.813498	0.96967	0.837375	0.0485522	0.0623752	0.0070922	0.0380275	0.0396743	0.602899
BobWhite_c16847_99	0.876071	0.97292	0.781491	0.0699015	0.0624091	0.00443262	0.0357673	0.0378077	0.765539
wsnp_BE489326B_Ta_2_2	0.876071	0.97292	0.781491	0.0699015	0.0624091	0.00443262	0.0357673	0.0378077	0.765539
Kukri_c31776_1621	0.444882	0.834233	0.701384	0.106438	0.0624988	0.0201537	0.0363052	0.0379183	0.275156
TA004132-0670	0.847448	0.973483	0.826174	0.0525996	0.0625949	0.00555556	0.0364175	0.0381109	0.651468
IACX5982	0.829233	0.956388	0.744614	0.0857445	0.0626023	0.00638298	0.0373783	0.0394358	0.749831
IACX3586	0.826048	0.938912	0.648822	0.135314	0.062616	0.00650118	0.0373733	0.0393653	0.72894
wsnp_JD_c6160_7327405	0.82395	0.966703	0.810866	0.0583124	0.0626635	0.00638298	0.0362566	0.0381794	0.722682
AX-109528142	0.952151	0.990394	0.799242	0.0627964	0.0626667	0.00177305	0.0370552	0.0388307	0.869565
wsnp_Ra_c4321_7860456	0.908568	0.972075	0.694582	0.109929	0.0627184	0.0035461	0.038784	0.0408749	0.79651
AX-109467010	0.952924	0.987906	0.74309	0.086433	0.0628131	0.00177305	0.0376633	0.0395316	0.869565
BS00035894_51	0.952924	0.987906	0.74309	0.086433	0.0628131	0.00177305	0.0376633	0.0395316	0.869565
AX-95080900	0.864121	0.973801	0.807189	0.059717	0.0628364	0.00496454	0.0365364	0.0385387	0.726787
wsnp_RFL_Contig2403_1927045	0.805906	0.935074	0.66549	0.125663	0.0628991	0.0070922	0.03654	0.0382625	0.647021
AX-158538945	0.952224	0.981327	0.609163	0.160399	0.0629274	0.00177305	0.0371117	0.0388963	0.869565
Kukri_c75754_239	0.952224	0.981327	0.609163	0.160399	0.0629274	0.00177305	0.0371117	0.0388963	0.869565
AX-108726686	0.736246	0.965004	0.867316	0.0382454	0.0629341	0.0101064	0.0383175	0.0404821	0.468033
AX-158533248	0.736246	0.965004	0.867316	0.0382454	0.0629341	0.0101064	0.0383175	0.0404821	0.468033
AX-158578042	0.92236	0.985987	0.819515	0.0550586	0.0629591	0.00283688	0.0365391	0.0382761	0.770115
AX-94451945	0.92236	0.985987	0.819515	0.0550586	0.0629591	0.00283688	0.0365391	0.0382761	0.770115
AX-158541575	0.953176	0.98441	0.667054	0.124782	0.0629809	0.00177305	0.0378659	0.0399276	0.869565
AX-158548580	0.953176	0.98441	0.667054	0.124782	0.0629809	0.00177305	0.0378659	0.0399276	0.869565
wsnp_Ex_c16569_25082760	0.953176	0.98441	0.667054	0.124782	0.0629809	0.00177305	0.0378659	0.0399276	0.869565
tplb0036j13_718	0.768084	0.929677	0.696775	0.108796	0.0631433	0.00868794	0.0374616	0.0393567	0.597343
AX-94686079	0.611311	0.896322	0.733263	0.0909419	0.0631677	0.0140071	0.0360368	0.0380644	0.515099
BS00011869_51	0.952511	0.986289	0.711283	0.101478	0.0632072	0.00177305	0.0373359	0.0393746	0.869565
RAC875_c89088_79	0.779203	0.922415	0.648615	0.135437	0.0632426	0.00827423	0.0374744	0.0394364	0.681321
AX-158566128	0.952981	0.989362	0.773754	0.0731003	0.0633752	0.00177305	0.0377091	0.0398589	0.952381
AX-108865765	0.954452	0.983773	0.643733	0.13836	0.0634058	0.00177305	0.0389273	0.0410009	0.945578
BS00107795_51	0.939202	0.986605	0.779684	0.0706428	0.0634288	0.00236407	0.038884	0.0413433	0.96044
wsnp_Ex_c25505_34771897	0.939202	0.986605	0.779684	0.0706428	0.0634288	0.00236407	0.038884	0.0413433	0.96044
AX-158592226	0.913936	0.986134	0.838889	0.0480132	0.0634599	0.00319149	0.0370828	0.0392673	0.769115
BobWhite_rep_c64944_264	0.953242	0.984543	0.669429	0.123453	0.0635311	0.00177305	0.0379194	0.0398075	0.869565
TGWA25K-TG0190	0.953242	0.984543	0.669429	0.123453	0.0635311	0.00177305	0.0379194	0.0398075	0.869565
Excalibur_c63243_434	0.909978	0.965257	0.614058	0.157128	0.0635832	0.0035461	0.0393916	0.041291	0.79651
Kukri_rep_c98227_390	0.83231	0.956949	0.743273	0.0863504	0.0635851	0.00644208	0.0384166	0.040498	0.702741
RAC875_c36670_72	0.955658	0.985615	0.675595	0.120044	0.0636172	0.00177305	0.0399856	0.0420628	0.850932
Tdurum_contig30677_55	0.955658	0.985615	0.675595	0.120044	0.0636172	0.00177305	0.0399856	0.0420628	0.850932
Tdurum_contig85266_280	0.955658	0.985615	0.675595	0.120044	0.0636172	0.00177305	0.0399856	0.0420628	0.850932
CAP11_c1989_183	0.792764	0.97144	0.862188	0.0399599	0.0637001	0.00744681	0.0359339	0.0376918	0.681093
AX-94559061	0.83903	0.966196	0.789997	0.0664569	0.0637517	0.00620567	0.0385516	0.0404155	0.688613
Ex_c6479_750	0.685822	0.945232	0.825677	0.0527817	0.0637711	0.0125887	0.0400685	0.0425423	0.594372
wsnp_Ex_c40019_47166796	0.685822	0.945232	0.825677	0.0527817	0.0637711	0.0125887	0.0400685	0.0425423	0.594372
AX-158584893	0.480338	0.808372	0.631245	0.146043	0.0637896	0.0187352	0.0360527	0.038008	0.390099
wsnp_JD_c10233_10936535	0.480338	0.808372	0.631245	0.146043	0.0637896	0.0187352	0.0360527	0.038008	0.390099
AX-158558042	0.953792	0.989074	0.763551	0.0774177	0.0638339	0.00177305	0.0383712	0.0406241	0.869565
RAC875_c18058_1070	0.953792	0.989074	0.763551	0.0774177	0.0638339	0.00177305	0.0383712	0.0406241	0.869565
Excalibur_c31044_482	0.955244	0.98259	0.610995	0.159168	0.0638957	0.00177305	0.0396163	0.0415515	0.850932
AX-158534063	0.956315	0.983379	0.619534	0.153529	0.0639075	0.00177305	0.0405872	0.0424571	0.850932
AX-158548260	0.953771	0.983786	0.649271	0.135047	0.0639691	0.00177305	0.0383536	0.0402496	0.869565
AX-158578056	0.953771	0.983786	0.649271	0.135047	0.0639691	0.00177305	0.0383536	0.0402496	0.869565
Ku_c13637_545	0.911067	0.983197	0.811055	0.0582403	0.0640196	0.00319149	0.0358866	0.0376575	0.792204
Kukri_rep_c103147_745	0.630204	0.896995	0.721455	0.096522	0.0640453	0.0137116	0.0370788	0.0391625	0.51597
AX-109854225	0.902376	0.974776	0.741623	0.0870987	0.0640857	0.00378251	0.0387457	0.0407121	0.836074
Excalibur_rep_c102327_102	0.902376	0.974776	0.741623	0.0870987	0.0640857	0.00378251	0.0387457	0.0407121	0.836074
IAAV3906	0.953356	0.988675	0.757215	0.0801571	0.0641141	0.00177305	0.038012	0.0400417	0.869565
JD_c32759_313	0.953356	0.988675	0.757215	0.0801571	0.0641141	0.00177305	0.038012	0.0400417	0.869565
Kukri_c57687_182	0.953356	0.988675	0.757215	0.0801571	0.0641141	0.00177305	0.038012	0.0400417	0.869565
wsnp_Ex_c10527_17198865	0.953356	0.988675	0.757215	0.0801571	0.0641141	0.00177305	0.038012	0.0400417	0.869565
wsnp_Ex_c1387_2659020	0.953356	0.988675	0.757215	0.0801571	0.0641141	0.00177305	0.038012	0.0400417	0.869565
wsnp_Ex_c14641_22698595	0.953356	0.988675	0.757215	0.0801571	0.0641141	0.00177305	0.038012	0.0400417	0.869565
wsnp_Ex_c27088_36309449	0.953356	0.988675	0.757215	0.0801571	0.0641141	0.00177305	0.038012	0.0400417	0.869565
wsnp_Ex_c3178_5868813	0.953356	0.988675	0.757215	0.0801571	0.0641141	0.00177305	0.038012	0.0400417	0.869565
wsnp_Ex_c4286_7734046	0.953356	0.988675	0.757215	0.0801571	0.0641141	0.00177305	0.038012	0.0400417	0.869565
wsnp_Ku_c46057_52907637	0.953356	0.988675	0.757215	0.0801571	0.0641141	0.00177305	0.038012	0.0400417	0.869565
wsnp_Ku_c7197_12439299	0.953356	0.988675	0.757215	0.0801571	0.0641141	0.00177305	0.038012	0.0400417	0.869565
BS00101401_51	0.928612	0.991944	0.887149	0.0318016	0.0641169	0.00265957	0.0372551	0.0388403	0.881481
AX-158577307	0.933032	0.980757	0.712657	0.1008	0.0641258	0.00265957	0.0397141	0.04199	0.941392
wsnp_Ex_c33765_42199371	0.933032	0.980757	0.712657	0.1008	0.0641258	0.00265957	0.0397141	0.04199	0.941392
AX-111565410	0.907369	0.982661	0.812818	0.0575721	0.0642451	0.0035461	0.0382819	0.0403376	0.821946
AX-158543643	0.912291	0.959848	0.542211	0.211075	0.064248	0.0035461	0.0404301	0.0424246	0.826956
AX-158566905	0.912291	0.959848	0.542211	0.211075	0.064248	0.0035461	0.0404301	0.0424246	0.826956
AX-95259896	0.912291	0.959848	0.542211	0.211075	0.064248	0.0035461	0.0404301	0.0424246	0.826956
Ku_c5725_892	0.528148	0.840391	0.66174	0.127792	0.0642869	0.0183806	0.0389542	0.0406921	0.314985
AX-95189509	0.473159	0.816373	0.651456	0.133756	0.064287	0.0187352	0.0355614	0.0373911	0.451089
BS00022072_51	0.813208	0.964166	0.808161	0.0593444	0.0642874	0.00673759	0.03607	0.0378466	0.829885
AX-109441689	0.955718	0.985867	0.680839	0.117194	0.0642884	0.00177305	0.0400399	0.0421854	0.850932
AX-111466791	0.833051	0.961748	0.770878	0.0743057	0.0643226	0.00620567	0.037171	0.0392724	0.723211
AX-158551104	0.833051	0.961748	0.770878	0.0743057	0.0643226	0.00620567	0.037171	0.0392724	0.723211
BobWhite_c19155_246	0.833051	0.961748	0.770878	0.0743057	0.0643226	0.00620567	0.037171	0.0392724	0.723211
BobWhite_c2715_411	0.833051	0.961748	0.770878	0.0743057	0.0643226	0.00620567	0.037171	0.0392724	0.723211
BS00066143_51	0.833051	0.961748	0.770878	0.0743057	0.0643226	0.00620567	0.037171	0.0392724	0.723211
Excalibur_c9846_1720	0.833051	0.961748	0.770878	0.0743057	0.0643226	0.00620567	0.037171	0.0392724	0.723211
Tdurum_contig59953_282	0.957655	0.980498	0.539449	0.213436	0.0644445	0.00177305	0.0418718	0.0437733	0.936508
AX-110981509	0.855459	0.97251	0.809816	0.0587123	0.0644562	0.00555556	0.0384357	0.0399905	0.651468
Tdurum_contig26542_457	0.855459	0.97251	0.809816	0.0587123	0.0644562	0.00555556	0.0384357	0.0399905	0.651468
AX-111564213	0.953944	0.985054	0.675474	0.120111	0.0645547	0.00177305	0.0384975	0.0407531	0.869565
AX-94789084	0.953944	0.985054	0.675474	0.120111	0.0645547	0.00177305	0.0384975	0.0407531	0.869565
RAC875_c9122_395	0.538841	0.870555	0.719305	0.0975578	0.0645815	0.0169622	0.0367816	0.0387111	0.506041
AX-110918031	0.709554	0.923345	0.736078	0.089638	0.0645858	0.0105792	0.036424	0.0385894	0.573037
AX-158574910	0.956383	0.987623	0.716241	0.0990445	0.0645999	0.00177305	0.0406505	0.0421857	0.850932
AX-94420575	0.803581	0.914183	0.563093	0.193976	0.0646	0.00786052	0.040019	0.0419149	0.801832
AX-158557831	0.8806	0.972712	0.771459	0.0740613	0.0646058	0.00443262	0.0371243	0.0391893	0.765539
AX-95200481	0.8806	0.972712	0.771459	0.0740613	0.0646058	0.00443262	0.0371243	0.0391893	0.765539
BobWhite_c16847_343	0.8806	0.972712	0.771459	0.0740613	0.0646058	0.00443262	0.0371243	0.0391893	0.765539
TA001218-0519	0.8806	0.972712	0.771459	0.0740613	0.0646058	0.00443262	0.0371243	0.0391893	0.765539
RFL_Contig5031_526	0.893889	0.970126	0.718469	0.0979623	0.0646609	0.00425532	0.0401023	0.041762	0.84127
AX-94438244	0.869708	0.969879	0.768821	0.0751731	0.0646883	0.00502364	0.0385567	0.0406967	0.832051
Excalibur_c5624_1026	0.915509	0.984901	0.821294	0.0543977	0.0646903	0.00319149	0.037773	0.0397218	0.769115
Kukri_c29142_1046	0.915509	0.984901	0.821294	0.0543977	0.0646903	0.00319149	0.037773	0.0397218	0.769115
Kukri_c29142_450	0.915509	0.984901	0.821294	0.0543977	0.0646903	0.00319149	0.037773	0.0397218	0.769115
Kukri_c29142_473	0.915509	0.984901	0.821294	0.0543977	0.0646903	0.00319149	0.037773	0.0397218	0.769115
Kukri_c29142_747	0.915509	0.984901	0.821294	0.0543977	0.0646903	0.00319149	0.037773	0.0397218	0.769115
Kukri_c34435_265	0.915509	0.984901	0.821294	0.0543977	0.0646903	0.00319149	0.037773	0.0397218	0.769115
Kukri_rep_c106490_583	0.915509	0.984901	0.821294	0.0543977	0.0646903	0.00319149	0.037773	0.0397218	0.769115
RAC875_c278_2934	0.915509	0.984901	0.821294	0.0543977	0.0646903	0.00319149	0.037773	0.0397218	0.769115
tplb0033c09_1345	0.915509	0.984901	0.821294	0.0543977	0.0646903	0.00319149	0.037773	0.0397218	0.769115
AX-158547366	0.894032	0.969854	0.715519	0.0993969	0.0647153	0.00425532	0.0401566	0.0418173	0.84127
Kukri_c53810_137	0.894032	0.969854	0.715519	0.0993969	0.0647153	0.00425532	0.0401566	0.0418173	0.84127
Kukri_c3866_1768	0.94154	0.987103	0.779385	0.0707658	0.0647685	0.00236407	0.040439	0.0428241	0.848739
Excalibur_rep_c105491_144	0.894139	0.961876	0.639867	0.140706	0.0647805	0.00413712	0.0390807	0.0411731	0.819565
BS00067590_51	0.909469	0.976853	0.744321	0.0858764	0.0648196	0.0035461	0.0391699	0.0413475	0.821946
Kukri_c32307_481	0.909469	0.976853	0.744321	0.0858764	0.0648196	0.0035461	0.0391699	0.0413475	0.821946
RAC875_c10650_90	0.909469	0.976853	0.744321	0.0858764	0.0648196	0.0035461	0.0391699	0.0413475	0.821946
RAC875_rep_c116755_285	0.909469	0.976853	0.744321	0.0858764	0.0648196	0.0035461	0.0391699	0.0413475	0.821946
IACX742	0.800776	0.976325	0.881166	0.033715	0.0648825	0.00744681	0.0373791	0.0392886	0.581613
Excalibur_c42110_210	0.876671	0.971603	0.769742	0.074784	0.0648825	0.00460993	0.0373791	0.0392886	0.688756
BS00089283_51	0.909698	0.974629	0.719039	0.0976865	0.0648944	0.0035461	0.0392695	0.0413923	0.821946
Tdurum_contig33628_129	0.909698	0.974629	0.719039	0.0976865	0.0648944	0.0035461	0.0392695	0.0413923	0.821946
AX-111639392	0.909698	0.968386	0.64991	0.134669	0.0648944	0.0035461	0.0392695	0.0413923	0.821946
AX-158536929	0.909698	0.968386	0.64991	0.134669	0.0648944	0.0035461	0.0392695	0.0413923	0.821946
BS00022541_51	0.909698	0.968386	0.64991	0.134669	0.0648944	0.0035461	0.0392695	0.0413923	0.821946
wsnp_Ku_c6065_10682531	0.909698	0.968386	0.64991	0.134669	0.0648944	0.0035461	0.0392695	0.0413923	0.821946
RFL_Contig5637_1008	0.893454	0.970138	0.719727	0.097354	0.0649204	0.00443262	0.041603	0.0433899	0.809373
AX-109392359	0.624325	0.895315	0.721342	0.096576	0.0649375	0.0140071	0.0372852	0.0393354	0.515099
AX-95116218	0.786321	0.921421	0.632257	0.145409	0.0650124	0.00827423	0.0387227	0.0407075	0.681321
AX-89607200	0.878054	0.986824	0.891952	0.0302841	0.0650733	0.00443262	0.036349	0.0379607	0.788986
AX-94866977	0.741719	0.942335	0.776737	0.0718593	0.0650803	0.0102837	0.0398159	0.0417867	0.549779
Excalibur_c7706_1936	0.776451	0.908667	0.591442	0.172696	0.0651347	0.00886525	0.0396569	0.0414096	0.655797
TA004649-0518	0.776451	0.908667	0.591442	0.172696	0.0651347	0.00886525	0.0396569	0.0414096	0.655797
RAC875_c46516_443	0.857191	0.96734	0.771303	0.0741266	0.0652189	0.00555556	0.0389021	0.041061	0.651468
Kukri_c56203_965	0.91992	0.954975	0.437748	0.321104	0.0652226	0.00319149	0.0398537	0.0417192	0.740255
AX-94516388	0.957239	0.983333	0.610222	0.159687	0.0652339	0.00177305	0.0414637	0.043281	0.850932
BobWhite_c13210_115	0.888012	0.967828	0.712721	0.100768	0.0652695	0.00443262	0.0395814	0.0416722	0.818283
AX-94398361	0.890118	0.981441	0.831101	0.0508056	0.0653373	0.00425532	0.0387264	0.0407721	0.861111
Kukri_rep_c71670_163	0.920667	0.98208	0.774112	0.0729508	0.0653863	0.00319149	0.040229	0.0420386	0.740255
wsnp_JD_c16245_15468917	0.954748	0.986712	0.706359	0.103928	0.0654071	0.00177305	0.0391817	0.0412614	0.869565
AX-94895395	0.515138	0.89375	0.780866	0.0701574	0.0654185	0.0178487	0.0368119	0.0386662	0.42018
AX-95175890	0.515138	0.89375	0.780866	0.0701574	0.0654185	0.0178487	0.0368119	0.0386662	0.42018
RAC875_c11652_544	0.722546	0.948353	0.813853	0.0571808	0.0654195	0.010461	0.0377035	0.0396513	0.599755
wsnp_BE489326B_Ta_2_1	0.842453	0.964507	0.774714	0.0726999	0.0655186	0.00585106	0.0371385	0.0392262	0.685537
RAC875_c8714_1139	0.831822	0.950835	0.707659	0.103278	0.0655543	0.00620567	0.0368994	0.0389184	0.75089
wsnp_Ex_c24474_33721784	0.764246	0.956091	0.813752	0.0572188	0.0655554	0.00886525	0.0376037	0.0395623	0.577645
Tdurum_contig8158_269	0.889375	0.969508	0.724371	0.0951271	0.0656445	0.00443262	0.0400688	0.0419617	0.736232
BobWhite_c4014_508	0.867467	0.977514	0.830335	0.0510832	0.0656618	0.00502364	0.0379048	0.0398852	0.763834
IAAV3903	0.784047	0.942662	0.73449	0.0903721	0.0656787	0.00851064	0.0394096	0.0416406	0.72069
Excalibur_c11947_746	0.594127	0.860005	0.655078	0.131634	0.0656821	0.0150118	0.0369865	0.0388541	0.527323
BobWhite_s65298_124	0.746872	0.934093	0.739628	0.0880076	0.0656956	0.00963357	0.038058	0.0397324	0.476207
AX-94432058	0.505239	0.844361	0.685425	0.114737	0.0657629	0.0203901	0.041212	0.0432882	0.564626
AX-95173841	0.822736	0.963769	0.79561	0.0642242	0.0657809	0.00679669	0.0383422	0.0401361	0.721095
AX-109838796	0.955063	0.986835	0.707026	0.103594	0.0657981	0.00177305	0.0394567	0.0416621	0.869565
Kukri_rep_c108929_91	0.955063	0.986835	0.707026	0.103594	0.0657981	0.00177305	0.0394567	0.0416621	0.869565
wsnp_Ex_c5074_9009245	0.955063	0.986835	0.707026	0.103594	0.0657981	0.00177305	0.0394567	0.0416621	0.869565
AX-158596100	0.694959	0.953633	0.847996	0.0448126	0.0658775	0.0121158	0.0397187	0.0417761	0.592436
Excalibur_c20439_825	0.694959	0.953633	0.847996	0.0448126	0.0658775	0.0121158	0.0397187	0.0417761	0.592436
AX-158566169	0.964602	0.990221	0.723748	0.0954241	0.0658937	0.00141844	0.0400709	0.0425388	0.87069
BS00040165_51	0.964602	0.990221	0.723748	0.0954241	0.0658937	0.00141844	0.0400709	0.0425388	0.87069
BS00040166_51	0.964602	0.990221	0.723748	0.0954241	0.0658937	0.00141844	0.0400709	0.0425388	0.87069
RAC875_c83401_115	0.955291	0.984815	0.660368	0.128577	0.0659891	0.00177305	0.0396576	0.0416301	0.869565
wsnp_Ex_c1996_3754394	0.957954	0.982104	0.574384	0.185249	0.0662318	0.00177305	0.0421691	0.0439682	0.850932
AX-158551014	0.593124	0.937252	0.845781	0.0455849	0.0662367	0.0163712	0.0402362	0.0423539	0.427963
Kukri_c36879_83	0.790852	0.939432	0.710406	0.101912	0.066262	0.00851064	0.0406919	0.0427104	0.597398
BS00082268_51	0.688296	0.953181	0.849798	0.0441875	0.0662665	0.0117612	0.037732	0.0396838	0.617336
BobWhite_c10832_1131	0.931996	0.975906	0.645696	0.137179	0.0663222	0.00283688	0.0417162	0.0436844	0.917582
Ra_c26319_331	0.921175	0.984942	0.808969	0.0590353	0.0663264	0.00319149	0.0404883	0.0426643	0.740255
wsnp_Ex_c40732_47728890	0.921175	0.984942	0.808969	0.0590353	0.0663264	0.00319149	0.0404883	0.0426643	0.740255
AX-158537263	0.915487	0.959354	0.519052	0.231647	0.0663904	0.0035461	0.0419593	0.0438039	0.814841
Ra_c104959_422	0.915487	0.959354	0.519052	0.231647	0.0663904	0.0035461	0.0419593	0.0438039	0.814841
IACX8602	0.910655	0.978762	0.76229	0.0779591	0.0663938	0.0035461	0.0396902	0.0416594	0.821946
D_contig03023_692	0.476431	0.893819	0.797199	0.0635981	0.0664525	0.0201537	0.0384928	0.0403639	0.34877
BS00065053_51	0.956248	0.98397	0.633607	0.144566	0.0664644	0.00177305	0.0405254	0.0427028	0.869565
RAC875_rep_c106400_276	0.956248	0.98397	0.633607	0.144566	0.0664644	0.00177305	0.0405254	0.0427028	0.869565
wsnp_Ku_c8765_14824678	0.956248	0.98397	0.633607	0.144566	0.0664644	0.00177305	0.0405254	0.0427028	0.869565
BS00089031_51	0.820699	0.974538	0.857991	0.0413783	0.0664666	0.0070922	0.0395548	0.041485	0.647021
AX-89462272	0.95631	0.987964	0.724508	0.0950617	0.066523	0.00177305	0.0405829	0.0425665	0.869565
AX-158589588	0.860209	0.975902	0.827614	0.0520731	0.0665431	0.00555556	0.039742	0.041657	0.651468
TA002501-1291	0.519114	0.871374	0.732523	0.0912862	0.0665953	0.0178487	0.0371163	0.0391309	0.51966
AX-94384331	0.913205	0.977977	0.746261	0.0850032	0.0666027	0.0035461	0.0408561	0.0429016	0.73913
Excalibur_c41490_397	0.847982	0.95607	0.711021	0.101607	0.0666365	0.00602837	0.0396557	0.0412592	0.710326
RAC875_rep_c69917_755	0.419239	0.848212	0.73864	0.0884599	0.0666408	0.0222813	0.0383658	0.0406067	0.431966
AX-158591523	0.934301	0.983115	0.742994	0.0864765	0.0666416	0.00265957	0.0404812	0.043021	0.866667
BS00041707_51	0.955846	0.988961	0.749982	0.0833415	0.0666586	0.00177305	0.0401563	0.042137	0.869565
Tdurum_contig13431_127	0.815254	0.965589	0.813738	0.0572243	0.0666741	0.00732861	0.0396685	0.0419836	0.696018
AX-158543348	0.895182	0.965859	0.67428	0.120766	0.0667081	0.00407801	0.0389055	0.0407921	0.766539
AX-94815412	0.712506	0.903918	0.665796	0.12549	0.0667307	0.0119385	0.0415262	0.0437846	0.592336
AX-94854329	0.710524	0.913822	0.702297	0.105975	0.0667976	0.0116093	0.0401043	0.0423869	0.627331
wsnp_Ex_c25132_34396655	0.815225	0.971816	0.847468	0.0449964	0.0667987	0.00744681	0.040302	0.0422965	0.634119
AX-158553876	0.79156	0.978859	0.898575	0.0282183	0.0668331	0.00815603	0.0391289	0.0409822	0.657346
AX-94730618	0.592127	0.88071	0.707532	0.103341	0.066851	0.0157801	0.0386888	0.0408001	0.47277
AX-158555754	0.955353	0.990574	0.788885	0.0669029	0.066863	0.00177305	0.0397123	0.0418435	0.884058
AX-111459937	0.828293	0.961712	0.777014	0.0717447	0.0668703	0.006974	0.0406157	0.0427963	0.701021
Excalibur_c45861_189	0.828293	0.961712	0.777014	0.0717447	0.0668703	0.006974	0.0406157	0.0427963	0.701021
wsnp_Ra_c3766_6947263	0.908442	0.976292	0.741063	0.0873531	0.0669529	0.0035461	0.0387308	0.0406754	0.84173
AX-158599772	0.869604	0.970615	0.774652	0.0727257	0.0669748	0.00496454	0.0380727	0.0400472	0.754109
AX-94431524	0.931433	0.984811	0.77848	0.0711388	0.0670267	0.00265957	0.0387878	0.0412119	0.881481
Tdurum_contig50984_599	0.517393	0.799985	0.585553	0.176946	0.0670282	0.0187352	0.0388208	0.0408264	0.390099
Excalibur_c80041_400	0.956208	0.986706	0.696438	0.108969	0.0670556	0.00177305	0.040488	0.0427121	0.869565
CAP7_c4800_276	0.912038	0.973206	0.695396	0.109507	0.0670881	0.0035461	0.040314	0.0423825	0.821946
RAC875_c64253_666	0.912038	0.973206	0.695396	0.109507	0.0670881	0.0035461	0.040314	0.0423825	0.821946
BS00065292_51	0.956019	0.983029	0.61412	0.157087	0.0670881	0.00177305	0.040314	0.0424905	0.869565
Ra_c956_2318	0.912715	0.974392	0.70662	0.103797	0.067091	0.0035461	0.0406265	0.0427739	0.821946
AX-110469146	0.912715	0.968004	0.633435	0.144674	0.067091	0.0035461	0.0406265	0.0427739	0.821946
AX-158526169	0.912715	0.968004	0.633435	0.144674	0.067091	0.0035461	0.0406265	0.0427739	0.821946
AX-158565544	0.912715	0.968004	0.633435	0.144674	0.067091	0.0035461	0.0406265	0.0427739	0.821946
AX-158565602	0.912715	0.968004	0.633435	0.144674	0.067091	0.0035461	0.0406265	0.0427739	0.821946
AX-158585760	0.912715	0.968004	0.633435	0.144674	0.067091	0.0035461	0.0406265	0.0427739	0.821946
AX-94478919	0.912715	0.968004	0.633435	0.144674	0.067091	0.0035461	0.0406265	0.0427739	0.821946
AX-95153681	0.912715	0.968004	0.633435	0.144674	0.067091	0.0035461	0.0406265	0.0427739	0.821946
BS00022520_51	0.912715	0.968004	0.633435	0.144674	0.067091	0.0035461	0.0406265	0.0427739	0.821946
Excalibur_c79041_63	0.912715	0.968004	0.633435	0.144674	0.067091	0.0035461	0.0406265	0.0427739	0.821946
GENE-0209_733	0.912715	0.968004	0.633435	0.144674	0.067091	0.0035461	0.0406265	0.0427739	0.821946
IAAV5683	0.912715	0.968004	0.633435	0.144674	0.067091	0.0035461	0.0406265	0.0427739	0.821946
IACX3059	0.912715	0.968004	0.633435	0.144674	0.067091	0.0035461	0.0406265	0.0427739	0.821946
Jagger_c3991_101	0.912715	0.968004	0.633435	0.144674	0.067091	0.0035461	0.0406265	0.0427739	0.821946
Ra_c10633_2155	0.912715	0.968004	0.633435	0.144674	0.067091	0.0035461	0.0406265	0.0427739	0.821946
TA002629-0202	0.912715	0.968004	0.633435	0.144674	0.067091	0.0035461	0.0406265	0.0427739	0.821946
wsnp_Ex_c18654_27528399	0.912715	0.968004	0.633435	0.144674	0.067091	0.0035461	0.0406265	0.0427739	0.821946
wsnp_Ex_rep_c70120_69070056	0.912715	0.968004	0.633435	0.144674	0.067091	0.0035461	0.0406265	0.0427739	0.821946
Excalibur_s107771_77	0.616296	0.890557	0.714772	0.0997617	0.067129	0.0146572	0.0381993	0.0403802	0.462676
BobWhite_c5396_296	0.956912	0.987269	0.704529	0.104847	0.0671586	0.00177305	0.0411493	0.0434259	0.869565
AX-94416605	0.956708	0.980609	0.552088	0.202826	0.067179	0.00177305	0.0409553	0.0432342	0.869565
AX-108862241	0.773908	0.973872	0.884437	0.0326658	0.0671964	0.00886525	0.0392108	0.041302	0.577645
AX-111059525	0.773908	0.973872	0.884437	0.0326658	0.0671964	0.00886525	0.0392108	0.041302	0.577645
AX-94492007	0.773908	0.973872	0.884437	0.0326658	0.0671964	0.00886525	0.0392108	0.041302	0.577645
BobWhite_c12428_371	0.773908	0.973872	0.884437	0.0326658	0.0671964	0.00886525	0.0392108	0.041302	0.577645
BS00041742_51	0.773908	0.973872	0.884437	0.0326658	0.0671964	0.00886525	0.0392108	0.041302	0.577645
AX-110487164	0.958718	0.990234	0.763433	0.0774683	0.0672095	0.00177305	0.0429492	0.0450081	0.850932
AX-158557731	0.958718	0.990234	0.763433	0.0774683	0.0672095	0.00177305	0.0429492	0.0450081	0.850932
AX-89740997	0.958718	0.990234	0.763433	0.0774683	0.0672095	0.00177305	0.0429492	0.0450081	0.850932
BS00084159_51	0.958718	0.990234	0.763433	0.0774683	0.0672095	0.00177305	0.0429492	0.0450081	0.850932
Kukri_c63259_151	0.958718	0.990234	0.763433	0.0774683	0.0672095	0.00177305	0.0429492	0.0450081	0.850932
BS00063686_51	0.485855	0.893145	0.792169	0.0655892	0.0672171	0.0201537	0.0391984	0.0410823	0.34877
wsnp_Ex_c4125_7456528	0.965774	0.990004	0.70794	0.103137	0.0672587	0.00141844	0.0414435	0.0435952	0.87069
AX-158572606	0.780145	0.961189	0.823471	0.053593	0.0673545	0.00927896	0.0422049	0.0442447	0.798974
Kukri_c17417_291	0.909842	0.978432	0.760776	0.0786119	0.0673647	0.0035461	0.0393319	0.0415774	0.84173
AX-95022227	0.956304	0.992956	0.838805	0.048043	0.0674265	0.00177305	0.040577	0.0424277	0.869565
AX-158562253	0.744671	0.94904	0.800414	0.0623384	0.0674663	0.00963357	0.03773	0.0395035	0.523824
BS00088489_51	0.744671	0.94904	0.800414	0.0623384	0.0674663	0.00963357	0.03773	0.0395035	0.523824
BS00105315_51	0.744671	0.94904	0.800414	0.0623384	0.0674663	0.00963357	0.03773	0.0395035	0.523824
Ex_c24711_1153	0.744671	0.94904	0.800414	0.0623384	0.0674663	0.00963357	0.03773	0.0395035	0.523824
GENE-1125_32	0.744671	0.94904	0.800414	0.0623384	0.0674663	0.00963357	0.03773	0.0395035	0.523824
Tdurum_contig54925_202	0.744671	0.94904	0.800414	0.0623384	0.0674663	0.00963357	0.03773	0.0395035	0.523824
Tdurum_contig54925_415	0.744671	0.94904	0.800414	0.0623384	0.0674663	0.00963357	0.03773	0.0395035	0.523824
Ra_c11464_294	0.918061	0.964773	0.570082	0.188533	0.0675335	0.0035461	0.0432772	0.0451245	0.814841
RAC875_c12348_720	0.863744	0.960571	0.710627	0.101802	0.0675882	0.00567376	0.0416404	0.0436258	0.731801
TGWA25K-TG0203	0.863744	0.960571	0.710627	0.101802	0.0675882	0.00567376	0.0416404	0.0436258	0.731801
AX-108806404	0.863283	0.979549	0.850416	0.0439738	0.0675894	0.00549645	0.0402031	0.0424512	0.651596
AX-158558376	0.863283	0.979549	0.850416	0.0439738	0.0675894	0.00549645	0.0402031	0.0424512	0.651596
AX-158591367	0.803156	0.961625	0.80505	0.0605397	0.0676832	0.00821513	0.0417342	0.0441139	0.654357
AX-94451125	0.803156	0.961625	0.80505	0.0605397	0.0676832	0.00821513	0.0417342	0.0441139	0.654357
BS00020112_51	0.803156	0.961625	0.80505	0.0605397	0.0676832	0.00821513	0.0417342	0.0441139	0.654357
wsnp_Ku_c35386_44598937	0.516885	0.842732	0.674471	0.120661	0.0677546	0.0196217	0.0406151	0.042787	0.411692
AX-111501667	0.957476	0.987342	0.702321	0.105962	0.0677821	0.00177305	0.0416956	0.0441702	0.869565
AX-158542656	0.914035	0.974577	0.70426	0.104983	0.0677853	0.0035461	0.0412503	0.043497	0.821946
AX-158585029	0.914035	0.974577	0.70426	0.104983	0.0677853	0.0035461	0.0412503	0.043497	0.821946
wsnp_Ex_rep_c69647_68598463	0.914035	0.974577	0.70426	0.104983	0.0677853	0.0035461	0.0412503	0.043497	0.821946
BS00088755_51	0.526008	0.797014	0.571752	0.187253	0.0677928	0.0187352	0.0395264	0.0415449	0.390099
Tdurum_contig62557_263	0.526008	0.797014	0.571752	0.187253	0.0677928	0.0187352	0.0395264	0.0415449	0.390099
AX-158532916	0.95813	0.98315	0.597554	0.168372	0.0679144	0.00177305	0.0423467	0.0444825	0.945578
TA005332-1378	0.877543	0.967842	0.737394	0.0890316	0.067929	0.00496454	0.0405411	0.042766	0.726787
AX-158525891	0.890174	0.983418	0.84902	0.0444572	0.0679484	0.00443262	0.0403605	0.042418	0.765539
BS00022886_51	0.890174	0.983418	0.84902	0.0444572	0.0679484	0.00443262	0.0403605	0.042418	0.765539
wsnp_Ra_c10203_16850924	0.712328	0.916609	0.710116	0.102055	0.0679796	0.0113475	0.0394461	0.0416404	0.633617
Tdurum_contig9071_215	0.918613	0.961672	0.529059	0.222537	0.0681297	0.0035461	0.043571	0.0455463	0.79651
AX-158547221	0.83926	0.954841	0.719055	0.0976787	0.0681323	0.00691489	0.043019	0.0454115	0.799711
BS00110128_51	0.881324	0.971819	0.76254	0.0778516	0.0681607	0.00460993	0.0388446	0.0407807	0.717051
wsnp_Ex_rep_c102216_87433489	0.481779	0.888234	0.784327	0.0687447	0.0681675	0.0196217	0.0378637	0.0398485	0.547817
AX-158525902	0.887255	0.985183	0.868578	0.0378268	0.0681881	0.00443262	0.0393157	0.0415799	0.788986
Kukri_c87328_116	0.887255	0.985183	0.868578	0.0378268	0.0681881	0.00443262	0.0393157	0.0415799	0.788986
AX-158584922	0.546674	0.939627	0.866823	0.0384096	0.0682116	0.0175532	0.0387209	0.0407394	0.427651
BS00032146_51	0.546674	0.939627	0.866823	0.0384096	0.0682116	0.0175532	0.0387209	0.0407394	0.427651
wsnp_Ex_c20529_29609310	0.513128	0.858665	0.709708	0.102257	0.0682667	0.0187352	0.0384808	0.0404842	0.451089
wsnp_Ex_c52405_56014689	0.513128	0.858665	0.709708	0.102257	0.0682667	0.0187352	0.0384808	0.0404842	0.451089
BS00110489_51	0.81892	0.978291	0.880114	0.0340543	0.0682851	0.00679669	0.0375341	0.039422	0.711912
Ku_c69113_923	0.81892	0.978291	0.880114	0.0340543	0.0682851	0.00679669	0.0375341	0.039422	0.711912
AX-109353677	0.957116	0.982806	0.599056	0.167323	0.0683456	0.00177305	0.0413453	0.0435405	0.869565
AX-110387060	0.777308	0.961241	0.825953	0.0526808	0.0683577	0.00886525	0.0398095	0.0417292	0.577645
AX-111686258	0.51816	0.866577	0.723098	0.0957347	0.068393	0.0187352	0.0388827	0.0411328	0.451089
RAC875_rep_c92223_1022	0.817506	0.964565	0.805831	0.0602387	0.0684219	0.00738771	0.0404819	0.0424127	0.756481
AX-95207913	0.901512	0.970234	0.697769	0.108285	0.0684378	0.00425532	0.0432063	0.0453174	0.84127
AX-109864951	0.95915	0.990604	0.769991	0.0746791	0.0684545	0.00177305	0.0434044	0.0454342	0.945578
AX-158538914	0.381344	0.833042	0.730127	0.092406	0.0685275	0.0231678	0.0374487	0.0394855	0.369388
Tdurum_contig64587_107	0.957968	0.986995	0.690586	0.112011	0.068566	0.00177305	0.0421838	0.0443655	0.869565
wsnp_JD_c30_49073	0.959122	0.980612	0.525715	0.225543	0.0686125	0.00177305	0.043374	0.0454003	0.945578
AX-158621636	0.957666	0.983773	0.616687	0.155392	0.068661	0.00177305	0.0418824	0.0440844	0.869565
AX-110382419	0.910018	0.975178	0.724141	0.0952366	0.0686634	0.00378251	0.0420364	0.0444219	0.836074
Ku_c46571_2627	0.910018	0.975178	0.724141	0.0952366	0.0686634	0.00378251	0.0420364	0.0444219	0.836074
wsnp_JD_c29407_23413291	0.910018	0.975178	0.724141	0.0952366	0.0686634	0.00378251	0.0420364	0.0444219	0.836074
AX-158548656	0.940495	0.987796	0.794906	0.0645026	0.0686705	0.00236407	0.0397288	0.0419965	0.882353
Kukri_c3338_271	0.708932	0.973668	0.909534	0.0248662	0.0686909	0.0111702	0.0383766	0.0404076	0.579859
AX-158544034	0.7094	0.89731	0.646627	0.136622	0.0687011	0.012234	0.0420992	0.0441941	0.584921
AX-95238524	0.917315	0.964231	0.567404	0.190603	0.0687053	0.0035461	0.0428869	0.0448027	0.847343
CAP8_c710_140	0.917315	0.964231	0.567404	0.190603	0.0687053	0.0035461	0.0428869	0.0448027	0.847343
RAC875_c63420_397	0.917315	0.964231	0.567404	0.190603	0.0687053	0.0035461	0.0428869	0.0448027	0.847343
Tdurum_contig82236_117	0.917315	0.964231	0.567404	0.190603	0.0687053	0.0035461	0.0428869	0.0448027	0.847343
AX-108789882	0.92474	0.979741	0.730808	0.0920873	0.0687498	0.00319149	0.0424063	0.0443339	0.823071
AX-158577209	0.92474	0.979741	0.730808	0.0920873	0.0687498	0.00319149	0.0424063	0.0443339	0.823071
RAC875_c25124_182	0.778324	0.956595	0.804195	0.0608698	0.0688064	0.00886525	0.0399919	0.0419939	0.577645
tplb0028p02_562	0.596773	0.889504	0.72597	0.0943667	0.0688438	0.016253	0.0403072	0.0423308	0.358478
wsnp_Ex_rep_c66358_64543089	0.915317	0.967612	0.61754	0.154832	0.0688608	0.0035461	0.0418748	0.044045	0.821946
AX-158550203	0.894736	0.957464	0.595915	0.169523	0.06887	0.00443262	0.0421096	0.0442111	0.736232
Kukri_rep_c85536_598	0.578565	0.777452	0.471928	0.279742	0.0688779	0.0178487	0.0423522	0.0443278	0.424972
AX-158558671	0.506583	0.835775	0.667167	0.124719	0.068921	0.0203816	0.0413071	0.0434916	0.372558
wsnp_Ku_c15214_23756800	0.959023	0.98293	0.583434	0.178497	0.0689858	0.00177305	0.0432694	0.045422	0.945578
BobWhite_c42716_71	0.859434	0.962254	0.731472	0.0917767	0.0690805	0.00555556	0.0395228	0.0414235	0.686322
BS00110231_51	0.859434	0.962254	0.731472	0.0917767	0.0690805	0.00555556	0.0395228	0.0414235	0.686322
Excalibur_c40808_441	0.859434	0.962254	0.731472	0.0917767	0.0690805	0.00555556	0.0395228	0.0414235	0.686322
Excalibur_rep_c72368_68	0.859434	0.962254	0.731472	0.0917767	0.0690805	0.00555556	0.0395228	0.0414235	0.686322
RAC875_c47427_75	0.859434	0.962254	0.731472	0.0917767	0.0690805	0.00555556	0.0395228	0.0414235	0.686322
RFL_Contig5937_1677	0.859434	0.962254	0.731472	0.0917767	0.0690805	0.00555556	0.0395228	0.0414235	0.686322
wsnp_Ex_rep_c66255_64400455	0.859434	0.962254	0.731472	0.0917767	0.0690805	0.00555556	0.0395228	0.0414235	0.686322
IACX9183	0.936558	0.975943	0.620806	0.152702	0.0691311	0.00265957	0.0419215	0.0439161	0.866667
AX-94717890	0.84746	0.969849	0.802341	0.0615883	0.0691497	0.00620567	0.0406822	0.0427328	0.723211
CAP8_rep_c8022_270	0.84746	0.969849	0.802341	0.0615883	0.0691497	0.00620567	0.0406822	0.0427328	0.723211
IACX3415	0.829972	0.949339	0.702041	0.106104	0.0692286	0.0072695	0.0427548	0.0449141	0.703891
AX-94437143	0.896785	0.968294	0.692817	0.110846	0.0693459	0.00443262	0.0429455	0.044958	0.736232
AX-158556865	0.958482	0.985651	0.654391	0.132035	0.0693525	0.00177305	0.0427055	0.044749	0.869565
wsnp_Ex_c6278_10941843	0.917019	0.983605	0.802423	0.0615562	0.0693662	0.00319149	0.0384605	0.0403627	0.811094
wsnp_Ra_c6474_11298858	0.917019	0.983605	0.802423	0.0615562	0.0693662	0.00319149	0.0384605	0.0403627	0.811094
Kukri_c5967_586	0.693179	0.886381	0.62969	0.147021	0.0693798	0.0131206	0.042763	0.0448275	0.5402
BobWhite_c31163_694	0.868323	0.958527	0.685036	0.114945	0.0694144	0.00555556	0.0421909	0.0440616	0.651468
Tdurum_contig82404_354	0.868323	0.958527	0.685036	0.114945	0.0694144	0.00555556	0.0421909	0.0440616	0.651468
Kukri_c60564_136	0.752325	0.968952	0.87464	0.0358318	0.0694476	0.00981087	0.0396119	0.0416526	0.523391
AX-94943216	0.887807	0.973788	0.766369	0.0762137	0.0694787	0.00443262	0.039509	0.0418061	0.788986
Tdurum_contig54860_1393	0.846268	0.95253	0.691215	0.111682	0.0694841	0.00644208	0.0419046	0.0439587	0.648892
wsnp_Ex_c51461_55394646	0.958918	0.983704	0.603324	0.164371	0.0695	0.00177305	0.0431589	0.0452882	0.869565
AX-111545468	0.91656	0.974339	0.692462	0.111031	0.0695551	0.0035461	0.0424987	0.0447681	0.821946
AX-95091496	0.91656	0.974339	0.692462	0.111031	0.0695551	0.0035461	0.0424987	0.0447681	0.821946
BS00010179_51	0.91656	0.974339	0.692462	0.111031	0.0695551	0.0035461	0.0424987	0.0447681	0.821946
AX-158592638	0.923234	0.978099	0.714699	0.0997976	0.0695939	0.00319149	0.0415742	0.0436792	0.769115
AX-94674756	0.923234	0.978099	0.714699	0.0997976	0.0695939	0.00319149	0.0415742	0.0436792	0.769115
AX-111596716	0.724395	0.952809	0.828773	0.0516506	0.0696119	0.011052	0.0401009	0.0418602	0.622968
BS00066944_51	0.724395	0.952809	0.828773	0.0516506	0.0696119	0.011052	0.0401009	0.0418602	0.622968
TA005251-0278	0.724395	0.952809	0.828773	0.0516506	0.0696119	0.011052	0.0401009	0.0418602	0.622968
AX-111109389	0.89416	0.983289	0.842107	0.0468742	0.0696227	0.00443262	0.0418802	0.0439654	0.765539
Tdurum_contig53038_684	0.673404	0.942202	0.823031	0.0537554	0.0696848	0.0131206	0.0401737	0.0420552	0.565061
Tdurum_contig53038_714	0.673404	0.942202	0.823031	0.0537554	0.0696848	0.0131206	0.0401737	0.0420552	0.565061
BS00063160_51	0.95842	0.983639	0.606506	0.162197	0.0696861	0.00177305	0.0426422	0.0447908	0.869565
TA004050-0253	0.95842	0.983639	0.606506	0.162197	0.0696861	0.00177305	0.0426422	0.0447908	0.869565
wsnp_CAP7_c1592_791887	0.888449	0.980442	0.824668	0.0531523	0.0696876	0.00443262	0.0397363	0.041847	0.788986
Tdurum_contig12459_405	0.810152	0.954899	0.762438	0.0778953	0.0697487	0.00786052	0.0414043	0.0432015	0.580554
Tdurum_contig10108_246	0.913914	0.974339	0.701913	0.10617	0.0697948	0.0035461	0.0411926	0.0431989	0.84173
AX-158577230	0.566757	0.877725	0.717769	0.0983014	0.0698311	0.0173168	0.0399701	0.0422578	0.504507
AX-111556733	0.923508	0.984901	0.802606	0.0614855	0.0698343	0.00319149	0.0417231	0.0441472	0.769115
Excalibur_c878_1249	0.851072	0.974509	0.828835	0.0516283	0.0698553	0.00620567	0.0416689	0.0435699	0.723211
Excalibur_rep_c77221_93	0.95978	0.982705	0.569992	0.188603	0.0698955	0.00177305	0.0440836	0.0462509	0.945578
AX-158600354	0.899805	0.980717	0.807548	0.059579	0.0699108	0.00407801	0.0407006	0.0427206	0.789885
AX-158560555	0.861245	0.977845	0.840332	0.0475013	0.0699232	0.00567376	0.0408906	0.0428209	0.685961
AX-94428309	0.861245	0.977845	0.840332	0.0475013	0.0699232	0.00567376	0.0408906	0.0428209	0.685961
BS00063296_51	0.621371	0.825976	0.540385	0.212633	0.069938	0.016253	0.0429258	0.0449144	0.487182
AX-158626812	0.865429	0.97773	0.834508	0.0495778	0.0699956	0.00549645	0.0408443	0.0429648	0.686437
RFL_Contig6075_618	0.56485	0.850047	0.655398	0.131447	0.0700641	0.0177896	0.0408815	0.0428669	0.354258
wsnp_BE443187B_Ta_2_1	0.838176	0.962476	0.768119	0.0754706	0.0700843	0.00638298	0.0394439	0.0414657	0.682419
AX-158542947	0.958897	0.990369	0.765697	0.0764998	0.0701295	0.00177305	0.0431368	0.0451871	0.869565
GENE-0644_421	0.726519	0.859048	0.484601	0.265889	0.0701374	0.0118203	0.0432217	0.0451588	0.586083
AX-94684421	0.967194	0.98995	0.693666	0.110404	0.0701818	0.00141844	0.0432369	0.0453757	0.87069
BS00089968_51	0.76946	0.928129	0.68825	0.11324	0.0702333	0.00957447	0.0415305	0.0437566	0.639026
AX-158538215	0.904199	0.954912	0.529355	0.222272	0.0702395	0.00413712	0.0431847	0.0452667	0.819565
AX-110580885	0.894203	0.972835	0.743236	0.086367	0.0702963	0.00443262	0.0418975	0.0440857	0.765539
AX-158557658	0.490937	0.852368	0.709993	0.102116	0.0703065	0.0205083	0.0402863	0.0425975	0.412993
AX-95135748	0.490937	0.852368	0.709993	0.102116	0.0703065	0.0205083	0.0402863	0.0425975	0.412993
AX-158537076	0.703769	0.930306	0.764731	0.0769122	0.0703412	0.0125887	0.0424961	0.0448755	0.653587
RAC875_c18668_513	0.917561	0.973904	0.683455	0.115788	0.070342	0.0035461	0.0430146	0.0452055	0.821946
AX-95084761	0.917561	0.967209	0.602246	0.165113	0.070342	0.0035461	0.0430146	0.0452055	0.821946
AX-158553443	0.915753	0.969122	0.63348	0.144646	0.0703692	0.0035461	0.0420919	0.0443192	0.84173
AX-94463626	0.7402	0.979297	0.920313	0.0216467	0.0704712	0.0102837	0.0395831	0.0411078	0.543216
tplb0023b14_704	0.473479	0.746808	0.519123	0.231581	0.0705391	0.0218676	0.0415323	0.0432011	0.243897
wsnp_Ex_c946_1813956	0.895259	0.96178	0.6351	0.143639	0.0706387	0.00460993	0.0440125	0.0460653	0.79745
AX-158581324	0.82754	0.964562	0.794514	0.0646577	0.0708382	0.00744681	0.04318	0.0452176	0.645659
AX-94419507	0.802263	0.939954	0.696336	0.109022	0.0709339	0.00868794	0.0439369	0.0461368	0.69893
Tdurum_contig29033_75	0.802263	0.939954	0.696336	0.109022	0.0709339	0.00868794	0.0439369	0.0461368	0.69893
Tdurum_contig42729_433	0.802263	0.939954	0.696336	0.109022	0.0709339	0.00868794	0.0439369	0.0461368	0.69893
AX-94801818	0.891271	0.980344	0.81922	0.0551682	0.0709451	0.00443262	0.0407676	0.042897	0.788986
IAAV4125	0.959263	0.986171	0.660528	0.128485	0.0709871	0.00177305	0.0435239	0.0456826	0.869565
AX-158527194	0.921658	0.980485	0.750904	0.082932	0.0710517	0.00319149	0.0407377	0.0425209	0.792204
tplb0025i05_1836	0.921658	0.980485	0.750904	0.082932	0.0710517	0.00319149	0.0407377	0.0425209	0.792204
BS00068178_51	0.915562	0.973973	0.691764	0.111395	0.0710817	0.0035461	0.0419966	0.0441489	0.84173
Kukri_c14889_1086	0.915562	0.973973	0.691764	0.111395	0.0710817	0.0035461	0.0419966	0.0441489	0.84173
AX-110956320	0.945615	0.986202	0.746296	0.0849879	0.0711908	0.00236407	0.0434689	0.0456469	0.965385
Ku_c10387_272	0.710255	0.920453	0.72546	0.0946088	0.0712538	0.012234	0.0422234	0.0442758	0.631041
IAAV7841	0.458848	0.90753	0.829125	0.0515228	0.0712774	0.0225177	0.0416107	0.0439618	0.34014
AX-158586248	0.960934	0.982235	0.545243	0.208511	0.0712914	0.00177305	0.0453862	0.0475773	0.945578
AX-94515669	0.960934	0.982235	0.545243	0.208511	0.0712914	0.00177305	0.0453862	0.0475773	0.945578
BS00087043_51	0.960934	0.982235	0.545243	0.208511	0.0712914	0.00177305	0.0453862	0.0475773	0.945578
Excalibur_c56310_57	0.960934	0.982235	0.545243	0.208511	0.0712914	0.00177305	0.0453862	0.0475773	0.945578
AX-158559592	0.920978	0.971901	0.644411	0.137951	0.0713399	0.0035461	0.0448748	0.0468363	0.847343
RAC875_c16827_292	0.805282	0.951529	0.751073	0.0828573	0.0713792	0.00791962	0.0406722	0.0428563	0.679704
Tdurum_contig12836_418	0.939879	0.982859	0.714891	0.0997036	0.0714184	0.00265957	0.0442372	0.0467244	0.948718
AX-110958104	0.608327	0.887324	0.712322	0.100965	0.0714351	0.0160757	0.0410436	0.0434377	0.557755
AX-158562923	0.608327	0.887324	0.712322	0.100965	0.0714351	0.0160757	0.0410436	0.0434377	0.557755
RAC875_c14852_2171	0.945701	0.986921	0.759133	0.0793232	0.0714452	0.00236407	0.0435382	0.0463079	0.965385
RAC875_c33564_120	0.499335	0.884478	0.769263	0.0749862	0.0715024	0.0201537	0.0402538	0.0425512	0.406946
Ex_c898_1319	0.907663	0.980641	0.790347	0.0663169	0.0715051	0.00425532	0.0460845	0.0487586	0.84127
wsnp_Ex_c898_1738424	0.907663	0.980641	0.790347	0.0663169	0.0715051	0.00425532	0.0460845	0.0487586	0.84127
AX-94750198	0.928047	0.965931	0.526511	0.224824	0.0715573	0.00319149	0.0443549	0.0465902	0.839565
AX-110485532	0.894981	0.982765	0.835889	0.0490826	0.0715709	0.00460993	0.0438961	0.0459128	0.753166
AX-111150471	0.894981	0.982765	0.835889	0.0490826	0.0715709	0.00460993	0.0438961	0.0459128	0.753166
Kukri_rep_c89183_282	0.894981	0.982765	0.835889	0.0490826	0.0715709	0.00460993	0.0438961	0.0459128	0.753166
TA003589-0518	0.894981	0.982765	0.835889	0.0490826	0.0715709	0.00460993	0.0438961	0.0459128	0.753166
AX-109333618	0.960086	0.988984	0.723997	0.0953051	0.0716349	0.00177305	0.0444218	0.0466181	0.869565
Tdurum_contig9144_222	0.835557	0.949008	0.689909	0.112367	0.0716515	0.00691489	0.0420505	0.0441366	0.758025
Tdurum_contig93328_869	0.919744	0.974248	0.679126	0.11812	0.0716598	0.0035461	0.0441849	0.0466729	0.821946
TGWA25K-TG0291	0.674494	0.889436	0.660332	0.128598	0.0717028	0.0143026	0.0439395	0.0463331	0.538676
Ra_c11023_679	0.959977	0.987104	0.677778	0.118852	0.0717486	0.00177305	0.0443009	0.0468228	0.869565
wsnp_Ex_c14031_21934322	0.590853	0.93176	0.833213	0.0500432	0.0717652	0.0171986	0.0420352	0.0439379	0.454426
RFL_Contig5693_807	0.96074	0.982634	0.557652	0.198308	0.0717909	0.00177305	0.0451621	0.0472171	0.869565
Tdurum_contig9612_971	0.96074	0.982634	0.557652	0.198308	0.0717909	0.00177305	0.0451621	0.0472171	0.869565
BS00037094_51	0.96135	0.981989	0.533995	0.21817	0.0717981	0.00177305	0.0458747	0.0480746	0.945578
Tdurum_contig93710_409	0.96135	0.981989	0.533995	0.21817	0.0717981	0.00177305	0.0458747	0.0480746	0.945578
RAC875_c26400_88	0.455504	0.835593	0.698056	0.108137	0.0718068	0.0215721	0.0396185	0.0417442	0.37016
TA006276-0443	0.455504	0.835593	0.698056	0.108137	0.0718068	0.0215721	0.0396185	0.0417442	0.37016
wsnp_Ex_rep_c103497_88437811	0.455504	0.835593	0.698056	0.108137	0.0718068	0.0215721	0.0396185	0.0417442	0.37016
wsnp_Ex_rep_c68480_67305954	0.455504	0.835593	0.698056	0.108137	0.0718068	0.0215721	0.0396185	0.0417442	0.37016
AX-110417344	0.549008	0.863651	0.69767	0.108336	0.0718765	0.0187352	0.0415422	0.043908	0.451089
AX-111589160	0.549008	0.863651	0.69767	0.108336	0.0718765	0.0187352	0.0415422	0.043908	0.451089
BS00021895_51	0.549008	0.863651	0.69767	0.108336	0.0718765	0.0187352	0.0415422	0.043908	0.451089
Kukri_c25839_487	0.549008	0.863651	0.69767	0.108336	0.0718765	0.0187352	0.0415422	0.043908	0.451089
Kukri_c27717_316	0.549008	0.863651	0.69767	0.108336	0.0718765	0.0187352	0.0415422	0.043908	0.451089
Kukri_c32885_145	0.549008	0.863651	0.69767	0.108336	0.0718765	0.0187352	0.0415422	0.043908	0.451089
TA004365-0417	0.549008	0.863651	0.69767	0.108336	0.0718765	0.0187352	0.0415422	0.043908	0.451089
GENE-1350_36	0.95995	0.987637	0.691309	0.111633	0.0719121	0.00177305	0.0442706	0.046516	0.869565
Ra_c22880_760	0.95995	0.983363	0.584597	0.177645	0.0719121	0.00177305	0.0442706	0.046516	0.869565
AX-94842402	0.872174	0.964402	0.721515	0.0964931	0.0719176	0.00585106	0.0457735	0.0480282	0.716377
AX-158538218	0.960272	0.981116	0.524662	0.226497	0.0719235	0.00177305	0.0446294	0.0467964	0.869565
AX-158538236	0.960272	0.981116	0.524662	0.226497	0.0719235	0.00177305	0.0446294	0.0467964	0.869565
BS00081610_51	0.960272	0.981116	0.524662	0.226497	0.0719235	0.00177305	0.0446294	0.0467964	0.869565
Ex_c66357_866	0.960272	0.981116	0.524662	0.226497	0.0719235	0.00177305	0.0446294	0.0467964	0.869565
Kukri_c12079_204	0.960272	0.981116	0.524662	0.226497	0.0719235	0.00177305	0.0446294	0.0467964	0.869565
Tdurum_contig59585_656	0.960272	0.981116	0.524662	0.226497	0.0719235	0.00177305	0.0446294	0.0467964	0.869565
wsnp_CAP11_rep_c4226_1995152	0.960272	0.981116	0.524662	0.226497	0.0719235	0.00177305	0.0446294	0.0467964	0.869565
wsnp_Ex_rep_c66357_64540369	0.960272	0.981116	0.524662	0.226497	0.0719235	0.00177305	0.0446294	0.0467964	0.869565
wsnp_Ex_rep_c66357_64540428	0.960272	0.981116	0.524662	0.226497	0.0719235	0.00177305	0.0446294	0.0467964	0.869565
wsnp_Ra_c132_291198	0.960272	0.981116	0.524662	0.226497	0.0719235	0.00177305	0.0446294	0.0467964	0.869565
AX-158598968	0.959097	0.984349	0.617353	0.154954	0.0719393	0.00177305	0.0433478	0.0456298	0.884058
BS00075631_51	0.959097	0.984349	0.617353	0.154954	0.0719393	0.00177305	0.0433478	0.0456298	0.884058
AX-110558946	0.911591	0.983983	0.818827	0.0553149	0.0719733	0.0035461	0.0401101	0.0421176	0.870506
AX-94971944	0.911591	0.983983	0.818827	0.0553149	0.0719733	0.0035461	0.0401101	0.0421176	0.870506
wsnp_JD_c19278_17450210	0.911591	0.983983	0.818827	0.0553149	0.0719733	0.0035461	0.0401101	0.0421176	0.870506
Kukri_c90676_212	0.793234	0.951686	0.766332	0.0762293	0.0719748	0.00886525	0.0428758	0.0452248	0.767656
Ku_c12037_482	0.854208	0.932928	0.539944	0.213011	0.0720669	0.00650118	0.0445922	0.0467154	0.72894
Ra_c491_902	0.962022	0.983839	0.574469	0.185185	0.0720755	0.00177305	0.0466859	0.048659	0.850932
AX-94945263	0.853974	0.955969	0.698473	0.107924	0.0721176	0.00638298	0.0437113	0.0463218	0.722682
JD_c3082_514	0.961582	0.992797	0.812519	0.0576853	0.0721297	0.00177305	0.046151	0.0482717	0.974603
AX-89541420	0.600404	0.872749	0.68155	0.116811	0.0721577	0.0169622	0.0424484	0.0447876	0.506041
AX-110503524	0.861644	0.977663	0.838556	0.0481316	0.0721608	0.00585106	0.0422899	0.0442684	0.75179
AX-158542345	0.961668	0.981736	0.523538	0.227521	0.0721865	0.00177305	0.0462547	0.0484615	0.945578
AX-109866828	0.741835	0.96396	0.860397	0.0405634	0.0723619	0.0101655	0.0393759	0.0413621	0.562359
GENE-0120_397	0.897498	0.972654	0.733213	0.0909649	0.0723683	0.00443262	0.0432443	0.0454939	0.765539
AX-95142632	0.961891	0.981476	0.513905	0.236471	0.0724609	0.00177305	0.0465261	0.0487378	0.945578
Tdurum_contig47776_377	0.961891	0.981476	0.513905	0.236471	0.0724609	0.00177305	0.0465261	0.0487378	0.945578
Tdurum_contig59953_220	0.961891	0.981476	0.513905	0.236471	0.0724609	0.00177305	0.0465261	0.0487378	0.945578
AX-94538855	0.875826	0.973463	0.786293	0.0679477	0.0724622	0.00555556	0.0447399	0.0466655	0.738346
AX-94705091	0.571164	0.897869	0.76184	0.0781527	0.0724932	0.0187352	0.0436885	0.0459857	0.390099
AX-110974569	0.507525	0.876474	0.749174	0.083701	0.0725031	0.0205083	0.0416432	0.0439791	0.412993
Ku_c23207_988	0.507525	0.876474	0.749174	0.083701	0.0725031	0.0205083	0.0416432	0.0439791	0.412993
wsnp_CAP11_c323_263800	0.507525	0.876474	0.749174	0.083701	0.0725031	0.0205083	0.0416432	0.0439791	0.412993
AX-109901905	0.877639	0.969808	0.753258	0.0818918	0.0725178	0.00531915	0.0434709	0.045419	0.835897
AX-158552833	0.877639	0.969808	0.753258	0.0818918	0.0725178	0.00531915	0.0434709	0.045419	0.835897
AX-94740723	0.877639	0.969808	0.753258	0.0818918	0.0725178	0.00531915	0.0434709	0.045419	0.835897
Jagger_c555_287	0.877639	0.969808	0.753258	0.0818918	0.0725178	0.00531915	0.0434709	0.045419	0.835897
AX-95257656	0.741537	0.952012	0.814331	0.0570003	0.0725589	0.011052	0.0427605	0.0446971	0.634903
BobWhite_rep_c60245_107	0.969059	0.992028	0.74235	0.0867685	0.0726071	0.00141844	0.0458436	0.0479781	0.87069
AX-108886825	0.960819	0.981327	0.523421	0.227627	0.0726177	0.00177305	0.0452532	0.0475195	0.869565
Excalibur_c15389_501	0.773499	0.923818	0.663655	0.126702	0.0726468	0.0101064	0.0446196	0.0468166	0.52714
AX-158555676	0.921143	0.966371	0.573549	0.185883	0.072671	0.0035461	0.0449686	0.047195	0.821946
BS00074780_51	0.921143	0.966371	0.573549	0.185883	0.072671	0.0035461	0.0449686	0.047195	0.821946
BS00107555_51	0.921143	0.966371	0.573549	0.185883	0.072671	0.0035461	0.0449686	0.047195	0.821946
Ex_c4847_236	0.921143	0.966371	0.573549	0.185883	0.072671	0.0035461	0.0449686	0.047195	0.821946
Excalibur_c4847_631	0.921143	0.966371	0.573549	0.185883	0.072671	0.0035461	0.0449686	0.047195	0.821946
Excalibur_c74304_642	0.921143	0.966371	0.573549	0.185883	0.072671	0.0035461	0.0449686	0.047195	0.821946
IACX636	0.921143	0.966371	0.573549	0.185883	0.072671	0.0035461	0.0449686	0.047195	0.821946
Tdurum_contig44062_733	0.921143	0.966371	0.573549	0.185883	0.072671	0.0035461	0.0449686	0.047195	0.821946
Tdurum_contig56511_144	0.921143	0.966371	0.573549	0.185883	0.072671	0.0035461	0.0449686	0.047195	0.821946
AX-158535318	0.827251	0.96078	0.772964	0.0734305	0.0726924	0.00786052	0.0455026	0.0482439	0.698123
RAC875_c49136_59	0.827251	0.96078	0.772964	0.0734305	0.0726924	0.00786052	0.0455026	0.0482439	0.698123
wsnp_Ex_rep_c66315_64480670	0.827251	0.96078	0.772964	0.0734305	0.0726924	0.00786052	0.0455026	0.0482439	0.698123
GENE-3132_118	0.91768	0.977929	0.73189	0.0915816	0.0728124	0.0035461	0.043077	0.0453906	0.84173
BS00064654_51	0.733987	0.954161	0.82768	0.0520491	0.0728799	0.011052	0.0415468	0.0436436	0.477299
IAAV4514	0.733987	0.954161	0.82768	0.0520491	0.0728799	0.011052	0.0415468	0.0436436	0.477299
wsnp_Ra_c54050_57499377	0.733987	0.954161	0.82768	0.0520491	0.0728799	0.011052	0.0415468	0.0436436	0.477299
AX-158567176	0.854229	0.960166	0.726733	0.0940051	0.0729817	0.00638298	0.0437876	0.0460197	0.722682
JD_c2026_3994	0.717821	0.970201	0.894396	0.0295184	0.0730022	0.0108747	0.0385383	0.0404237	0.594606
Excalibur_c5416_846	0.959329	0.991213	0.783952	0.0688969	0.0730275	0.00177305	0.043595	0.0461892	0.884058
Ku_c71049_1180	0.959329	0.991213	0.783952	0.0688969	0.0730275	0.00177305	0.043595	0.0461892	0.884058
Tdurum_contig46583_2146	0.861428	0.939676	0.56467	0.192737	0.0730482	0.00620567	0.0447832	0.0468544	0.745786
AX-158529689	0.961187	0.987782	0.685221	0.114846	0.0730631	0.00177305	0.0456818	0.0478856	0.869565
AX-158535682	0.961187	0.987782	0.685221	0.114846	0.0730631	0.00177305	0.0456818	0.0478856	0.869565
Tdurum_contig75084_941	0.901335	0.979428	0.791502	0.0658553	0.0730774	0.00443262	0.0449258	0.0468095	0.765539
Excalibur_rep_c107047_469	0.58961	0.862855	0.665818	0.125478	0.0731088	0.0178487	0.0434921	0.0457406	0.466289
AX-89572658	0.885768	0.986319	0.880239	0.0340136	0.0731275	0.00460993	0.0403557	0.0423225	0.74063
RAC875_rep_c104791_336	0.682696	0.848491	0.522511	0.228458	0.0731676	0.0140071	0.044144	0.0463745	0.515099
Excalibur_c47452_183	0.960449	0.987353	0.680239	0.117518	0.073192	0.00177305	0.0448299	0.0472365	0.952381
Kukri_c28022_54	0.960981	0.986981	0.666344	0.125181	0.0732298	0.00177305	0.0454408	0.0479834	0.869565
IAAV4068	0.631499	0.936381	0.827356	0.0521672	0.0733071	0.0152482	0.041379	0.0437172	0.599944
IAAV8730	0.631499	0.936381	0.827356	0.0521672	0.0733071	0.0152482	0.041379	0.0437172	0.599944
AX-111476961	0.914577	0.979351	0.758273	0.0796966	0.0733245	0.00378251	0.0442796	0.0466562	0.854288
BS00037278_51	0.914577	0.979351	0.758273	0.0796966	0.0733245	0.00378251	0.0442796	0.0466562	0.854288
wsnp_Ku_c27759_37702654	0.914577	0.979351	0.758273	0.0796966	0.0733245	0.00378251	0.0442796	0.0466562	0.854288
Kukri_c17962_570	0.958596	0.989901	0.756086	0.0806502	0.0733626	0.00177305	0.0428233	0.0451949	0.895652
BS00091101_51	0.922222	0.968677	0.597275	0.168567	0.0733653	0.0035461	0.0455925	0.0479181	0.821946
Kukri_c31596_630	0.922222	0.968677	0.597275	0.168567	0.0733653	0.0035461	0.0455925	0.0479181	0.821946
Kukri_rep_c105330_552	0.922222	0.968677	0.597275	0.168567	0.0733653	0.0035461	0.0455925	0.0479181	0.821946
Kukri_rep_c75743_357	0.922222	0.968677	0.597275	0.168567	0.0733653	0.0035461	0.0455925	0.0479181	0.821946
RAC875_c7019_754	0.922222	0.968677	0.597275	0.168567	0.0733653	0.0035461	0.0455925	0.0479181	0.821946
RAC875_c81356_645	0.922222	0.968677	0.597275	0.168567	0.0733653	0.0035461	0.0455925	0.0479181	0.821946
RAC875_c81356_688	0.922222	0.968677	0.597275	0.168567	0.0733653	0.0035461	0.0455925	0.0479181	0.821946
wsnp_Ku_rep_c71755_71490557	0.922222	0.968677	0.597275	0.168567	0.0733653	0.0035461	0.0455925	0.0479181	0.821946
AX-158537078	0.777659	0.945668	0.755639	0.0808459	0.0733833	0.00992908	0.044657	0.0471805	0.772105
AX-86181093	0.777659	0.945668	0.755639	0.0808459	0.0733833	0.00992908	0.044657	0.0471805	0.772105
wsnp_CAP11_rep_c8708_3760250	0.777659	0.945668	0.755639	0.0808459	0.0733833	0.00992908	0.044657	0.0471805	0.772105
wsnp_Ex_c238_460841	0.777659	0.945668	0.755639	0.0808459	0.0733833	0.00992908	0.044657	0.0471805	0.772105
BS00045446_51	0.668272	0.953211	0.858955	0.0410514	0.0734342	0.0138889	0.0418682	0.044011	0.636387
BS00065390_51	0.668272	0.953211	0.858955	0.0410514	0.0734342	0.0138889	0.0418682	0.044011	0.636387
Tdurum_contig42962_2138	0.922984	0.981251	0.756555	0.080445	0.0734637	0.0035461	0.0460435	0.0482403	0.821946
TA004185-0581	0.737937	0.956838	0.835298	0.0492943	0.0734784	0.0115248	0.0439774	0.0461789	0.560072
AX-158552203	0.957137	0.991943	0.812029	0.0578708	0.0735434	0.00177305	0.041366	0.0434281	0.905138
wsnp_Ex_c4826_8610827	0.836317	0.978062	0.865973	0.0386926	0.0735784	0.00679669	0.0415235	0.0436773	0.771586
wsnp_JD_c10416_11077664	0.836317	0.978062	0.865973	0.0386926	0.0735784	0.00679669	0.0415235	0.0436773	0.771586
AX-109862715	0.920398	0.975589	0.693336	0.110575	0.073605	0.0035461	0.0445476	0.04708	0.84173
AX-111616946	0.920398	0.975589	0.693336	0.110575	0.073605	0.0035461	0.0445476	0.04708	0.84173
wsnp_BE399939A_Ta_2_1	0.920398	0.975589	0.693336	0.110575	0.073605	0.0035461	0.0445476	0.04708	0.84173
Kukri_c53506_1141	0.840066	0.985609	0.910021	0.0247189	0.0736487	0.00691489	0.0432359	0.0453701	0.620899
BS00033629_51	0.86635	0.979911	0.849691	0.0442246	0.0736515	0.00555556	0.0415678	0.0438239	0.714838
AX-89424925	0.968301	0.990924	0.713689	0.100293	0.0737758	0.00141844	0.0447466	0.0469967	0.885057
Ex_c3838_1252	0.917903	0.977761	0.729118	0.0928801	0.0738159	0.0035461	0.0431942	0.0456961	0.857557
wsnp_Ex_c3838_6980909	0.917903	0.977761	0.729118	0.0928801	0.0738159	0.0035461	0.0431942	0.0456961	0.857557
Jagger_c7991_95	0.889415	0.966034	0.69285	0.110829	0.073823	0.00496454	0.0448934	0.0475446	0.800578
AX-158542803	0.435964	0.828452	0.695856	0.109269	0.0738676	0.0231678	0.0410751	0.0432148	0.369388
RAC875_c101391_521	0.435964	0.828452	0.695856	0.109269	0.0738676	0.0231678	0.0410751	0.0432148	0.369388
wsnp_Ex_c21930_31102213	0.960157	0.987812	0.694107	0.110175	0.0738881	0.00177305	0.0445009	0.0469969	0.884058
IACX6241	0.85364	0.967937	0.780933	0.0701298	0.0739339	0.00638298	0.0436115	0.0459669	0.750414
AX-95155738	0.80101	0.958027	0.789072	0.0668278	0.0739477	0.00886525	0.0445512	0.0466361	0.577645
AX-94786026	0.906683	0.961813	0.590783	0.173167	0.0739582	0.00413712	0.0443338	0.0465649	0.839614
BS00063946_51	0.888519	0.967008	0.704058	0.105084	0.0740462	0.00520095	0.0466533	0.0489166	0.733718
Excalibur_c27023_134	0.777618	0.98	0.910064	0.024706	0.0740568	0.00939716	0.0422568	0.0444853	0.615047
BobWhite_c4942_140	0.563273	0.862354	0.684823	0.115058	0.0740731	0.0187352	0.0428992	0.0452896	0.451089
AX-94685504	0.905711	0.973523	0.719197	0.09761	0.0740754	0.00443262	0.0470111	0.0490753	0.818283
Excalibur_c46453_144	0.961233	0.987263	0.671456	0.122325	0.0740774	0.00177305	0.0457363	0.0482917	0.952381
AX-158551562	0.96102	0.988016	0.692555	0.110982	0.0740866	0.00177305	0.0454861	0.0476858	0.952381
RAC875_c9523_328	0.496671	0.940844	0.88247	0.0332957	0.0740965	0.0210402	0.0418021	0.0439949	0.494881
AX-111472995	0.734811	0.974451	0.903657	0.0266536	0.0741386	0.0111702	0.0421218	0.0442208	0.579859
AX-89668177	0.889701	0.980005	0.81872	0.0553547	0.0741457	0.00496454	0.0450096	0.0470585	0.726787
AX-158599821	0.707944	0.975721	0.916868	0.0226674	0.0741564	0.0120567	0.0412823	0.0428808	0.498086
Kukri_c40204_617	0.811576	0.938567	0.673965	0.120939	0.0741781	0.00868794	0.0461085	0.0482944	0.680159
AX-110577975	0.874224	0.974099	0.794069	0.064834	0.0742186	0.00555556	0.0441704	0.0465331	0.764512
Kukri_c2164_1856	0.962132	0.982072	0.526559	0.22478	0.0742326	0.00177305	0.0468216	0.0490462	0.869565
AX-158547131	0.651712	0.894094	0.695925	0.109234	0.0742547	0.0151891	0.0436108	0.0461436	0.527279
BobWhite_rep_c64068_241	0.521858	0.849566	0.685378	0.114762	0.0742729	0.0205083	0.0428916	0.0452501	0.412993
BS00059503_51	0.923721	0.965486	0.547531	0.206595	0.0743453	0.0035461	0.0464884	0.0487424	0.821946
BobWhite_c8037_1135	0.625569	0.915016	0.773031	0.0734024	0.0743748	0.0160757	0.0429335	0.0451638	0.557755
Jagger_c1432_289	0.941233	0.984383	0.734259	0.0904791	0.0743767	0.00265957	0.0452563	0.0473706	0.881481
AX-110937882	0.576952	0.856881	0.661697	0.127817	0.0743979	0.0187352	0.0442862	0.0466271	0.463713
AX-94504714	0.576952	0.856881	0.661697	0.127817	0.0743979	0.0187352	0.0442862	0.0466271	0.463713
Tdurum_contig28828_664	0.962307	0.985741	0.621699	0.152124	0.0744505	0.00177305	0.0470387	0.0492672	0.869565
wsnp_JD_c2297_3138694	0.545583	0.889557	0.756957	0.0802696	0.0744561	0.0193262	0.0425298	0.0450789	0.547937
AX-108928765	0.853961	0.940173	0.590337	0.173487	0.07451	0.00650118	0.0445168	0.0469405	0.759058
AX-95185536	0.802219	0.972419	0.860549	0.0405121	0.0745755	0.00815603	0.0412377	0.0432673	0.649808
wsnp_Ku_c17017_26019611	0.928842	0.977682	0.686358	0.114241	0.0745975	0.00319149	0.0448509	0.0473386	0.857391
AX-158527727	0.905519	0.970104	0.683574	0.115725	0.0746641	0.00443262	0.0469156	0.0492183	0.837819
IAAV7349	0.905519	0.970104	0.683574	0.115725	0.0746641	0.00443262	0.0469156	0.0492183	0.837819
AX-109962346	0.927652	0.98156	0.745118	0.0855172	0.0746747	0.00319149	0.0441132	0.0463851	0.792204
wsnp_BG608232B_Ta_2_2	0.927652	0.98156	0.745118	0.0855172	0.0746747	0.00319149	0.0441132	0.0463851	0.792204
AX-94765269	0.872758	0.973911	0.794968	0.064478	0.0746974	0.00585106	0.0459837	0.0485429	0.834098
BS00043286_51	0.872758	0.973911	0.794968	0.064478	0.0746974	0.00585106	0.0459837	0.0485429	0.834098
AX-94607423	0.878542	0.981678	0.84915	0.044412	0.0747036	0.00549645	0.045254	0.0474367	0.686437
RAC875_rep_c114991_62	0.732308	0.969032	0.884315	0.0327046	0.0747288	0.0111702	0.0417278	0.0437525	0.56017
AX-158542561	0.921595	0.97729	0.710351	0.101939	0.0747494	0.0035461	0.0452278	0.0478847	0.84173
AX-94723827	0.921595	0.97729	0.710351	0.101939	0.0747494	0.0035461	0.0452278	0.0478847	0.84173
Kukri_c49033_52	0.921595	0.97729	0.710351	0.101939	0.0747494	0.0035461	0.0452278	0.0478847	0.84173
AX-94635280	0.94309	0.984534	0.728242	0.0932926	0.0748102	0.00265957	0.0467333	0.0488432	0.963636
RAC875_rep_c71561_619	0.35742	0.762861	0.630958	0.146223	0.0748245	0.0293735	0.0457119	0.0480155	0.270631
wsnp_Ex_c2352_4405961	0.759254	0.967663	0.865682	0.0387898	0.074836	0.00998818	0.0414884	0.0434491	0.617966
AX-94423840	0.746197	0.926225	0.70932	0.10245	0.0748589	0.0111111	0.0437785	0.0460513	0.687365
AX-109977653	0.924688	0.965024	0.535592	0.216773	0.0749766	0.0035461	0.0470854	0.0493503	0.821946
Ra_c2655_504	0.924688	0.965024	0.535592	0.216773	0.0749766	0.0035461	0.0470854	0.0493503	0.821946
AX-95240882	0.791859	0.955527	0.786332	0.067932	0.0750362	0.00880615	0.0423085	0.0447171	0.750545
Excalibur_c15844_1470	0.880318	0.977682	0.813524	0.0573049	0.0750828	0.00496454	0.0414812	0.043536	0.795091
AX-110060604	0.961886	0.983433	0.565322	0.192226	0.0750887	0.00177305	0.04652	0.0488139	0.952381
AX-158525602	0.921686	0.9752	0.683321	0.11586	0.0751074	0.0035461	0.0452807	0.0477384	0.84173
GENE-1584_692	0.962307	0.982705	0.541167	0.211965	0.0751508	0.00177305	0.0470387	0.0493345	0.869565
Kukri_c17962_379	0.91982	0.979636	0.746023	0.0851104	0.0752761	0.0035461	0.044227	0.0466596	0.857557
BobWhite_c5095_634	0.461737	0.866462	0.751909	0.0824869	0.0753096	0.0229905	0.0427124	0.0450946	0.39998
AX-158533529	0.848943	0.976296	0.843079	0.046532	0.0753595	0.0070922	0.0469506	0.0491609	0.646658
AX-158522631	0.575411	0.834498	0.610207	0.159697	0.0753721	0.0187352	0.0441256	0.0461643	0.451089
wsnp_JD_c7325_8422075	0.899997	0.969795	0.697956	0.108189	0.0754448	0.00443262	0.044325	0.0464067	0.788986
AX-94483043	0.744995	0.94894	0.799768	0.0625908	0.0755128	0.0121158	0.0475122	0.0498207	0.705092
AX-158583982	0.92597	0.968516	0.574707	0.185004	0.0755137	0.0035461	0.047901	0.0503808	0.821946
AX-158564834	0.796684	0.928238	0.647042	0.136374	0.0755512	0.00957447	0.0470916	0.0496706	0.663676
BS00094342_51	0.796684	0.928238	0.647042	0.136374	0.0755512	0.00957447	0.0470916	0.0496706	0.663676
GENE-4277_295	0.520025	0.851391	0.690381	0.112119	0.0755794	0.023818	0.0496233	0.0527217	0.55341
BobWhite_c11512_157	0.750814	0.92309	0.691354	0.111609	0.0755914	0.0111111	0.0445897	0.0472257	0.637914
BobWhite_c3392_749	0.94217	0.979029	0.637363	0.142241	0.0756261	0.00265957	0.0459892	0.0484809	0.881481
IACX1008	0.961269	0.983944	0.585444	0.177026	0.0756421	0.00177305	0.0457785	0.0480945	0.884058
AX-108815870	0.961244	0.987704	0.682733	0.116175	0.075658	0.00177305	0.0457493	0.0482679	0.884058
BS00093895_51	0.913478	0.977246	0.737016	0.0892055	0.075683	0.00413712	0.047816	0.0501953	0.83495
BS00010012_51	0.832834	0.964532	0.78783	0.0673273	0.0757533	0.00738771	0.0441939	0.0465134	0.780833
AX-94479272	0.922751	0.975372	0.681183	0.117008	0.0758016	0.0035461	0.0459046	0.0484616	0.84173
RAC875_rep_c78007_394	0.8916	0.986248	0.873141	0.0363225	0.0758663	0.00460993	0.0425268	0.0445331	0.74063
AX-158590367	0.926052	0.970159	0.596461	0.169139	0.0758717	0.0035461	0.0479538	0.0502345	0.821946
AX-94768083	0.926052	0.960799	0.46988	0.282051	0.0758717	0.0035461	0.0479538	0.0502345	0.821946
Kukri_c12910_908	0.926052	0.960799	0.46988	0.282051	0.0758717	0.0035461	0.0479538	0.0502345	0.821946
wsnp_Ex_c210_411604	0.926052	0.960799	0.46988	0.282051	0.0758717	0.0035461	0.0479538	0.0502345	0.821946
AX-158614912	0.252092	0.821189	0.760918	0.0785505	0.075904	0.0336035	0.04493	0.0473677	0.415647
AX-158537853	0.962864	0.987176	0.654682	0.131865	0.0759153	0.00177305	0.0477443	0.0500529	0.869565
AX-158546534	0.962864	0.982473	0.52804	0.223449	0.0759153	0.00177305	0.0477443	0.0500529	0.869565
wsnp_Ex_c10838_17631243	0.962864	0.982473	0.52804	0.223449	0.0759153	0.00177305	0.0477443	0.0500529	0.869565
AX-94567799	0.929037	0.987124	0.818549	0.0554183	0.0759372	0.00319149	0.0449737	0.0475392	0.792204
AX-158556159	0.911768	0.967132	0.627477	0.148421	0.0759496	0.00407801	0.0462193	0.0485936	0.839473
tplb0062a17_679	0.918197	0.979354	0.747613	0.0843978	0.0760854	0.00378251	0.0462392	0.0488719	0.854288
wsnp_Ex_c2400_4498931	0.918197	0.979354	0.747613	0.0843978	0.0760854	0.00378251	0.0462392	0.0488719	0.854288
tplb0045c06_1675	0.96276	0.98293	0.541631	0.211569	0.0761349	0.00177305	0.0476116	0.0498963	0.952381
AX-109906711	0.770026	0.957449	0.814973	0.0567585	0.076138	0.00963357	0.0418898	0.0440467	0.597082
GENE-0675_104	0.770026	0.957449	0.814973	0.0567585	0.076138	0.00963357	0.0418898	0.0440467	0.597082
Kukri_c4294_371	0.770026	0.957449	0.814973	0.0567585	0.076138	0.00963357	0.0418898	0.0440467	0.597082
Kukri_c97631_275	0.770026	0.957449	0.814973	0.0567585	0.076138	0.00963357	0.0418898	0.0440467	0.597082
Ra_c68109_376	0.770026	0.957449	0.814973	0.0567585	0.076138	0.00963357	0.0418898	0.0440467	0.597082
TA002269-1202	0.770026	0.957449	0.814973	0.0567585	0.076138	0.00963357	0.0418898	0.0440467	0.597082
wsnp_Ex_c2445_4573233	0.770026	0.957449	0.814973	0.0567585	0.076138	0.00963357	0.0418898	0.0440467	0.597082
AX-158567306	0.696491	0.926479	0.757764	0.0799182	0.0761524	0.0136525	0.0449822	0.0472111	0.564488
AX-158567449	0.962909	0.98659	0.638455	0.14157	0.0761711	0.00177305	0.047803	0.0503025	0.952381
Tdurum_contig51001_186	0.962909	0.98659	0.638455	0.14157	0.0761711	0.00177305	0.047803	0.0503025	0.952381
Tdurum_contig5646_929	0.962909	0.98659	0.638455	0.14157	0.0761711	0.00177305	0.047803	0.0503025	0.952381
RAC875_c8045_231	0.878943	0.978867	0.825427	0.0528735	0.0762293	0.00549645	0.0454037	0.04816	0.686437
Tdurum_contig45559_403	0.960466	0.990349	0.755884	0.0807385	0.0762535	0.00177305	0.0448484	0.0470924	0.895652
AX-110464878	0.969412	0.993551	0.789157	0.0667937	0.0763074	0.00141844	0.0463726	0.0487799	0.885057
RAC875_c1499_568	0.879705	0.952814	0.607748	0.161355	0.0763504	0.00582573	0.0484288	0.0507181	0.795126
RFL_Contig5787_2311	0.647728	0.888587	0.68373	0.115641	0.0763515	0.0157801	0.0447953	0.0473166	0.525493
AX-158534484	0.902226	0.962943	0.620993	0.152581	0.0763567	0.00460993	0.0471487	0.0493018	0.819955
AX-94388422	0.92442	0.976461	0.68856	0.113076	0.0764231	0.0035461	0.0469183	0.0489148	0.84173
TGWA25K-TG0233	0.923659	0.975507	0.679166	0.118099	0.0764251	0.0035461	0.0464509	0.0492058	0.84173
AX-109277512	0.748025	0.914999	0.662661	0.127267	0.0764326	0.011643	0.046207	0.0487085	0.633025
AX-158537210	0.912226	0.980067	0.772907	0.0734543	0.0764484	0.00425532	0.0484804	0.0510971	0.861111
AX-158563487	0.926348	0.964868	0.522994	0.228017	0.0764524	0.0035461	0.0481468	0.0504908	0.837986
wsnp_Ex_c36937_44788679	0.821899	0.955848	0.752098	0.0824037	0.076511	0.00803783	0.0451307	0.0476593	0.757748
BS00081132_51	0.962375	0.988446	0.692904	0.1108	0.076598	0.00177305	0.0471248	0.0493489	0.884058
AX-94633200	0.917313	0.974828	0.695578	0.109413	0.0766027	0.00378251	0.0457451	0.0482015	0.868859
AX-158578680	0.96277	0.987209	0.656438	0.130843	0.076625	0.00177305	0.0476248	0.0501701	0.952381
Excalibur_c94139_55	0.520209	0.857653	0.703313	0.10546	0.0768601	0.0215721	0.0449615	0.0472953	0.312902
BS00023337_51	0.923787	0.974975	0.671638	0.122224	0.0768772	0.0035461	0.0465291	0.0490095	0.84173
AX-94872426	0.812362	0.970025	0.840249	0.0475308	0.0768961	0.00839243	0.0447268	0.0472363	0.617435
AX-94833805	0.94168	0.989473	0.819495	0.0550658	0.0769407	0.00265957	0.0456031	0.0477717	0.893333
BS00041232_51	0.822291	0.965649	0.806703	0.0599034	0.0769953	0.00821513	0.0462279	0.0487375	0.579655
RAC875_rep_c112818_307	0.648633	0.931834	0.805998	0.0601746	0.0769994	0.0161348	0.0459199	0.0484996	0.573618
AX-108882320	0.97015	0.991364	0.71069	0.101771	0.0770664	0.00141844	0.0475187	0.0498835	0.885057
wsnp_Ra_c9755_16200944	0.924339	0.967612	0.571932	0.187115	0.0770744	0.0035461	0.0468683	0.0491825	0.84173
Tdurum_contig13117_1316	0.962186	0.987594	0.671909	0.122074	0.0771392	0.00177305	0.0468891	0.0494285	0.884058
Tdurum_contig12722_779	0.882395	0.971204	0.755149	0.0810606	0.0773141	0.00555556	0.0472391	0.0498096	0.798285
Kukri_c15912_2330	0.939015	0.990921	0.851125	0.0437289	0.0773172	0.00283688	0.0465176	0.0487002	0.793103
Kukri_c15912_860	0.939015	0.990921	0.851125	0.0437289	0.0773172	0.00283688	0.0465176	0.0487002	0.793103
AX-158543831	0.963281	0.988447	0.685363	0.11477	0.0773175	0.00177305	0.0482864	0.0507009	0.952381
AX-109433082	0.813606	0.940378	0.68013	0.117577	0.0773246	0.00856974	0.0459764	0.0485207	0.645008
AX-109331529	0.84994	0.96067	0.737904	0.0887975	0.0773497	0.0070922	0.0472623	0.0498331	0.809984
AX-158555892	0.84994	0.96067	0.737904	0.0887975	0.0773497	0.0070922	0.0472623	0.0498331	0.809984
wsnp_BG263758B_Ta_2_1	0.84994	0.96067	0.737904	0.0887975	0.0773497	0.0070922	0.0472623	0.0498331	0.809984
Tdurum_contig17697_771	0.897617	0.985284	0.856264	0.0419661	0.0773548	0.00460993	0.0450261	0.0473606	0.717051
wsnp_CAP11_c2142_1128735	0.904242	0.974702	0.735814	0.0897599	0.0774258	0.00460993	0.0481414	0.0504207	0.742449
Kukri_c1214_2316	0.947629	0.983335	0.681791	0.116681	0.0774327	0.00236407	0.0451405	0.0476769	0.894118
AX-158582675	0.96397	0.981736	0.493098	0.256999	0.0774417	0.00177305	0.0492098	0.051545	0.869565
Tdurum_contig62286_271	0.96397	0.981736	0.493098	0.256999	0.0774417	0.00177305	0.0492098	0.051545	0.869565
wsnp_Ex_c46576_52042185	0.896269	0.964171	0.654602	0.131912	0.0774548	0.00496454	0.0478595	0.0501608	0.726787
wsnp_JD_c47318_32176833	0.896269	0.964171	0.654602	0.131912	0.0774548	0.00496454	0.0478595	0.0501608	0.726787
Excalibur_c44713_137	0.47831	0.8655	0.742183	0.086844	0.0775063	0.0229905	0.0440694	0.0464762	0.39998
AX-158558905	0.558589	0.847465	0.654437	0.132008	0.0775074	0.0201537	0.0456574	0.0480456	0.413893
AX-111130452	0.924796	0.97515	0.669568	0.123375	0.0775715	0.0035461	0.0471529	0.0497326	0.84173
AX-158565056	0.924796	0.97515	0.669568	0.123375	0.0775715	0.0035461	0.0471529	0.0497326	0.84173
AX-158584527	0.924796	0.97515	0.669568	0.123375	0.0775715	0.0035461	0.0471529	0.0497326	0.84173
BS00110075_51	0.924796	0.97515	0.669568	0.123375	0.0775715	0.0035461	0.0471529	0.0497326	0.84173
tplb0057g20_780	0.61802	0.930164	0.817174	0.0559325	0.0776179	0.0166667	0.0436323	0.0459758	0.612081
AX-158599776	0.964535	0.985215	0.583111	0.178735	0.0776683	0.00177305	0.0499947	0.0525105	0.952381
Ra_c8939_653	0.964535	0.985215	0.583111	0.178735	0.0776683	0.00177305	0.0499947	0.0525105	0.952381
Tdurum_contig68343_339	0.964535	0.985215	0.583111	0.178735	0.0776683	0.00177305	0.0499947	0.0525105	0.952381
wsnp_Ku_c29780_39658445	0.964535	0.985215	0.583111	0.178735	0.0776683	0.00177305	0.0499947	0.0525105	0.952381
Tdurum_contig42140_871	0.629123	0.872837	0.65713	0.130442	0.0776824	0.0163712	0.0441418	0.0464808	0.507006
AX-110571065	0.897254	0.985333	0.857248	0.041631	0.0776849	0.00460993	0.0448673	0.0471457	0.77728
Tdurum_contig93283_513	0.961433	0.988791	0.709349	0.102436	0.0777081	0.00177305	0.0459735	0.0485331	0.895652
TA002095-0637	0.765058	0.966902	0.859123	0.0409943	0.0777335	0.011052	0.0470415	0.0490096	0.627203
Tdurum_contig28305_106	0.944337	0.987386	0.773381	0.0732559	0.0779012	0.00265957	0.0477796	0.0501965	0.881481
AX-109963861	0.964324	0.98093	0.465473	0.287088	0.077934	0.00177305	0.0496983	0.0520424	0.869565
AX-158559736	0.849425	0.966521	0.777657	0.0714786	0.078026	0.00756501	0.0502407	0.0528539	0.704498
BS00022202_51	0.849425	0.966521	0.777657	0.0714786	0.078026	0.00756501	0.0502407	0.0528539	0.704498
BS00077891_51	0.849425	0.966521	0.777657	0.0714786	0.078026	0.00756501	0.0502407	0.0528539	0.704498
AX-110515117	0.736528	0.949323	0.807658	0.0595371	0.0780515	0.0114066	0.0432934	0.0455114	0.567778
CAP7_rep_c5636_102	0.736528	0.949323	0.807658	0.0595371	0.0780515	0.0114066	0.0432934	0.0455114	0.567778
Ra_c4051_1010	0.736528	0.949323	0.807658	0.0595371	0.0780515	0.0114066	0.0432934	0.0455114	0.567778
TA002671-0128-w	0.736528	0.949323	0.807658	0.0595371	0.0780515	0.0114066	0.0432934	0.0455114	0.567778
wsnp_Ex_c24711_33964543	0.736528	0.949323	0.807658	0.0595371	0.0780515	0.0114066	0.0432934	0.0455114	0.567778
RAC875_c31031_387	0.459188	0.902971	0.820586	0.0546602	0.078055	0.0244681	0.0452432	0.0473124	0.425227
wsnp_Ex_c11246_18191331	0.846244	0.962497	0.756084	0.080651	0.0780777	0.0070922	0.0461264	0.0487247	0.828986
IAAV7428	0.554026	0.845137	0.652753	0.132993	0.0780831	0.0205083	0.0459854	0.0484002	0.412993
AX-158548800	0.812507	0.939484	0.677234	0.119149	0.078096	0.00916076	0.0488591	0.0511451	0.640539
AX-158561697	0.963194	0.981557	0.49893	0.251072	0.0781034	0.00177305	0.0481724	0.0505349	0.884058
AX-158558835	0.923857	0.976488	0.691209	0.111685	0.078122	0.0035461	0.0465715	0.0490959	0.857557
BS00062939_51	0.923857	0.976488	0.691209	0.111685	0.078122	0.0035461	0.0465715	0.0490959	0.857557
AX-158544997	0.755677	0.941713	0.761435	0.0783274	0.0781591	0.0108747	0.0445095	0.0466608	0.560824
AX-158560814	0.755677	0.941713	0.761435	0.0783274	0.0781591	0.0108747	0.0445095	0.0466608	0.560824
Tdurum_contig55429_116	0.755677	0.941713	0.761435	0.0783274	0.0781591	0.0108747	0.0445095	0.0466608	0.560824
Tdurum_contig55429_147	0.755677	0.941713	0.761435	0.0783274	0.0781591	0.0108747	0.0445095	0.0466608	0.560824
Excalibur_c57482_473	0.877678	0.978296	0.822568	0.0539263	0.0781694	0.00585106	0.0478334	0.050347	0.685537
AX-158542387	0.934919	0.981547	0.716459	0.0989382	0.0781719	0.00319149	0.0490385	0.0513732	0.769115
Ku_c6791_519	0.644093	0.864785	0.620085	0.153171	0.0782735	0.0169622	0.0476589	0.0500929	0.506041
AX-109333268	0.90202	0.983323	0.829796	0.0512789	0.0782822	0.00443262	0.0452403	0.0474068	0.808169
AX-110945767	0.90202	0.983323	0.829796	0.0512789	0.0782822	0.00443262	0.0452403	0.0474068	0.808169
AX-158587973	0.90202	0.983323	0.829796	0.0512789	0.0782822	0.00443262	0.0452403	0.0474068	0.808169
BobWhite_c23903_443	0.484942	0.830532	0.670973	0.122593	0.0783515	0.0227879	0.0442434	0.0464518	0.421831
Excalibur_c23777_74	0.963	0.984986	0.594224	0.170717	0.0783967	0.00177305	0.0479203	0.0504785	0.884058
BS00027006_51	0.774093	0.946032	0.761103	0.0784706	0.0784597	0.010461	0.0463067	0.0487099	0.639779
wsnp_Ku_c13952_22097856	0.774093	0.946032	0.761103	0.0784706	0.0784597	0.010461	0.0463067	0.0487099	0.639779
AX-108843273	0.961858	0.988099	0.687977	0.113384	0.0784869	0.00177305	0.0464859	0.0487117	0.895652
IAAV51	0.961858	0.988099	0.687977	0.113384	0.0784869	0.00177305	0.0464859	0.0487117	0.895652
Tdurum_contig10426_280	0.961858	0.988099	0.687977	0.113384	0.0784869	0.00177305	0.0464859	0.0487117	0.895652
[truncated: 6,180 more rows]

## Sheet: Sheet2
1	wsnp_Ku_c1307_2606226
2	Excalibur_c97157_65
	Tdurum_contig10210_425
	CAP12_rep_c4520_207
	Excalibur_c15733_252
	Excalibur_c3108_5476
	Tdurum_contig48302_532
	AX-109420889
	AX-110039270
	AX-111656814
	AX-158523658
	AX-158533097
	AX-158537282
	AX-158538742
	AX-158540295
	AX-158547881
	AX-158548020
	AX-158585004
	AX-94863436
	BobWhite_c45118_495
	BobWhite_c9057_118
	BS00065529_51
	CAP12_c5387_372
	Ex_c7397_535
	Excalibur_c113078_320
	Excalibur_c16569_535
	Excalibur_c56240_200
	Excalibur_c9617_292
	Excalibur_rep_c79404_164
	GENE-3314_78
	Kukri_c1308_2782
	Kukri_rep_c69970_717
	RAC875_c1227_1098
	RAC875_c21280_2176
	RAC875_c47550_437
	wsnp_Ex_c16569_25082817
	wsnp_Ex_c18223_27035083
	wsnp_Ex_c2181_4089639
	wsnp_Ex_c8517_14315660
	wsnp_Ex_rep_c67786_66472676
	BS00024548_51
	AX-158543779
	AX-158561966
	AX-158575264
	AX-158621051
	AX-95119354
	BS00022940_51
	BS00089734_51
	BS00099097_51
	Excalibur_c6876_523
	Excalibur_c99477_90
	IAAV2784
	IAAV3789
	Kukri_c15594_386
	Kukri_c40953_658
	Kukri_c7139_6288
	RAC875_c25277_324
	RAC875_c7988_1588
	RFL_Contig1385_326
	RFL_Contig189_894
	Tdurum_contig61682_187
	TGWA25K-TG0239
	TGWA25K-TG0288
	wsnp_Ex_c14595_22634031
	wsnp_Ex_rep_c67671_66332423
	wsnp_Ra_c16813_25556454
	RAC875_c41476_217
	AX-158529799
	AX-158586107
	AX-94721806
	AX-94814963
	AX-95130702
	RAC875_rep_c101299_88
	wsnp_Ex_c12102_19361467
	AX-108953209
	AX-111055262
	AX-158525581
	AX-158541420
	AX-158542785
	AX-158542876
	AX-158550750
	AX-158565042
	AX-158565499
	AX-158565675
	AX-158589283
	AX-158604296
	AX-86163895
	AX-94457680
	AX-94550326
	AX-94602689
	AX-94884814
	AX-94974108
	BS00000006_51
	BS00022098_51
	BS00029869_51
	Ex_c2171_2600
	Ex_c2615_564
	Excalibur_c59894_97
	GENE-2673_1010
	GENE-3983_99
	Ku_c11429_519
	Ku_c12469_983
	Kukri_c17997_389
	Kukri_c441_891
	Kukri_c44442_274
	Kukri_c5594_717
	Kukri_c62247_248
	Kukri_c8288_2063
	Ra_c1726_1071
	Ra_c73292_443
	RAC875_c48885_107
	RAC875_c48885_142
	RAC875_c86680_391
	Tdurum_contig10843_745
	Tdurum_contig17230_542
	Tdurum_contig50175_875
	wsnp_Ex_c1924_3630249
	wsnp_Ex_c2171_4072774
	wsnp_Ex_c2171_4072995
	wsnp_Ex_c2171_4073721
	wsnp_Ex_c2615_4862266
	wsnp_Ex_c40019_47166980
	wsnp_Ex_c4883_8705816
	AX-110387993
	Tdurum_contig14863_916
	AX-158560436
	AX-158569255
	GENE-2944_81
	Kukri_c60966_261
	AX-158538892
	AX-158564434
	AX-94401336
	AX-94661712
	AX-95153132
	BS00064935_51
	BS00065555_51
	Ex_c12584_2014
	Ex_c25689_1606
	Ku_c23960_333
	Ra_c59822_1439
	AX-158527166
	AX-158567071
	AX-158584239
	AX-158587853
	AX-158588008
	AX-158591089
	AX-94426042
	AX-94702510
	BS00022605_51
	BS00023089_51
	BS00024191_51
	BS00065079_51
	BS00078715_51
	BS00087178_51
	BS00111120_51
	Excalibur_c49239_97
	Excalibur_c60816_99
	IAAV1385
	IAAV6535
	Kukri_c1281_515
	RAC875_c60707_1852
	TA001414-0867
	Tdurum_contig10194_765
	TG0140
	TGWA25K-TG0140
	wsnp_Ex_c1104_2118684
	wsnp_Ex_c18965_27868480
	wsnp_Ex_c29350_38393488
	wsnp_Ku_c3354_6228863
	wsnp_Ku_c8394_14267750
	AX-94631158
	RAC875_c65707_171
	wsnp_Ex_c2181_4089788
	AX-158600321
	BS00021965_51
	tplb0047k12_1370
	BS00016407_51
	AX-158557929
	RAC875_rep_c107081_918
	AX-158567562
	AX-95244112
	AX-158525572
	AX-158558966
	AX-158556269
	AX-158559665
	AX-94386402
	AX-94756419
	BS00021659_51
	BS00059928_51
	BS00079443_51
	GENE-4270_242
	RAC875_c1227_1471
	RAC875_rep_c105182_460
	wsnp_CAP11_c1761_958064
	wsnp_CAP12_c1461_744121
	wsnp_Ex_c19214_28132186
	wsnp_Ex_c6059_10615895
	wsnp_Ex_c7833_13327323
	wsnp_Ku_c3201_5970486
	wsnp_Ra_c40910_48252997
	wsnp_Ra_rep_c105182_89171305
	wsnp_RFL_Contig1510_707132
	AX-158567178
	BS00033795_51
	RAC875_c79370_378
	Tdurum_contig78006_158
	BS00074997_51
	AX-94406390
	BS00063977_51
	AX-94999423
	AX-158555683
	AX-158562058
	BS00069273_51
	Tdurum_contig6121_907
	Tdurum_contig66015_346
	D_GBUVHFX01API9H_416
	AX-109911820
	BobWhite_c45623_215
	BS00037898_51
	Tdurum_contig31586_197
	wsnp_Ex_c11439_18459047
	wsnp_Ex_c5378_9505533
	AX-108931696
	AX-158527167
	AX-94538713
	Kukri_c2700_1137
	TA004947-0758
	Tdurum_contig42125_5692
	BS00092631_51
	AX-158542384
	RAC875_c45747_87
	AX-95248867
	BS00063458_51
	BS00063460_51
	CAP7_c7296_88
	BS00036211_51
	BS00064632_51
	BS00086046_51
	IAAV5967
	Kukri_c38882_391
	TA002574-0890
	wsnp_Ku_c1549_3054996
	AX-109363759
	BS00036352_51
	wsnp_Ex_c5457_9632050
	AX-95015593
	BS00064146_51
	Tdurum_contig25513_123
	AX-158541281
	AX-158541564
	AX-158572374
	BobWhite_c9424_243
	BS00038663_51
	BS00038664_51
	Tdurum_contig13548_158
	Tdurum_contig27887_55
	tplb0059m03_622
	wsnp_BG607088A_Ta_1_1
	Jagger_c10188_98
	AX-158563564
	AX-110990896
	AX-158538654
	Tdurum_contig33207_282
	RAC875_c30381_573
	RFL_Contig1675_153
	AX-158527857
	CAP11_c989_113
	CAP7_c2381_149
	AX-111521612
	BS00091257_51
	wsnp_Ex_c13284_20948460
	Tdurum_contig53926_455
	AX-158534488
	wsnp_Ex_c2288_4293430
	wsnp_BE403421A_Ta_2_1
	AX-89711353
	RAC875_c17197_504
	BS00099729_51
	Excalibur_c97201_294
	IAAV3972
	Kukri_rep_c105119_190
	RAC875_c6409_476
	wsnp_Ex_c658_1294003
	Tdurum_contig30558_109
	AX-158525919
	BS00068106_51
	wsnp_Ku_rep_c101212_88410320
	AX-109883040
	AX-110940891
	AX-111141635
	AX-111509567
	AX-111539931
	AX-158525569
	AX-89422431
	Tdurum_contig12066_126
	tplb0027f13_1493
	AX-110434151
	TA006422-1750
	RAC875_c56535_256
	AX-158537982
	BS00031073_51
	Tdurum_contig8348_831
	Excalibur_c2171_2728
	IAAV7226
	AX-158538667
	BS00099804_51
	BS00106144_51
	BobWhite_c26374_339
	AX-89465561
	Kukri_c40149_436
	wsnp_Ex_c54357_57265797
	AX-158559574
	BS00022747_51
	AX-158568213
	tplb0050h15_1287
	wsnp_Ex_c2148_4035913
	wsnp_Ex_c32003_40728918
	AX-158601093
	Tdurum_contig8028_870
	AX-95205191
	Tdurum_contig10107_580
	wsnp_BQ159467B_Ta_2_2
	AX-94435238
	AX-94932563
	Kukri_rep_c73477_888
	wsnp_Ku_c18538_27857915
	Excalibur_c25599_358
	AX-95025823
	BS00039187_51
	Tdurum_contig9731_121
	Kukri_c8718_193
	tplb0041o08_752
	AX-158554053
	RAC875_c48766_224
	BS00041911_51
	AX-158534553
	BobWhite_rep_c63956_254
	AX-158597291
	Kukri_c11120_462
	Tdurum_contig3182_132
	Tdurum_contig97351_247
	wsnp_Ex_c2171_4074003
	AX-158538980
	BobWhite_c42349_99
	IAAV8536
	BS00105409_51
	Ku_c3676_1280
	Excalibur_c35289_64
	AX-95022624
	AX-110557549
	BobWhite_c11539_336
	IAAV8190
	Excalibur_c74466_344
	AX-95094547
	AX-158555403
	RAC875_c2529_1483
	wsnp_Ku_c17659_26797674
	Ex_c67202_741
	Kukri_c26288_419
	AX-158555838
	AX-94407975
	BobWhite_c24718_225
	BS00030430_51
	Kukri_rep_c114738_144
	RAC875_c2044_170
	RAC875_c32792_231
	Tdurum_contig9132_102
	wsnp_BQ159467B_Ta_2_1
	CAP7_c3847_204
	BS00068469_51
	BS00015136_51
	wsnp_RFL_Contig4307_5006558
	AX-95154560
	Ku_c12469_837
	wsnp_Ex_c2920_5385184
	Kukri_c22553_60
	AX-158544024
	BS00022522_51
	BS00083578_51
	BS00022422_51
	Kukri_c44_1704
	AX-158557545
	AX-111094478
	AX-94554383
	wsnp_Ex_c21092_30220342
	BS00062967_51
	RAC875_c1638_165
	TGWA25K-TG0205
	AX-109856494
	AX-158521490
	BS00039749_51
	AX-158592717
	AX-158592724
	Kukri_c12901_706
	wsnp_Ex_c45195_51056617
	wsnp_Ku_c16895_25861847
	AX-95147740
	BS00099367_51
	Excalibur_c74397_238
	AX-109395546
	CAP7_c7065_166
	BS00023645_51
	IACX11401
	AX-158565048
	AX-158564840
	Excalibur_c15031_73
	Ra_c2110_494
	RAC875_c15649_1101
	AX-158544022
	BS00035533_51
	AX-111513035
	RAC875_rep_c105906_124
	RFL_Contig785_535
	Tdurum_contig52086_129
	Kukri_c67545_299
	AX-158526361
	wsnp_Ex_c51661_55533018
	wsnp_Ex_rep_c103248_88252281
	wsnp_Ex_rep_c69928_68889568
	wsnp_JD_c21530_18862705
	wsnp_Ku_rep_c71678_71421327
	BobWhite_c14915_156
	AX-110951890
	AX-109901444
	RAC875_c4108_2179
	RFL_Contig304_729
	wsnp_RFL_Contig3529_3696847
	GENE-0676_322
	TA001167-0831
	tplb0060e06_1793
	wsnp_JD_c16948_15934352
	wsnp_Ku_c850_1758318
	Excalibur_c21663_145
	AX-109326625
	wsnp_Ex_c1146_2200823
	BobWhite_c19945_341
	BS00011261_51
	AX-109979251
	GENE-2383_730
	Kukri_c3688_407
	wsnp_Ex_c63909_62932437
	wsnp_Ex_c63909_62932669
	wsnp_Ex_c63909_62932893
	wsnp_Ku_c3688_6797159
	AX-158563573
	AX-94796636
	AX-158540802
	AX-94702400
	BS00062843_51
	Kukri_rep_c104727_91
	RAC875_c13116_541
	wsnp_Ex_rep_c68113_66877517
	wsnp_Ex_c2887_5330426
	Kukri_c7169_105
	Kukri_rep_c68068_95
	BS00037006_51
	AX-111128855
	Tdurum_contig74972_652
	wsnp_Ku_c792_1636348
	AX-158527841
	wsnp_CAP11_rep_c8811_3803397
	AX-94542146
	wsnp_Ku_c16295_25149034
	AX-158553999
	TA001263-0453
	BS00010811_51
	RAC875_rep_c114561_587
	Tdurum_contig51717_1582
	Tdurum_contig28884_302
	AX-110390853
	AX-110503145
	Kukri_c2706_1424
	AX-158526462
	AX-158527592
	AX-158548273
	AX-94723934
	BS00010988_51
	BS00087427_51
	Ra_c3129_2015
	wsnp_Ra_c7615_13070849
	AX-158525404
	AX-94457721
	Excalibur_c7338_242
	Kukri_c11959_587
	Excalibur_rep_c111297_98
	AX-95631713
	AX-110020452
	BS00033372_51
	RAC875_c79857_301
	AX-111512776
	AX-158538484
	AX-158570571
	BobWhite_c20876_475
	BS00066466_51
	Excalibur_c37787_925
	RAC875_c3138_224
	RAC875_c50787_146
	RAC875_c86306_256
	BobWhite_c9138_101
	BS00004413_51
	AX-158540499
	TA003443-0646
	AX-94639168
	RFL_Contig5314_1147
	Kukri_c14877_303
	wsnp_Ex_c38849_46284348
	BS00066545_51
	wsnp_Ex_rep_c103248_88252209
	AX-94698036
	AX-158553983
	BobWhite_c41441_185
	Kukri_c100592_82
	AX-108787258
	AX-108897911
	AX-111089137
	AX-158558771
	AX-158565061
	BS00022495_51
	GENE-3439_205
	RAC875_c232_1895
	wsnp_Ra_c21347_30731133
	wsnp_Ex_c922_1775246
	Excalibur_c63885_115
	AX-158585662
	BS00072379_51
	AX-110029490
	AX-110040012
	AX-110063653
	AX-110368348
	AX-110545841
	AX-158560317
	AX-89588221
	AX-94465382
	AX-94480929
	AX-95233557
	BobWhite_c24457_126
	BS00021730_51
	BS00022201_51
	BS00041358_51
	BS00048887_51
	BS00064679_51
	BS00065146_51
	BS00090408_51
	BS00094681_51
	BS00102492_51
	CAP12_c6266_298
	CAP8_c806_297
	Excalibur_c20133_87
	Excalibur_c57766_92
	Excalibur_rep_c88290_94
	Kukri_rep_c115954_137
	Ra_c272_1632
	RAC875_c12808_182
	RAC875_c25799_457
	RAC875_c33300_141
	TA001772-0625
	wsnp_BE403956A_Ta_2_3
	wsnp_BE424246B_Ta_2_2
	wsnp_Ex_c10100_16600633
	wsnp_Ex_c21491_30636749
	wsnp_Ex_c21592_30743513
	wsnp_Ex_c34821_43076533
	wsnp_Ex_c3572_6531810
	wsnp_Ex_c3986_7217641
	wsnp_Ex_c44049_50205457
	wsnp_Ex_c44049_50205904
	wsnp_Ex_c5634_9906981
	wsnp_Ex_c5634_9907829
	wsnp_Ex_c6817_11761300
	wsnp_Ex_c8885_14842394
	wsnp_Ku_c17726_26872129
	BobWhite_c7145_355
	AX-94778471
	Kukri_c12562_453
	wsnp_Ex_c10644_17356566
	AX-109927092
	AX-158556339
	BS00023166_51
	Kukri_c35354_321
	AX-158556652
	AX-94542559
	BS00016654_51
	BS00010567_51
	Excalibur_c25414_806
	wsnp_RFL_Contig3522_3685860
	AX-158565069
	AX-158538990
	AX-94935613
	GENE-2326_353
	Kukri_c55909_1109
	RAC875_c1858_2693
	RAC875_c87052_193
	RAC875_rep_c102485_468
	TA001286-0611-w
	Tdurum_contig45965_563
	AX-94679138
	AX-94427458
	Tdurum_contig13245_119
	Tdurum_contig57324_104
	BS00022562_51
	Kukri_c542_1538
	AX-111079110
	AX-94417635
	IAAV8162
	wsnp_Ex_rep_c66982_65424063
	AX-158557774
	AX-95117727
	IAAV8446
	BobWhite_c41535_52
	BS00102828_51
	Kukri_c24148_254
	AX-89350924
	AX-94881376
	wsnp_Ex_c17452_26163465
	wsnp_Ex_rep_c67036_65492436
	wsnp_Ra_c8484_14372772
	RAC875_c25203_969
	Excalibur_c50934_159
	BS00073132_51
	AX-158608981
	AX-158618072
	TGWA25K-TG0214
	AX-108874073
	AX-109303197
	AX-158538040
	AX-158555703
	BS00045900_51
	AX-111577815
	AX-94899864
	BobWhite_c38340_243
	TA003665-0980
	TA004394-0527
	BS00022687_51
	AX-158556315
	Tdurum_contig74815_1274
	Tdurum_contig74815_1413
	AX-94914088
	wsnp_Ex_c18318_27140346
	RAC875_rep_c99492_65
	AX-94417303
	AX-94526208
	wsnp_Ra_rep_c74606_72470419
	wsnp_Ku_c51039_56457361
	AX-158606849
	BS00022902_51
	AX-94873939
	AX-158550809
	AX-158584512
	AX-94428612
	BS00081951_51
	Ex_c2332_275
	Kukri_c98858_299
	wsnp_Ex_rep_c105478_89891634
	Kukri_c49091_415
	CAP12_rep_c4571_181
	Ra_c109604_751
	TA001478-0609
	wsnp_Ex_c30689_39574415
	AX-158574911
	AX-95247247
	AX-158541582
	AX-94896508
	AX-86164634
	AX-94654729
	RAC875_c48107_65
	wsnp_Ku_c13952_22097895
	IAAV6234
	AX-89557934
	TGWA25K-TG0199
	BobWhite_c34233_205
	Excalibur_c90713_226
	BobWhite_c13400_608
	BS00064227_51
	wsnp_JD_c352_546108
	AX-158545078
	IACX11338
	AX-95108463
	AX-111516857
	Tdurum_contig42636_995
	AX-158559458
	AX-109475553
	IAAV4105
	RFL_Contig5758_757
	Tdurum_contig12941_1413
	BobWhite_c14966_231
	AX-94419462
	AX-95224021
	Kukri_c21818_519
	RAC875_rep_c78007_425
	wsnp_Ku_c21818_31604716
	wsnp_Ku_c4078_7436510
	wsnp_Ra_c39394_47110214
	BobWhite_c4646_119
	AX-158538155
	AX-158541173
	AX-158541179
	BS00022417_51
	BS00022949_51
	GENE-1196_146
	GENE-4359_102
	Kukri_c9387_112
	Ra_c2110_1660
	wsnp_BF202681B_Ta_2_2
	wsnp_Ku_c4507_8157580
	AX-158603119
	Tdurum_contig14986_191
	Tdurum_contig76709_195
	tplb0032g12_1241
	wsnp_RFL_Contig2805_2579582
	Tdurum_contig13879_352
	AX-109341038
	AX-158558079
	BS00089954_51
	BobWhite_c948_52
	Tdurum_contig11802_864
	BobWhite_c8266_582
	wsnp_BG604404B_Ta_2_1
	AX-94707625
	AX-94922494
	BS00095061_51
	wsnp_Ex_c19476_28434084
	AX-95229999
	Excalibur_c7338_563
	AX-111567165
	AX-94626492
	Tdurum_contig12159_468
	Excalibur_c8284_580
	BS00061979_51
	AX-158590627
	AX-108760176
	AX-108791745
	AX-86165887
	AX-95149116
	BobWhite_c1488_504
	BS00003866_51
	BS00084022_51
	CAP11_c6014_160
	Excalibur_c49588_76
	RAC875_c38417_246
	RAC875_c8515_653
	RAC875_c9833_297
	wsnp_Ex_c3906_7086162
	Tdurum_contig41912_893
	IAAV6180
	wsnp_Ex_c38326_45883440
	AX-158546026
	AX-158557761
	AX-94413327
	BobWhite_c10402_140
	AX-158570193
	AX-158605698
	AX-94414376
	AX-95164074
	BS00096719_51
	wsnp_Ex_c1440_2764867
	RAC875_rep_c73925_276
	AX-158521124
	BS00038643_51
	AX-158537529
	BS00078982_51
	Excalibur_c3762_715
	AX-110936094
	AX-94439758
	Kukri_c4074_463
	Kukri_c7804_2504
	TA003382-0407
	wsnp_Ex_c17127_25756019
	BobWhite_c20706_135
	BS00039489_51
	BobWhite_c16635_331
	AX-95208769
	RFL_Contig5450_993
	GENE-0014_317
	Kukri_c2408_857
	wsnp_Ra_c11211_18227610
	BobWhite_rep_c50671_356
	AX-94808669
	BS00079166_51
	tplb0060p09_735
	AX-109821362
	AX-95072534
	AX-158565192
	BS00099782_51
	Kukri_c37692_347
	RAC875_c8757_589
	wsnp_Ku_c12503_20174234
	Tdurum_contig50783_67
	RAC875_c583_391
	BS00063429_51
	BS00094057_51
	Kukri_c19883_365
	Kukri_c22513_1780
	AX-108940705
	AX-111643893
	AX-158598302
	BS00022122_51
	BS00043664_51
	BS00094710_51
	IACX3190
	Kukri_c4310_489
	RAC875_c11254_739
	TA002966-0294
	AX-158545011
	AX-95174986
	AX-95204890
	BS00012051_51
	AX-158528328
	AX-158573154
	RAC875_c34757_180
	Excalibur_rep_c111743_194
	RAC875_c20700_853
	AX-158523659
	AX-89381556
	Excalibur_c56240_176
	Kukri_c1308_2236
	wsnp_Ex_c1482_2835474
	AX-94912250
	AX-158521483
	AX-158570814
	Kukri_c5861_360
	wsnp_Ku_c16432_25320146
	AX-94417710
	AX-94760290
	wsnp_Ex_c3834_6971712
	AX-94726653
	BS00022176_51
	AX-95169625
	BS00070900_51
	Kukri_rep_c107323_210
	AX-158544026
	AX-158521229
	AX-158524870
	AX-158560897
	AX-94936410
	BS00022775_51
	wsnp_CAP8_c1013_646748
	AX-158526437
	AX-94612603
	CAP7_c11822_124
	RFL_Contig5898_1464
	RFL_Contig5898_807
	Excalibur_c18966_804
	Excalibur_c46000_203
	Tdurum_contig76960_213
	AX-158521426
	BS00066338_51
	AX-158540869
	AX-89706867
	BS00044274_51
	AX-94778887
	AX-111084543
	AX-158525923
	AX-158559346
	AX-158588985
	Tdurum_contig48049_705
	Tdurum_contig51613_821
	wsnp_CD454706B_Ta_1_1
	AX-108856741
	AX-110403928
	AX-111010677
	AX-111467329
	AX-89691394
	AX-89748301
	AX-94452286
	BobWhite_c11540_60
	wsnp_Ex_c19372_28313727
	wsnp_Ex_c2580_4800027
	AX-158593395
	AX-158536728
	AX-158541833
	Ra_c26970_1740
	Kukri_c58054_59
	AX-95202607
	tplb0056b15_858
	wsnp_CAP8_c334_304253
	AX-108744710
	BS00110564_51
	GENE-2278_444
	Excalibur_c25640_110
	Tdurum_contig51922_676
	AX-110009550
	AX-110958367
	Excalibur_c57603_523
	Kukri_rep_c101259_81
	RAC875_c19259_1902
	AX-158533554
	RFL_Contig5246_1091
	AX-94674935
	BS00073124_51
	AX-108749699
	Ex_c101666_634
	Excalibur_c60612_236
	Tdurum_contig11827_738
	Tdurum_contig98005_272
	AX-108775900
	AX-158539580
	AX-94474044
	Excalibur_c48448_279
	Ku_c203_584
	Kukri_rep_c72901_271
	Ra_c26852_560
	Tdurum_contig42423_1536
	Tdurum_contig42423_1963
	Tdurum_contig43954_2291
	RAC875_c37183_331
	BS00007437_51
	AX-94501544
	AX-94557244
	IAAV3806
	AX-95154820
	AX-94574485
	AX-94758742
	AX-95206509
	Kukri_c30643_112
	Kukri_c8405_1394
	wsnp_Ex_c17176_25816766
	BS00072156_51
	wsnp_Ex_c7280_12498193
	AX-158526078
	wsnp_Ku_c6464_11320381
	wsnp_BF474862A_Ta_2_1
	Jagger_rep_c10288_53
	AX-158558043
	Excalibur_c44487_642
	IAAV3791
	Tdurum_contig44139_1033
	wsnp_Ku_c23598_33524490
	AX-94433968
	TGWA25K-TG0290
	AX-158536729
	AX-158536736
	wsnp_JD_c1316_1891903
	Kukri_rep_c85389_715
	AX-158557796
	AX-94805521
	BS00064956_51
	RAC875_c36432_172
	Kukri_c12368_82
	Tdurum_contig45255_3473
	AX-111665196
	IAAV5819
	Kukri_c39981_381
	Kukri_c7495_824
	wsnp_Ex_c15325_23565935
	AX-158548186
	BS00023092_51
	BS00036878_51
	Excalibur_c56264_188
	wsnp_Ra_c7969_13600474
	IAAV1797
	RAC875_c6649_642
	BS00065264_51
	TA005284-0990
	AX-94629896
	AX-158565198
	BS00026916_51
	IAAV8042
	AX-94816599
	Ex_c19516_3687
	AX-94397938
	wsnp_Ku_c34980_44256215
	AX-158526927
	RAC875_c7630_1383
	AX-109832564
	Kukri_c28117_583
	AX-158567842
	Tdurum_contig28884_379
	AX-95157942
	wsnp_Ku_c12037_19549078
	AX-158548742
	AX-158561893
	Ex_c7593_754
	AX-158531993
	TA005615-0600
	RAC875_c68849_153
	wsnp_Ex_c56091_58346859
	Kukri_c49927_151
	CAP11_c1206_301
	Ex_c8482_488
	IAAV894
	IACX8190
	wsnp_Ku_rep_c68351_67302372
	Excalibur_c1845_4911
	AX-94588421
	Tdurum_contig67690_183
	CAP11_c5598_321
	Excalibur_c32735_603
	wsnp_BE442666A_Ta_2_1
	RAC875_c38003_164
	AX-158525667
	Excalibur_c38433_291
	IAAV475
	AX-158564625
	Excalibur_c14999_712
	AX-158567784
	Jagger_c2876_255
	AX-109865770
	AX-94448564
	AX-95258779
	wsnp_Ex_c6381_11093111
	wsnp_Ku_c10515_17368422
	Excalibur_c46399_307
	AX-94917376
	BS00022133_51
	wsnp_CAP11_c631_419930
	AX-94589700
	Excalibur_c18966_1008
	Kukri_c96922_98
	wsnp_Ex_c25104_34368562
	Ra_c64159_441
	AX-158626287
	BS00073125_51
	AX-95630766
	Kukri_c18017_1696
	Ra_c24793_726
	RAC875_c12993_127
	RAC875_c12993_201
	RAC875_c45115_509
	IACX6046
	wsnp_BE403818A_Ta_2_1
	AX-94496850
	RAC875_c3492_2195
	AX-158570494
	AX-110610231
	AX-94820753
	AX-94407210
	Ex_c2725_1442
	IAAV2366
	TA001473-0980
	TGWA25K-TG0313
	RAC875_c16993_196
	IAAV2002
	Tdurum_contig53340_953
	Kukri_rep_c70103_146
	BS00023200_51
	Tdurum_contig30451_88
	Tdurum_contig70639_196
	Tdurum_contig17697_675
	AX-158581587
	BobWhite_c30622_180
	Ku_c101932_436
	AX-94413096
	AX-110500701
	AX-158573942
	AX-108930776
	AX-158542981
	BS00099986_51
	Excalibur_c98205_83
	wsnp_JD_rep_c48755_32989025
	wsnp_JD_c1845_2564931
	BS00063744_51
	RAC875_c42206_305
	TGWA25K-TG0292
	wsnp_Ku_c663_1368085
	IACX3911
	Tdurum_contig49576_134
	Ku_c5969_1667
	Kukri_rep_c101316_375
	wsnp_Ex_c1269_2435294
	RAC875_rep_c91134_949
	wsnp_BG274584B_Ta_2_3
	Kukri_c52413_282
	Kukri_rep_c104879_103
	Tdurum_contig62941_85
	BobWhite_rep_c63332_67
	AX-108753174
	AX-158573311
	IAAV1677
	RAC875_c5744_115
	wsnp_JD_c18695_17091254
	AX-94432751
	AX-158598300
	IACX5800
	wsnp_Ex_c1149_2206471
	AX-158523146
	Tdurum_contig31139_79
	AX-110579601
	Tdurum_contig76559_124
	AX-94710242
	AX-158545828
	Ra_c71628_188
	AX-158604892
	wsnp_Ex_c2103_3947695
	Tdurum_contig56175_791
	Jagger_c9554_114
	wsnp_Ex_c16627_25162391
	IAAV7352
	BS00066039_51
	RFL_Contig3885_1183
	RFL_Contig622_1601
	AX-158565563
	AX-158538360
	Kukri_c49010_266
	Kukri_rep_c101529_1199
	AX-158598372
	AX-94993597
	AX-158526868
	GENE-1074_108
	AX-94721178
	AX-94393137
	AX-158585756
	wsnp_Ex_c3019_5578488
	BS00022505_51
	AX-158623698
	GENE-1724_72
	TA004478-0271
	Tdurum_contig15512_429
	BobWhite_c2022_245
	Tdurum_contig47550_699
	IAAV3315
	RAC875_c42866_1323
	AX-94416076
	RAC875_c29431_1849
	AX-158624695
	AX-158584816
	BobWhite_rep_c63940_205
	IAAV5564
	wsnp_Ex_c15490_23776560
	Excalibur_c15744_322
	BS00087279_51
	BobWhite_c40424_143
	AX-110943874
	AX-94558187
	AX-94385458
	AX-94619572
	AX-108740634
	AX-158566608
	AX-158590267
	Kukri_rep_c98227_230
	Tdurum_contig17062_221
	wsnp_Ku_c4296_7807837
	AX-94503507
	TA001426-0323
	AX-110535012
	AX-94608213
	BS00070091_51
	Tdurum_contig100787_79
	AX-89551965
	IAAV1382
	BS00049793_51
	BS00037462_51
	AX-94463677
	AX-158575334
	RAC875_c37837_889
	AX-158548038
	AX-108881562
	BS00082644_51
	BS00090945_51
	RAC875_c55214_932
	RAC875_rep_c72670_558
	TA004957-0405
	wsnp_Ex_c19454_28409258
	wsnp_Ex_c35545_43677576
	wsnp_Ku_c27273_37219950
	AX-108793870
	AX-89635156
	AX-95205468
	RAC875_c25339_200
	Excalibur_c1208_72
	AX-158567797
	Ku_c16895_793
	Kukri_c57593_79
	wsnp_Ex_rep_c103087_88123733
	Kukri_c8595_953
	RAC875_c67909_226
	AX-158565595
	GENE-3437_148
	AX-94936573
	Excalibur_c50999_269
	Excalibur_c50044_749
	AX-158538113
	Kukri_c9387_372
	RAC875_rep_c112008_519
	wsnp_CAP8_c630_456418
	BS00021739_51
	AX-95148023
	AX-110952216
	AX-110905579
	wsnp_Ex_c8741_14630167
	wsnp_JD_rep_c48797_33040150
	Tdurum_contig10677_529
	wsnp_BE498985A_Ta_2_1
	BobWhite_c47456_121
	AX-86168015
	BS00034554_51
	Ex_c13421_2094
	Excalibur_c581_947
	AX-108870310
	AX-158569338
	BS00083511_51
	RAC875_c35807_1110
	AX-158536737
	AX-110434009
	AX-158526387
	RFL_Contig487_1286
	AX-158623982
	Tdurum_contig92835_177
	AX-94626335
	AX-158566130
	Excalibur_c32711_504
	AX-94512819
	Excalibur_c46082_440
	GENE-3343_183
	GENE-4795_75
	wsnp_Ku_c3286_6111360
	Excalibur_c28938_185
	AX-158543703
	IAAV902
	wsnp_Ex_c36242_44232305
	BS00073411_51
	GENE-3318_556
	wsnp_Ku_rep_c76865_75281903
	RAC875_c22429_249
	wsnp_Ex_rep_c110196_92676847
	Excalibur_c7136_1260
	RFL_Contig2656_871
	Excalibur_c22768_963
	IACX5994
	wsnp_Ex_c33452_41938013
	wsnp_Ex_c33452_41938159
	BS00108055_51
	TA002215-1444
	RAC875_c37166_408
	Ex_c25733_348
	AX-158522037
	AX-94907881
	BobWhite_c1654_440
	Tdurum_contig62383_259
	AX-110446404
	AX-158575298
	AX-158587205
	AX-158542163
	AX-95260695
	Tdurum_contig13653_471
	AX-158572595
	Tdurum_contig8926_1118
	AX-94446956
	wsnp_Ex_c5296_9365847
	AX-108831659
	AX-111552047
	IAAV6423
	IAAV6689
	RAC875_c5913_172
	tplb0050m09_1890
	AX-94750793
	TA001855-0472
	AX-158548198
	wsnp_JD_c9360_10216330
	GENE-4208_229
	Kukri_rep_c70927_886
	TA004174-0504
	wsnp_Ex_c45213_51068305
	wsnp_Ra_c7280_12576178
	AX-94603425
	AX-158544988
	BS00104432_51
	AX-109875818
	AX-158537087
	AX-158603677
	AX-158543510
	wsnp_Ex_c17435_26144201
	Kukri_c4335_775
	AX-158577637
	Excalibur_c11079_923
	Tdurum_contig60189_310
	AX-94499961
	AX-158588349
	Jagger_c2853_75
	Tdurum_contig92819_647
	BS00022838_51
	RAC875_rep_c69785_196
	wsnp_Ex_rep_c66696_65023462
	AX-158523271
	AX-158550632
	AX-158584905
	RAC875_c23340_2243
	AX-109900018
	AX-86165910
	Kukri_rep_c72702_220
	Tdurum_contig13930_254
	BS00022836_51
	wsnp_JD_rep_c50820_34666611
	AX-158566530
	Kukri_c30847_344
	Tdurum_contig10362_328
	AX-158591222
	BS00039559_51
	BS00070643_51
	AX-158570103
	BobWhite_c16847_99
	wsnp_BE489326B_Ta_2_2
	Kukri_c31776_1621
	TA004132-0670
	IACX5982
	IACX3586
	wsnp_JD_c6160_7327405
	AX-109528142
	wsnp_Ra_c4321_7860456
	AX-109467010
	BS00035894_51
	AX-95080900
	wsnp_RFL_Contig2403_1927045
	AX-158538945
	Kukri_c75754_239
	AX-108726686
	AX-158533248
	AX-158578042
	AX-94451945
	AX-158541575
	AX-158548580
	wsnp_Ex_c16569_25082760
	tplb0036j13_718
	AX-94686079
	BS00011869_51
	RAC875_c89088_79
	AX-158566128
	AX-108865765
	BS00107795_51
	wsnp_Ex_c25505_34771897
	AX-158592226
	BobWhite_rep_c64944_264
	TGWA25K-TG0190
	Excalibur_c63243_434
	Kukri_rep_c98227_390
	RAC875_c36670_72
	Tdurum_contig30677_55
	Tdurum_contig85266_280
	CAP11_c1989_183
	AX-94559061
	Ex_c6479_750
	wsnp_Ex_c40019_47166796
	AX-158584893
	wsnp_JD_c10233_10936535
	AX-158558042
	RAC875_c18058_1070
	Excalibur_c31044_482
	AX-158534063
	AX-158548260
	AX-158578056
	Ku_c13637_545
	Kukri_rep_c103147_745
	AX-109854225
	Excalibur_rep_c102327_102
	IAAV3906
	JD_c32759_313
	Kukri_c57687_182
	wsnp_Ex_c10527_17198865
	wsnp_Ex_c1387_2659020
	wsnp_Ex_c14641_22698595
	wsnp_Ex_c27088_36309449
	wsnp_Ex_c3178_5868813
	wsnp_Ex_c4286_7734046
	wsnp_Ku_c46057_52907637
	wsnp_Ku_c7197_12439299
	BS00101401_51
	AX-158577307
	wsnp_Ex_c33765_42199371
	AX-111565410
	AX-158543643
	AX-158566905
	AX-95259896
	Ku_c5725_892
	AX-95189509
	BS00022072_51
	AX-109441689
	AX-111466791
	AX-158551104
	BobWhite_c19155_246
	BobWhite_c2715_411
	BS00066143_51
	Excalibur_c9846_1720
	Tdurum_contig59953_282
	AX-110981509
	Tdurum_contig26542_457
	AX-111564213
	AX-94789084
	RAC875_c9122_395
	AX-110918031
	AX-158574910
	AX-94420575
	AX-158557831
	AX-95200481
	BobWhite_c16847_343
	TA001218-0519
	RFL_Contig5031_526
	AX-94438244
	Excalibur_c5624_1026
	Kukri_c29142_1046
	Kukri_c29142_450
	Kukri_c29142_473
	Kukri_c29142_747
	Kukri_c34435_265
	Kukri_rep_c106490_583
	RAC875_c278_2934
	tplb0033c09_1345
	AX-158547366
	Kukri_c53810_137
	Kukri_c3866_1768
	Excalibur_rep_c105491_144
	BS00067590_51
	Kukri_c32307_481
	RAC875_c10650_90
	RAC875_rep_c116755_285
	IACX742
	Excalibur_c42110_210
	BS00089283_51
	Tdurum_contig33628_129
	AX-111639392
	AX-158536929
	BS00022541_51
	wsnp_Ku_c6065_10682531
	RFL_Contig5637_1008
	AX-109392359
	AX-95116218
	AX-89607200
	AX-94866977
	Excalibur_c7706_1936
	TA004649-0518
	RAC875_c46516_443
	Kukri_c56203_965
	AX-94516388
	BobWhite_c13210_115
	AX-94398361
	Kukri_rep_c71670_163
	wsnp_JD_c16245_15468917
	AX-94895395
	AX-95175890
	RAC875_c11652_544
	wsnp_BE489326B_Ta_2_1
	RAC875_c8714_1139
	wsnp_Ex_c24474_33721784
	Tdurum_contig8158_269
	BobWhite_c4014_508
	IAAV3903
	Excalibur_c11947_746
	BobWhite_s65298_124
	AX-94432058
	AX-95173841
	AX-109838796
	Kukri_rep_c108929_91
	wsnp_Ex_c5074_9009245
	AX-158596100
	Excalibur_c20439_825
	AX-158566169
	BS00040165_51
	BS00040166_51
	RAC875_c83401_115
	wsnp_Ex_c1996_3754394
	AX-158551014
	Kukri_c36879_83
	BS00082268_51
	BobWhite_c10832_1131
	Ra_c26319_331
	wsnp_Ex_c40732_47728890
	AX-158537263
	Ra_c104959_422
	IACX8602
	D_contig03023_692
	BS00065053_51
	RAC875_rep_c106400_276
	wsnp_Ku_c8765_14824678
	BS00089031_51
	AX-89462272
	AX-158589588
	TA002501-1291
	AX-94384331
	Excalibur_c41490_397
	RAC875_rep_c69917_755
	AX-158591523
	BS00041707_51
	Tdurum_contig13431_127
	AX-158543348
	AX-94815412
	AX-94854329
	wsnp_Ex_c25132_34396655
	AX-158553876
	AX-94730618
	AX-158555754
	AX-111459937
	Excalibur_c45861_189
	wsnp_Ra_c3766_6947263
	AX-158599772
	AX-94431524
	Tdurum_contig50984_599
	Excalibur_c80041_400
	CAP7_c4800_276
	RAC875_c64253_666
	BS00065292_51
	Ra_c956_2318
	AX-110469146
	AX-158526169
	AX-158565544
	AX-158565602
	AX-158585760
	AX-94478919
	AX-95153681
	BS00022520_51
	Excalibur_c79041_63
	GENE-0209_733
	IAAV5683
	IACX3059
	Jagger_c3991_101
	Ra_c10633_2155
	TA002629-0202
	wsnp_Ex_c18654_27528399
	wsnp_Ex_rep_c70120_69070056
	Excalibur_s107771_77
	BobWhite_c5396_296
	AX-94416605
	AX-108862241
	AX-111059525
	AX-94492007
	BobWhite_c12428_371
	BS00041742_51
	AX-110487164
	AX-158557731
	AX-89740997
	BS00084159_51
	Kukri_c63259_151
	BS00063686_51
	wsnp_Ex_c4125_7456528
	AX-158572606
	Kukri_c17417_291
	AX-95022227
	AX-158562253
	BS00088489_51
	BS00105315_51
	Ex_c24711_1153
	GENE-1125_32
	Tdurum_contig54925_202
	Tdurum_contig54925_415
	Ra_c11464_294
	RAC875_c12348_720
	TGWA25K-TG0203
	AX-108806404
	AX-158558376
	AX-158591367
	AX-94451125
	BS00020112_51
	wsnp_Ku_c35386_44598937
	AX-111501667
	AX-158542656
	AX-158585029
	wsnp_Ex_rep_c69647_68598463
	BS00088755_51
	Tdurum_contig62557_263
	AX-158532916
	TA005332-1378
	AX-158525891
	BS00022886_51
	wsnp_Ra_c10203_16850924
	Tdurum_contig9071_215
	AX-158547221
	BS00110128_51
	wsnp_Ex_rep_c102216_87433489
	AX-158525902
	Kukri_c87328_116
	AX-158584922
	BS00032146_51
	wsnp_Ex_c20529_29609310
	wsnp_Ex_c52405_56014689
	BS00110489_51
	Ku_c69113_923
	AX-109353677
	AX-110387060
	AX-111686258
	RAC875_rep_c92223_1022
	AX-95207913
	AX-109864951
	AX-158538914
	Tdurum_contig64587_107
	wsnp_JD_c30_49073
	AX-158621636
	AX-110382419
	Ku_c46571_2627
	wsnp_JD_c29407_23413291
	AX-158548656
	Kukri_c3338_271
	AX-158544034
	AX-95238524
	CAP8_c710_140
	RAC875_c63420_397
	Tdurum_contig82236_117
	AX-108789882
	AX-158577209
	RAC875_c25124_182
	tplb0028p02_562
	wsnp_Ex_rep_c66358_64543089
	AX-158550203
	Kukri_rep_c85536_598
	AX-158558671
	wsnp_Ku_c15214_23756800
	BobWhite_c42716_71
	BS00110231_51
	Excalibur_c40808_441
	Excalibur_rep_c72368_68
	RAC875_c47427_75
	RFL_Contig5937_1677
	wsnp_Ex_rep_c66255_64400455
	IACX9183
	AX-94717890
	CAP8_rep_c8022_270
	IACX3415
	AX-94437143
	AX-158556865
	wsnp_Ex_c6278_10941843
	wsnp_Ra_c6474_11298858
	Kukri_c5967_586
	BobWhite_c31163_694
	Tdurum_contig82404_354
	Kukri_c60564_136
	AX-94943216
	Tdurum_contig54860_1393
	wsnp_Ex_c51461_55394646
	AX-111545468
	AX-95091496
	BS00010179_51
	AX-158592638
	AX-94674756
	AX-111596716
	BS00066944_51
	TA005251-0278
	AX-111109389
	Tdurum_contig53038_684
	Tdurum_contig53038_714
	BS00063160_51
	TA004050-0253
	wsnp_CAP7_c1592_791887
	Tdurum_contig12459_405
	Tdurum_contig10108_246
	AX-158577230
	AX-111556733
	Excalibur_c878_1249
	Excalibur_rep_c77221_93
	AX-158600354
	AX-158560555
	AX-94428309
	BS00063296_51
	AX-158626812
	RFL_Contig6075_618
	wsnp_BE443187B_Ta_2_1
	AX-158542947
	GENE-0644_421
	AX-94684421
	BS00089968_51
	AX-158538215
	AX-110580885
	AX-158557658
	AX-95135748
	AX-158537076
	RAC875_c18668_513
	AX-95084761
	AX-158553443
	AX-94463626
	tplb0023b14_704
	wsnp_Ex_c946_1813956
	AX-158581324
	AX-94419507
	Tdurum_contig29033_75
	Tdurum_contig42729_433
	AX-94801818
	IAAV4125
	AX-158527194
	tplb0025i05_1836
	BS00068178_51
	Kukri_c14889_1086
	AX-110956320
	Ku_c10387_272
	IAAV7841
	AX-158586248
	AX-94515669
	BS00087043_51
	Excalibur_c56310_57
	AX-158559592
	RAC875_c16827_292
	Tdurum_contig12836_418
	AX-110958104
	AX-158562923
	RAC875_c14852_2171
	RAC875_c33564_120
	Ex_c898_1319
	wsnp_Ex_c898_1738424
	AX-94750198
	AX-110485532
	AX-111150471
	Kukri_rep_c89183_282
	TA003589-0518
	AX-109333618
	Tdurum_contig9144_222
	Tdurum_contig93328_869
	TGWA25K-TG0291
	Ra_c11023_679
	wsnp_Ex_c14031_21934322
	RFL_Contig5693_807
	Tdurum_contig9612_971
	BS00037094_51
	Tdurum_contig93710_409
	RAC875_c26400_88
	TA006276-0443
	wsnp_Ex_rep_c103497_88437811
	wsnp_Ex_rep_c68480_67305954
	AX-110417344
	AX-111589160
	BS00021895_51
	Kukri_c25839_487
	Kukri_c27717_316
	Kukri_c32885_145
	TA004365-0417
	GENE-1350_36
	Ra_c22880_760
	AX-94842402
	AX-158538218
	AX-158538236
	BS00081610_51
	Ex_c66357_866
	Kukri_c12079_204
	Tdurum_contig59585_656
	wsnp_CAP11_rep_c4226_1995152
	wsnp_Ex_rep_c66357_64540369
	wsnp_Ex_rep_c66357_64540428
	wsnp_Ra_c132_291198
	AX-158598968
	BS00075631_51
	AX-110558946
	AX-94971944
	wsnp_JD_c19278_17450210
	Kukri_c90676_212
	Ku_c12037_482
	Ra_c491_902
	AX-94945263
	JD_c3082_514
	AX-89541420
	AX-110503524
	AX-158542345
	AX-109866828
	GENE-0120_397
	AX-95142632
	Tdurum_contig47776_377
	Tdurum_contig59953_220
	AX-94538855
	AX-94705091
	AX-110974569
	Ku_c23207_988
	wsnp_CAP11_c323_263800
	AX-109901905
	AX-158552833
	AX-94740723
	Jagger_c555_287
	AX-95257656
	BobWhite_rep_c60245_107
	AX-108886825
	Excalibur_c15389_501
	AX-158555676
	BS00074780_51
	BS00107555_51
	Ex_c4847_236
	Excalibur_c4847_631
	Excalibur_c74304_642
	IACX636
	Tdurum_contig44062_733
	Tdurum_contig56511_144
	AX-158535318
	RAC875_c49136_59
	wsnp_Ex_rep_c66315_64480670
	GENE-3132_118
	BS00064654_51
	IAAV4514
	wsnp_Ra_c54050_57499377
	AX-158567176
	JD_c2026_3994
	Excalibur_c5416_846
	Ku_c71049_1180
	Tdurum_contig46583_2146
	AX-158529689
	AX-158535682
	Tdurum_contig75084_941
	Excalibur_rep_c107047_469
	AX-89572658
	RAC875_rep_c104791_336
	Excalibur_c47452_183
	Kukri_c28022_54
	IAAV4068
	IAAV8730
	AX-111476961
	BS00037278_51
	wsnp_Ku_c27759_37702654
	Kukri_c17962_570
	BS00091101_51
	Kukri_c31596_630
	Kukri_rep_c105330_552
	Kukri_rep_c75743_357
	RAC875_c7019_754
	RAC875_c81356_645
	RAC875_c81356_688
	wsnp_Ku_rep_c71755_71490557
	AX-158537078
	AX-86181093
	wsnp_CAP11_rep_c8708_3760250
	wsnp_Ex_c238_460841
	BS00045446_51
	BS00065390_51
	Tdurum_contig42962_2138
	TA004185-0581
	AX-158552203
	wsnp_Ex_c4826_8610827
	wsnp_JD_c10416_11077664
	AX-109862715
	AX-111616946
	wsnp_BE399939A_Ta_2_1
	Kukri_c53506_1141
	BS00033629_51
	AX-89424925
	Ex_c3838_1252
	wsnp_Ex_c3838_6980909
	Jagger_c7991_95
	AX-158542803
	RAC875_c101391_521
	wsnp_Ex_c21930_31102213
	IACX6241
	AX-95155738
	AX-94786026
	BS00063946_51
	Excalibur_c27023_134
	BobWhite_c4942_140
	AX-94685504
	Excalibur_c46453_144
	AX-158551562
	RAC875_c9523_328
	AX-111472995
	AX-89668177
	AX-158599821
	Kukri_c40204_617
	AX-110577975
	Kukri_c2164_1856
	AX-158547131
	BobWhite_rep_c64068_241
	BS00059503_51
	BobWhite_c8037_1135
	Jagger_c1432_289
	AX-110937882
	AX-94504714
	Tdurum_contig28828_664
	wsnp_JD_c2297_3138694
	AX-108928765
	AX-95185536
	wsnp_Ku_c17017_26019611
	AX-158527727
	IAAV7349
	AX-109962346
	wsnp_BG608232B_Ta_2_2
	AX-94765269
	BS00043286_51
	AX-94607423
	RAC875_rep_c114991_62
	AX-158542561
	AX-94723827
	Kukri_c49033_52
	AX-94635280
	RAC875_rep_c71561_619
	wsnp_Ex_c2352_4405961
	AX-94423840
	AX-109977653
	Ra_c2655_504
	AX-95240882
	Excalibur_c15844_1470
	AX-110060604
	AX-158525602
	GENE-1584_692
	Kukri_c17962_379
	BobWhite_c5095_634
	AX-158533529
	AX-158522631
	wsnp_JD_c7325_8422075
	AX-94483043
	AX-158583982
	AX-158564834
	BS00094342_51
	GENE-4277_295
	BobWhite_c11512_157
	BobWhite_c3392_749
	IACX1008
	AX-108815870
	BS00093895_51
	BS00010012_51
	AX-94479272
	RAC875_rep_c78007_394
	AX-158590367
	AX-94768083
	Kukri_c12910_908
	wsnp_Ex_c210_411604
	AX-158614912
	AX-158537853
	AX-158546534
	wsnp_Ex_c10838_17631243
	AX-94567799
	AX-158556159
	tplb0062a17_679
	wsnp_Ex_c2400_4498931
	tplb0045c06_1675
	AX-109906711
	GENE-0675_104
	Kukri_c4294_371
	Kukri_c97631_275
	Ra_c68109_376
	TA002269-1202
	wsnp_Ex_c2445_4573233
	AX-158567306
	AX-158567449
	Tdurum_contig51001_186
	Tdurum_contig5646_929
	RAC875_c8045_231
	Tdurum_contig45559_403
	AX-110464878
	RAC875_c1499_568
	RFL_Contig5787_2311
	AX-158534484
	AX-94388422
	TGWA25K-TG0233
	AX-109277512
	AX-158537210
	AX-158563487
	wsnp_Ex_c36937_44788679
	BS00081132_51
	AX-94633200
	AX-158578680
	Excalibur_c94139_55
	BS00023337_51
	AX-94872426
	AX-94833805
	BS00041232_51
	RAC875_rep_c112818_307
	AX-108882320
	wsnp_Ra_c9755_16200944
	Tdurum_contig13117_1316
	Tdurum_contig12722_779
	Kukri_c15912_2330
	Kukri_c15912_860
	AX-158543831
	AX-109433082
	AX-109331529
	AX-158555892
	wsnp_BG263758B_Ta_2_1
	Tdurum_contig17697_771
	wsnp_CAP11_c2142_1128735
	Kukri_c1214_2316
	AX-158582675
	Tdurum_contig62286_271
	wsnp_Ex_c46576_52042185
	wsnp_JD_c47318_32176833
	Excalibur_c44713_137
	AX-158558905
	AX-111130452
	AX-158565056
	AX-158584527
	BS00110075_51
	tplb0057g20_780
	AX-158599776
	Ra_c8939_653
	Tdurum_contig68343_339
	wsnp_Ku_c29780_39658445
	Tdurum_contig42140_871
	AX-110571065
	Tdurum_contig93283_513
	TA002095-0637
	Tdurum_contig28305_106
	AX-109963861
	AX-158559736
	BS00022202_51
	BS00077891_51
	AX-110515117
	CAP7_rep_c5636_102
	Ra_c4051_1010
	TA002671-0128-w
	wsnp_Ex_c24711_33964543
	RAC875_c31031_387
	wsnp_Ex_c11246_18191331
	IAAV7428
	AX-158548800
	AX-158561697
	AX-158558835
	BS00062939_51
	AX-158544997
	AX-158560814
	Tdurum_contig55429_116
	Tdurum_contig55429_147
	Excalibur_c57482_473
	AX-158542387
	Ku_c6791_519
	AX-109333268
	AX-110945767
	AX-158587973
	BobWhite_c23903_443
	Excalibur_c23777_74
	BS00027006_51
	wsnp_Ku_c13952_22097856
	AX-108843273
	IAAV51
	Tdurum_contig10426_280
	Tdurum_contig43263_243
	wsnp_Ex_c7967_13522958
[truncated: 1,870 more rows]
