# Supplementary material for: Harnessing genome-wide genetic diversity, population structure and linkage disequilibrium in Ethiopian durum wheat gene pool
Source: Front Plant Sci. 2023 Jul 20;14:1192356. doi: 10.3389/fpls.2023.1192356 (PMC10400094; doi:10.3389/fpls.2023.1192356)
Supplement: Supplementary file 7 [file Table_4.xlsx]

## Sheet: Sheet1
Supplementary Table 4. Eighty-five (85) selected loci revealing selection signatures from 8178 SNP markers based on the Fst distribution and threshold (Fst, P < 0.01).
marker name	CHr	POS	Obs. Het. BP	Obs FST	FST P-value	1-FST quantile
BS00067904_51	7A	22382623	0.155276	0.365675	0.000232459	0.999768
Excalibur_c2023_345	7A	11990871	0.330588	0.382127	4.32054e-38	1
Excalibur_c15578_73	5B	462440128	0.121568	0.389783	0.00799034	0.99201
JD_c1314_1184	7A	700726390	0.157916	0.394588	0.00227367	0.997726
TGWA25K-TG0264	5A	19875991	0.128371	0.401819	0.00708614	0.992914
wsnp_Ex_c807_1586396	5A	19875991	0.128371	0.401819	0.00708614	0.992914
BobWhite_c47608_273	2B	66943501	0.130112	0.417173	0.00678796	0.993212
AX-111694590	2B	656559207	0.146636	0.423071	0.00391513	0.996085
Tdurum_contig5691_596	2B	657824559	0.146636	0.423071	0.00391513	0.996085
Tdurum_contig42309_627	UPOS	0	0.142498	0.426332	0.00417377	0.995826
AX-109963861	1A	363487946	0.121697	0.431802	0.00922949	0.990771
Kukri_c12910_908	UPOS	0	0.120302	0.437648	0.00958384	0.990416
AX-94768083	5B	559926261	0.120302	0.437648	0.00958384	0.990416
wsnp_Ex_c210_411604	5B	567572763	0.120302	0.437648	0.00958384	0.990416
AX-158558372	4A	697224139	0.143651	0.438208	0.00412176	0.995878
AX-94465680	4B	84952930	0.14873	0.439518	0.00375521	0.996245
tplb0040b02_681	7B	719907662	0.131923	0.440086	0.00619533	0.993805
AX-109337198	6B	427388886	0.137568	0.441389	0.0043956	0.995604
Excalibur_rep_c71107_517	1B	640916599	0.164557	0.447576	0.00180069	0.998199
Tdurum_contig12204_384	4B	668850796	0.129461	0.447653	0.00729052	0.992709
BS00049942_51	6B	432620840	0.140583	0.447802	0.00437528	0.995625
BobWhite_c18566_106	6B	2064505	0.157012	0.455319	0.00293616	0.997064
wsnp_Ku_rep_c71785_71517370	UPOS	0	0.165103	0.456573	0.00171531	0.998285
Kukri_c6492_375	5A	529834873	0.159159	0.457757	0.00266756	0.997332
RAC875_rep_c83825_236	5A	450733793	0.129552	0.463267	0.00843639	0.991564
AX-94505411	7B	601935123	0.137711	0.463307	0.00523874	0.994761
BS00109052_51	5A	405164113	0.154221	0.464336	0.00333732	0.996663
wsnp_Ex_c807_1585614	5A	19874911	0.154732	0.467132	0.00335661	0.996643
AX-109993901	4A	687728265	0.136395	0.469866	0.00599297	0.994007
IAAV8081	7A	569305921	0.137032	0.472842	0.00629077	0.993709
RAC875_c38511_91	UPOS	0	0.146216	0.476779	0.00508115	0.994919
wsnp_Ra_c11651_18855691	6A	598708521	0.163202	0.477535	0.00285207	0.997148
AX-158627411	UPOS	0	0.132669	0.481293	0.00992969	0.99007
AX-158592255	7B	523618195	0.132669	0.481293	0.00992969	0.99007
BS00024065_51	7B	523648849	0.132669	0.481293	0.00992969	0.99007
Tdurum_contig28176_55	7B	528342963	0.132669	0.481293	0.00992969	0.99007
BS00059061_51	7B	530193424	0.132669	0.481293	0.00992969	0.99007
Ra_c10469_616	6B	196164921	0.201904	0.510328	4.98174e-05	0.99995
Tdurum_contig51993_52	3B	74286708	0.180495	0.510896	0.0021495	0.99785
AX-158523632	3A	726235077	0.178173	0.514968	0.00354403	0.996456
Kukri_rep_c101735_236	UPOS	0	0.298747	0.519752	6.80644e-10	1
Ku_c26872_269	3A	726229482	0.261987	0.523371	0.000143319	0.999857
AX-94685096	4B	30278570	0.19986	0.523845	0.000386277	0.999614
Ra_c4329_599	3B	589777194	0.231566	0.529164	0.000247834	0.999752
AX-94445910	3A	722511832	0.183313	0.53072	0.00358226	0.996418
AX-158538329	3B	589634814	0.183313	0.53072	0.00358226	0.996418
IAAV3838	3B	589295563	0.213651	0.531798	3.79311e-05	0.999962
wsnp_Ku_c13311_21255891	3B	589295563	0.213651	0.531798	3.79311e-05	0.999962
AX-158523697	3A	726186986	0.18498	0.533892	0.00354721	0.996453
AX-110615002	6A	599810412	0.187294	0.540332	0.00375786	0.996242
RAC875_c48687_681	6A	600054929	0.187294	0.540332	0.00375786	0.996242
Ku_c1083_375	UPOS	0	0.193246	0.541647	0.00246244	0.997538
Ku_c1083_1314	5B	479925855	0.193246	0.541647	0.00246244	0.997538
AX-158525556	5B	420440236	0.206855	0.545144	0.000360477	0.99964
Tdurum_contig11803_935	2A	35700685	0.225746	0.548084	0.00191966	0.99808
Tdurum_contig11803_306	2A	35701863	0.225746	0.548084	0.00191966	0.99808
AX-94385981	7A	21553035	0.180997	0.548679	0.00914074	0.990859
AX-109332949	4B	30654638	0.187158	0.553653	0.00763899	0.992361
IACX486	7B	618038035	0.192349	0.555779	0.00608502	0.993915
Tdurum_contig11803_850	2A	35700770	0.220047	0.566841	0.00586141	0.994139
wsnp_Ex_c3096_5709257	UPOS	0	0.227432	0.572457	0.00944003	0.99056
Excalibur_c3096_1699	3B	588921940	0.227432	0.572457	0.00944003	0.99056
wsnp_Ex_c3096_5709369	3B	588922162	0.227432	0.572457	0.00944003	0.99056
AX-95629008	3B	588922390	0.227432	0.572457	0.00944003	0.99056
AX-158535187	6B	644705042	0.219672	0.573093	0.00786142	0.992139
AX-158536918	UPOS	0	0.216666	0.579139	0.00928438	0.990716
Tdurum_contig11803_475	2A	35701694	0.216666	0.579139	0.00928438	0.990716
AX-94533854	2B	703056622	0.289421	0.581088	0.00607617	0.993924
Kukri_c53506_1141	6B	454883720	0.467521	0.899882	0.00799688	0.00799688
TA001494-0485	UPOS	0	0.499088	0.900144	0.00629241	0.00629241
Excalibur_c27023_134	2A	498880023	0.458499	0.902381	0.00691254	0.00691254
AX-108870310	2A	58050668	0.382433	0.903469	0.00807698	0.00807698
wsnp_BE497368A_Ta_2_1	5B	361065174	0.497425	0.907564	0.00357618	0.00357618
Kukri_c3338_271	5B	376561249	0.429305	0.908237	0.00356872	0.00356872
AX-108930776	5B	661528661	0.348786	0.910427	0.0100536	0.0100536
AX-158542981	5B	661647968	0.348786	0.910427	0.0100536	0.0100536
BS00099986_51	5B	662018223	0.348786	0.910427	0.0100536	0.0100536
AX-158555703	2A	57679847	0.362009	0.921976	0.00248599	0.00248599
AX-109303197	2A	57918765	0.362009	0.921976	0.00248599	0.00248599
AX-108874073	2A	57939542	0.362009	0.921976	0.00248599	0.00248599
AX-158540499	2A	743659936	0.337875	0.923299	0.00693583	0.00693583
AX-94999423	7B	680475733	0.249176	0.932059	0.00683096	0.00683096
AX-158538040	2A	57613299	0.362241	0.932211	0.000981222	0.000981222
BS00045900_51	2A	57614108	0.362241	0.932211	0.000981222	0.000981222
wsnp_Ku_c1307_2606226	3A	503580529	0.233823	0.953531	0.00234735	0.00234735
	UPOS = Unknown position, Chromosome (Chr), Physical positions (POS), observed heterozygosity (Obs. Het. BP), observed FST (Obs FST).
