# Supplementary material for: Harnessing genome-wide genetic diversity, population structure and linkage disequilibrium in Ethiopian durum wheat gene pool
Source: Front Plant Sci. 2023 Jul 20;14:1192356. doi: 10.3389/fpls.2023.1192356 (PMC10400094; doi:10.3389/fpls.2023.1192356)
Supplement: Supplementary file 8 [file Table_5.xlsx]

## Sheet: Sheet1
Supplementary Table 5. Lists of genes associated with 85 loci being under selection signatures from 8178 SNP markers based on the Fst distribution.
SNP name	Chromosome	Gene Name	Gene descriptions
AX-109963861	1A	TRITD1Av1G134900	UDP-N-acetylmuramoyl-L-alanyl-D-glutamate--2, 6-diaminopimelate ligase
		TRITD1Av1G134890	Expansin protein
		TRITD1Av1G134880	Kinase family protein
		TRITD1Av1G134920	Branched-chain-amino-acid aminotransferase
		TRITD1Av1G134940	Rop guanine nucleotide exchange factor, putative
		TRITD1Av1G134930	Phosphatidylinositol N-acetyglucosaminlytransferase subunit P-like protein
Excalibur_rep_c71107_517	1B	TRITD1Bv1G212200	Tesmin/TSO1-like CXC domain-containing protein
		TRITD1Bv1G212260	Tesmin/TSO1-like CXC domain-containing protein
		TRITD1Bv1G212250	Phosphate carrier protein, mitochondrial
		TRITD1Bv1G212390	Pentatricopeptide repeat-containing protein
		TRITD1Bv1G212460	Homeodomain transcriptional regulator
		TRITD1Bv1G212500	Werner Syndrome-like exonuclease
		TRITD1Bv1G211830	Cytochrome P450 family protein, expressed
Tdurum_contig11803_935	2A	TRITD2Av1G018730	Protein trichome birefringence
		TRITD2Av1G018770	Dof zinc finger protein
		TRITD2Av1G018830	Telomere repeat-binding factor like-protein
		TRITD2Av1G018880	methyl-coenzyme M reductase II subunit gamma, putative (DUF3741)
		TRITD2Av1G018890	Pectate lyase
		TRITD2Av1G018910	Actin cross-linking protein, putative (DUF569)
Tdurum_contig11803_306	2A	TRITD2Av1G018720	G-type lectin S-receptor-like Serine/Threonine-kinase G
		TRITD2Av1G018900	LITAF-domain-containing protein
Tdurum_contig11803_850	2A	Similar with above
Tdurum_contig11803_475	2A	Similar with above
AX-158538040	2A	TRITD2Av1G028380	F-box protein family
		TRITD2Av1G028400	B12D protein
		TRITD2Av1G028430	Thiamin pyrophosphokinase 1
		TRITD2Av1G028590	Peroxidase
BS00045900_51	2A	Similar with above
AX-158555703	2A	Similar with above
AX-109303197	2A	Similar with above
AX-108874073	2A	Similar with above
Excalibur_c27023_134	2A	TRITD2Av1G178520	Histone deacetylase
		TRITD2Av1G178540	Alkaline/neutral invertase
		TRITD2Av1G178550	Protein kinase
AX-158540499	2A	TRITD2Av1G279510	pesticidal crystal cry8Ba protein G
		TRITD2Av1G279520	Epoxide hydrolase 2
		TRITD2Av1G279530	MICOS complex subunit MIC60
		TRITD2Av1G279560	Phototropic-responsive NPH3 family protein
AX-108870310	2A	TRITD2Av1G028680	WEAK movement UNDER BLUE LIGHT-like protein
		TRITD2Av1G028700	Non-specific serine/threonine protein kinase
		TRITD2Av1G028720	Non-specific serine/threonine protein kinase
		TRITD2Av1G028770	Non-specific serine/threonine protein kinase
AX-111694590	2B	TRITD2Bv1G218500	Tetratricopeptide repeat (TPR)-like superfamily protein
		TRITD2Bv1G218560	AT hook motif DNA-binding family protein
		TRITD2Bv1G218580	Protease inhibitor/seed storage/lipid transfer family protein
		TRITD2Bv1G218450	Heavy metal-associated protein
Tdurum_contig5691_596	2B	TRITD2Bv1G218940	GTP cyclohydrolase 1 type 2 homolog G
		TRITD2Bv1G218960	dicer-like 2 G
		TRITD2Bv1G218970	Xyloglucan galactosyltransferase KATAMARI1-like protein
AX-94533854	2B	TRITD2Bv1G232280	Sister chromatid cohesion protein PDS5 homolog B-A
BobWhite_c47608_273	2B	TRITD2Bv1G029070	TPX2 (Targeting protein for Xklp2) family protein, putative G
		TRITD2Bv1G029080	F-box protein family-like
		TRITD2Bv1G029090	Translation initiation factor 2 subunit alpha
		TRITD2Bv1G029100	Heat shock transcription factor
Ku_c26872_269	3A	TRITD3Av1G277150	Syntaxin protein
		TRITD3Av1G277110	Progesterone 5-beta-reductase
		TRITD3Av1G277100	Progesterone 5-beta-reductase
		TRITD3Av1G277080	Progesterone 5-beta-reductase
AX-158523632	3A	TRITD3Av1G277270	Peroxidase
AX-158523697	3A	Similar with above
AX-94445910	3A	TRITD3Av1G274980	Polyubiquitin
		TRITD3Av1G275030	Polyubiquitin
		TRITD3Av1G275060	Polyubiquitin
		TRITD3Av1G275100	Polyubiquitin
		TRITD3Av1G275080	Polyubiquitin
wsnp_Ku_c1307_2606226	3A	TRITD3Av1G181000	E3 ubiquitin-protein ligase SDIR1 G
		TRITD3Av1G181010	ATP synthase protein I-related protein G
		TRITD3Av1G181020	Ubiquitin-conjugating enzyme E2
		TRITD3Av1G181030	Katanin p60 ATPase-containing subunit, putative
IAAV3838	3B	TRITD3Bv1G134050	Glucan endo-1,3-beta-glucosidase 1
		TRITD3Bv1G134110	Receptor-like protein kinase
		TRITD3Bv1G134190	Aspartic proteinase
		TRITD3Bv1G134180	multimeric translocon complex in the outer envelope membrane 132 G
wsnp_Ku_c13311_21255891	3B	Similar with above
Ra_c4329_599	3B	Similar with above
Tdurum_contig51993_52	3B	TRITD3Bv1G028390	30S ribosomal protein S7
		TRITD3Bv1G028380	bZIP transcription factor, putative (DUF1664)
		TRITD3Bv1G028330	Glutamate decarboxylase
		TRITD3Bv1G028260	Pentatricopeptide repeat-containing family protein
AX-158538329	3B	TRITD3Bv1G193230	2,3-bisphosphoglycerate-independent phosphoglycerate mutase
		TRITD3Bv1G193280	Dihydrolipoamide acetyltransferase component of pyruvate dehydrogenase complex
		TRITD3Bv1G193330	p-loop ntpase domain-containing protein lpa1-like 2 G
		TRITD3Bv1G193140	Carotenoid cleavage dioxygenase 7 G
Excalibur_c3096_1699	3B	TRITD3Bv1G192820	Pentatricopeptide repeat-containing protein
		TRITD3Bv1G192840	Auxin efflux carrier family protein-like
wsnp_Ex_c3096_5709369	3B	TRITD3Bv1G134050	Glucan endo-1,3-beta-glucosidase 1
		TRITD3Bv1G134110	Receptor-like protein kinase
AX-95629008	3B	Similar with above
		TRITD3Bv1G192970	Cytochrome P450 family protein, expressed
AX-158558372	4A	TRITD4Av1G248550	Kinase family protein
		TRITD4Av1G248630	F-box domain containing protein-like TE?
AX-109993901	4A	TRITD4Av1G244950	SPA1-related 3 G
		TRITD4Av1G245180	Leucine-rich repeat receptor-like kinase
		TRITD4Av1G245210	Cell cycle regulated microtubule associated protein
		TRITD4Av1G244930	Katanin p60 ATPase-containing subunit, putative
AX-94685096	4B	TRITD4Bv1G012700	Myosin-binding protein 2
		TRITD4Bv1G012610	3-oxo-5-alpha-steroid 4-dehydrogenase
		TRITD4Bv1G012660	Dystrobrevin alpha
		TRITD4Bv1G012690	ATP-dependent RNA helicase
AX-94465680	4B	TRITD4Bv1G029560	Protein transport protein SEC23
		TRITD4Bv1G029700	Pectin lyase-like superfamily protein
		TRITD4Bv1G029830	WAT1-related protein G
		TRITD4Bv1G029870	F-box family protein
		TRITD4Bv1G029620	Receptor-like kinase
Tdurum_contig12204_384	4B	TRITD4Bv1G203760	Leucine-rich repeat receptor-like protein kinase family protein
		TRITD4Bv1G203600	Divalent metal cation transporter MntH
		TRITD4Bv1G203420	Inner nuclear membrane Man1
		TRITD4Bv1G203460	CAAX protease self-immunity protein
AX-109332949	4B	TRITD4Bv1G012940	Protein kinase-like protein
		TRITD4Bv1G012840	Microsomal glutathione S-transferase 3
		TRITD4Bv1G012800	Microsomal glutathione S-transferase 3
		TRITD4Bv1G012970	Rho guanine nucleotide exchange factor 10 G
Kukri_c6492_375	5A	TRITD5Av1G196600	Zinc metalloprotease Rip1 G
		TRITD5Av1G196650	Protein kinase, putative
		TRITD5Av1G196630	receptor kinase 2
BS00109052_51	5A	TRITD5Av1G144880	NADH dehydrogenase-like complex L
		TRITD5Av1G144910	fold protein G
		TRITD5Av1G144960	Sulfate transporter, putative
		TRITD5Av1G144980	Chloroplast lysine N-methyltransferase
wsnp_Ex_c807_1585614	5A	TRITD5Av1G009760	N-carbamoylputrescine amidase
		TRITD5Av1G009770	Disease resistance protein
		TRITD5Av1G009780	Protein FANTASTIC FOUR 3
TGWA25K-TG0264	5A	TRITD5Av1G009760	N-carbamoylputrescine amidase
wsnp_Ex_c807_1586396	5A	TRITD5Av1G009700	Leucine-rich repeat receptor-like protein kinase family protein
		TRITD5Av1G009790	mechanosensitive channel of small conductance-like 9 G
RAC875_rep_c83825_236	5A	TRITD5Av1G164650	Type I inositol-1,4,5-trisphosphate 5-phosphatase
		TRITD5Av1G164660	DNA topoisomerase
		TRITD5Av1G164700	RADIALIS-like transcription factor
		TRITD5Av1G164710	RADIALIS-like transcription factor
AX-158525556	5B	TRITD5Bv1G140160	transcription factor, putative (Protein of unknown function, DUF547)
		TRITD5Bv1G140180	Protein MIZU-KUSSEI 1
		TRITD5Bv1G140240	Chaperone DnaJ-domain superfamily protein
Ku_c1083_1314	5B	TRITD5Bv1G162250	Sugar transporter ERD6
		TRITD5Bv1G162280	WD40 repeat-like protein
		TRITD5Bv1G162180	Disease resistance protein (TIR-NBS-LRR class) family
		TRITD5Bv1G162380	DNA-directed RNA polymerase subunit gamma
Excalibur_c15578_73	5B	TRITD5Bv1G155820	Peptidylprolyl isomerase
		TRITD5Bv1G155830	VWA domain containing protein G
		TRITD5Bv1G155840	Glucan endo-1,3-beta-glucosidase-like protein
		TRITD5Bv1G155770	60S ribosomal protein L32
AX-94768083	5B	TRITD5Bv1G196140	Cytochrome P450 family protein, expressed
		TRITD5Bv1G196150	Cytochrome P450 family protein, expressed
		TRITD5Bv1G196050	Basic helix-loop-helix (BHLH) family transcription factor
		TRITD5Bv1G196020	Disease resistance protein (NBS-LRR class) family
		TRITD5Bv1G195850	CWF19-like protein 2
		TRITD5Bv1G195860	ALA-interacting subunit 3
wsnp_Ex_c210_411604	5B	TRITD5Bv1G198930	Acyl-CoA N-acyltransferase with RING/FYVE/PHD-type zinc finger protein, putative
		TRITD5Bv1G198960	Myosin family protein, putative, expressed
		TRITD5Bv1G199060	Protein MIZU-KUSSEI 1
		TRITD5Bv1G198940	Photosystem II protein
Kukri_c3338_271	5B	TRITD5Bv1G126920	Protein GAMETE EXPRESSED 1 G
		TRITD5Bv1G126930	Cysteine protease
		TRITD5Bv1G126820	Rela/spot homolog 3 family protein
		TRITD5Bv1G127000	Kinase-like protein
wsnp_BE497368A_Ta_2_1	5B	TRITD5Bv1G121940	BAH-PHD domain-containing protein
		TRITD5Bv1G121960	AUGMIN subunit 5
		TRITD5Bv1G121970	ATP-dependent RNA helicase TE?
		TRITD5Bv1G122250	Protein elf4-like 4
AX-108930776	5B	TRITD5Bv1G235870	ATP-dependent RNA helicase
		TRITD5Bv1G235680	RING/FYVE/PHD zinc finger protein, putative
		TRITD5Bv1G235810	Glucuronoxylan 4-O-methyltransferase 1 G
AX-158542981	5B	similar with above
BS00099986_51	5B	TRITD5Bv1G235990	Transmembrane protein
		TRITD5Bv1G236000	Late embryogenesis abundant (LEA) hydroxyproline-rich glycoprotein family
		TRITD5Bv1G236040	SPX domain-containing family protein
		TRITD5Bv1G236130	F-box and associated interaction domains-containing protein
		TRITD5Bv1G236170	TPR domain containing protein
		TRITD5Bv1G236030	High affinity nitrate transporter
wsnp_Ra_c11651_18855691	6A	TRITD6Av1G218500	Receptor-kinase, putative
		TRITD6Av1G218560	Myb-like transcription factor family protein
		TRITD6Av1G218570	fanconi anemia group F protein (FANCF)
		TRITD6Av1G218630	Nicotinamide-nucleotide adenylyltransferase
		TRITD6Av1G218620	Glutathione S-transferase
		TRITD6Av1G218520	Zinc transporter 7 G
AX-110615002	6A	TRITD6Av1G219100	CLIP-associating protein-like
		TRITD6Av1G219120	NADH dehydrogenase [ubiquinone] 1 alpha subcomplex subunit 9, mitochondrial
		TRITD6Av1G219130	ABC1-like kinase
		TRITD6Av1G219110	Disease resistance protein RPM1
RAC875_c48687_681	6A	TRITD6Av1G219200	Alpha/beta-Hydrolases superfamily protein
		TRITD6Av1G219210	Glutathione S-transferase
		TRITD6Av1G219240	O-methyltransferase
		TRITD6Av1G219350	Serine/threonine-protein kinase
		TRITD6Av1G219450	Acetyl-coenzyme A synthetase
Ra_c10469_616	6B	TRITD6Bv1G067420	Calcium-transporting ATPase
		TRITD6Bv1G067380	Aldose 1-epimerase family protein
		TRITD6Bv1G067410	Centrosomal protein of 76 kDa G
		TRITD6Bv1G067560	Regulator of chromosome condensation (RCC1) family protein
BobWhite_c18566_106	6B	TRITD6Bv1G003930	Cytosine-specific methyltransferase
		TRITD6Bv1G003990	Mitochondrial transcription termination factor-like
		TRITD6Bv1G003960	Mitochondrial transcription termination factor-like
		TRITD6Bv1G004030	Mitochondrial transcription termination factor-like
BS00049942_51	6B	TRITD6Bv1G132630	GDSL esterase/lipase G
		TRITD6Bv1G132650	Polyribonucleotide nucleotidyltransferase
AX-109337198	6B	TRITD6Bv1G131420	Leucine-rich repeat (LRR) family protein
		TRITD6Bv1G131470	Ubiquitin carboxyl-terminal hydrolase, putative
		TRITD6Bv1G131550	Leucine-rich repeat (LRR) family protein
AX-158535187	6B	TRITD6Bv1G207840	Transmembrane protein 184C
		TRITD6Bv1G207750	Receptor-like protein kinase
		TRITD6Bv1G207930	WD repeat-containing protein 3
		TRITD6Bv1G207990	Plasma membrane ATPase
		TRITD6Bv1G207940	Translation initiation factor IF-2, putative isoform 2 G
Kukri_c53506_1141	6B	TRITD6Bv1G138770	MYB transcription factor 1
		TRITD6Bv1G138850	Methyltransferase
		TRITD6Bv1G138860	Remorin
		TRITD6Bv1G138890	Shortage in chiasmata G
Excalibur_c2023_345	7A	TRITD7Av1G007140	Cellulose synthase
BS00067904_51	7A	TRITD7Av1G012510	Aspartic proteinase nepenthesin-2
		TRITD7Av1G012590	Aspartic proteinase nepenthesin-2
		TRITD7Av1G012650	transmembrane protein, putative (DUF594)
		TRITD7Av1G012530	Late embryogenesis abundant protein G
JD_c1314_1184	7A	TRITD7Av1G269130	Disease resistance protein (TIR-NBS-LRR class) family
		TRITD7Av1G269140	Calcium-dependent lipid-binding domain-containing protein
		TRITD7Av1G269160	Germin-like protein
		TRITD7Av1G269170	E3 ubiquitin-protein ligase MARCH6 G
		TRITD7Av1G269180	BTB/POZ and MATH domain-containing protein 4
IAAV8081	7A	TRITD7Av1G212820	Processing peptidase
		TRITD7Av1G212830	TMV response-related protein G
		TRITD7Av1G213000	PLATZ transcription factor family protein
		TRITD7Av1G212970	TMV response-related protein
AX-94385981	7A	TRITD7Av1G012260	ATP-dependent Clp protease ATP-binding subunit
		TRITD7Av1G012200	Calcium-binding protein
		TRITD7Av1G012160	ATP-dependent Clp protease ATP-binding subunit
AX-94505411	7B	TRITD7Bv1G192230	Serine/threonine-protein kinase
		TRITD7Bv1G192240	DNA repair family protein
		TRITD7Bv1G192330	ATP-dependent Clp protease ATP-binding subunit
		TRITD7Bv1G192340	Serine/threonine-protein kinase
		TRITD7Bv1G192310	DUF4408 domain protein
IACX486	7B	TRITD7Bv1G197220	Glutathione S-transferase
		TRITD7Bv1G197250	SAUR-like auxin-responsive protein family
		TRITD7Bv1G197260	SAUR-like auxin-responsive protein family
		TRITD7Bv1G197270	MADS box transcription factor G
tplb0040b02_681	7B	TRITD7Bv1G232200	Fatty acyl-CoA reductase
		TRITD7Bv1G232220	Peptidoglycan-binding LysM domain protein, putative
		TRITD7Bv1G232210	sulfate transporter 1 2 G
		TRITD7Bv1G232230	tRNA dimethylallyltransferase
		TRITD7Bv1G232250	Disease resistance protein
AX-158592255	7B	TRITD7Bv1G165470	ATP-dependent helicase/nuclease subunit TE?
		TRITD7Bv1G165480	Protein N-terminal asparagine amidohydrolase
		TRITD7Bv1G165520	Zinc finger CCCH domain-containing protein
		TRITD7Bv1G165540	Non-structural maintenance of chromosome element 4
BS00024065_51	7B	Similar with above
Tdurum_contig28176_55	7B	TRITD7Bv1G166720	Pentatricopeptide repeat-containing family protein
		TRITD7Bv1G166730	DUF1680 domain protein
		TRITD7Bv1G166740	DUF1680 domain protein
		TRITD7Bv1G166750	DUF1680 domain protein
BS00059061_51	7B	TRITD7Bv1G167370	Pectin lyase-like superfamily protein
		TRITD7Bv1G167400	Pentatricopeptide repeat-containing protein
		TRITD7Bv1G167410	Protein IQ-DOMAIN 1
		TRITD7Bv1G167420	Microtubule associated family protein
AX-94999423	7B	TRITD7Bv1G218380	Telomere repeat-binding factor like-protein
		TRITD7Bv1G218390	Methyltransferase-like
		TRITD7Bv1G218470	Methyl-CpG-binding domain-containing protein 13 G
