# Supplementary material for: Harnessing genome-wide genetic diversity, population structure and linkage disequilibrium in Ethiopian durum wheat gene pool
Source: Front Plant Sci. 2023 Jul 20;14:1192356. doi: 10.3389/fpls.2023.1192356 (PMC10400094; doi:10.3389/fpls.2023.1192356)
Supplement: Supplementary file 9 [file Table_6.xlsx]

## Sheet: Sheet1
Supplementary Table 6. The FST-based pairwise genetic differentiation of all pairs of durum wheat populations used in this study and the P-value table for pairwise Fst is located below the matrix table.
EH1	0
NSH1	0.52113	0
WSH1	0.56542	0.34364	0
WSH3	0.45413	0.76868	0.78029	0
WH	0.51407	0.89925	0.93174	0.6769	0
WGM1	0.63607	0.89789	0.91207	0.62175	0.84525	0
WGM2	0.68894	0.94834	0.96679	0.75201	0.91227	0.87483	0
WSH2	0.60024	0.91946	0.97608	0.81162	0.94274	0.92095	0.97357	0
AR1	0.62901	0.89827	0.91099	0.66375	0.80027	0.81337	0.85493	0.91653	0
BL1	0.49376	0.78771	0.79725	0.36086	0.67609	0.66597	0.73084	0.82254	0.64059	0
NSH2	0.65247	0.94155	0.96375	0.77552	0.8956	0.88969	0.94246	0.97151	0.85625	0.75715	0
NG1	0.43422	0.89283	0.93921	0.78746	0.90196	0.89661	0.9515	0.95283	0.89811	0.7948	0.94386	0
NG2	0.54205	0.86994	0.88946	0.53673	0.78342	0.77464	0.85287	0.90845	0.7289	0.47459	0.85827	0.87852	0
ESH1	0.62644	0.9443	0.96643	0.67058	0.87412	0.85092	0.91157	0.97533	0.6447	0.63311	0.91787	0.94786	0.76888	0
WSH4	0.74584	0.97583	0.99346	0.69365	0.96285	0.89277	0.97128	0.99977	0.90208	0.74099	0.97814	0.9798	0.87982	0.97132	0
NW	0.51029	0.81076	0.82035	0.3837	0.70038	0.70091	0.7657	0.83788	0.66659	0.37979	0.79322	0.81269	0.53267	0.65542	0.77217	0
BL2	0.47767	0.01573	0.28497	0.71772	0.84011	0.86556	0.91613	0.84267	0.86395	0.74267	0.90322	0.83404	0.82047	0.90317	0.94811	0.76504	0
NO	0.60599	0.92881	0.95532	0.77205	0.03977	0.89196	0.93907	0.96337	0.84821	0.7648	0.92665	0.93143	0.85313	0.91906	0.97653	0.78747	0.88341	0
JM	0.32336	0.80112	0.84057	0.62405	0.76141	0.80401	0.87949	0.86805	0.79227	0.64004	0.83236	0.79893	0.73885	0.8272	0.92282	0.66202	0.73872	0.83637	0
NG3	0.37151	0.70043	0.72013	0.54451	0.62655	0.71367	0.74871	0.71835	0.68458	0.564	0.70963	0.67353	0.62072	0.68198	0.80617	0.55962	0.65449	0.7014	0.54517	0
EH2	0.50142	0.95357	0.98774	0.72048	0.89997	0.88288	0.95507	0.99982	0.86743	0.72161	0.95599	0.9612	0.85125	0.95391	0.9998	0.74487	0.90025	0.94133	0.82169	0.58102	0
ESH2	0.51281	0.91045	0.94574	0.69777	0.01594	0.86499	0.92692	0.95763	0.819	0.69452	0.91226	0.91094	0.80381	0.89766	0.97437	0.71825	0.84977	-0.00509	0.77544	0.63149	0.92754	0
NSH3	0.52452	0.8974	0.96856	0.74417	0.91813	0.89818	0.96549	0	0.89261	0.76176	0.96284	0.9394	0.87083	0.9643	0.99977	0.77756	0.80175	0.95231	0.81683	0.65667	0.99986	0.93908	0
SM	0.66647	0.96412	0.98791	0.69021	0.92995	0.86648	0.95268	0.99713	0.80701	0.65218	0.96065	0.97131	0.834	0.92797	0.99631	0.71218	0.92503	0.95873	0.8767	0.74072	0.99524	0.94974	0.99589	0
WSH5	0.61425	0.95829	0.98858	0.7369	0.91677	0.88742	0.95964	0.99959	0.85675	0.71807	0	0.96382	0.85219	0.94696	0.99964	0.75942	0.91039	0.95117	0.82691	0.6788	0.9996	0.9404	0.99953	0.99461	0
WSH6	0.52455	0.89731	0.96842	0.74414	0.91806	0.89815	0.96545	0.21532	0.89259	0.76174	0.96279	0.93932	0.87078	0.96423	0.99972	0.77753	0.8017	0.95225	0.81678	0.65668	0.99977	0.939	0.18824	0.99583	0.99944	0
WSH7	0.48963	0.88242	0.91951	0.69447	0.84748	0.84896	0.92066	0.92148	0.85317	0.70629	0.88828	0.88354	0.81238	0.9041	0.96197	0.72412	0.82242	0.90067	0.7642	0.62623	0.91754	0.866	0.89069	0.93703	0.90563	0.8906	0
NSH4	0.53175	0.94204	0.98491	0.73502	0.90805	0.88687	0.95775	0.99971	0.87825	0.73579	0.9535	0.95045	0.85878	0.95842	0.9998	0.76525	0.87715	0.94635	0.83121	0.64496	0.99997	0.93256	0.99975	0.99558	0.99955	0.99963	0.87223	0
ESH3	0.56503	0.95054	0.9868	0.73717	0.06027	0.89248	0.95945	0.99961	0.85534	0.73098	0.95429	0.95716	0.85122	0.95178	0.99971	0.75753	0.89325	0	0.83407	0.67109	0.99967	0.00094	0.99957	0.995	0.99933	0.99947	0.91881	0.99967	0
NSH5	0.43005	0.81329	0.83169	0.57908	0.64224	0.75583	0.80122	0.82752	0.61813	0.55443	0.74136	0.79319	0.64138	0.65831	0.86954	0.58593	0.76206	0.72915	0.63665	0.53824	0.72979	0.65676	0.77135	0.7734	0.72287	0.77133	0.72343	0.73716	0.71528	0
NSH6	0.64602	0.91414	0.92883	0.68233	0.83194	0.83461	0.87972	0.93493	0.51822	0.66655	0.86922	0.91595	0.76836	0.67871	0.92819	0.685	0.87888	0.87723	0.80154	0.69583	0.89905	0.85041	0.91292	0.85604	0.87418	0.91289	0.87153	0.90378	0.8889	0.65429	0
TG1	0.53357	0.8587	0.8804	0.56531	0.61981	0.79122	0.8379	0.8895	0.7474	0.49829	0.84659	0.86301	0.66273	0.77814	0.89211	0.56069	0.80922	0.7205	0.73083	0.62072	0.81091	0.64835	0.84792	0.82975	0.83929	0.84788	0.79559	0.8298	0.71031	0.63059	0.78012	0
NSH7	0.54062	0.90065	0.9297	0.71263	0.02506	0.8619	0.91402	0.93821	0.80776	0.70827	0.89434	0.90139	0.80227	0.87813	0.96062	0.73174	0.84761	0.00884	0.77947	0.64666	0.89711	-0.00489	0.91612	0.92899	0.91398	0.91606	0.85761	0.90545	0.02661	0.65136	0.83973	0.64979	0
NSH8	0.69536	0.96911	0.99162	0.66974	0.94138	0.88018	0.96172	0.9998	0.85849	0.64056	0.96772	0.97541	0.8086	0.95619	0.99957	0.69502	0.9328	0.96536	0.89529	0.75048	0.99986	0.95965	0.9998	0.99377	0.99958	0.99974	0.9468	0.99986	0.99968	0.81479	0.89568	0.8285	0.94001	0
EH3	0.4556	0.76785	0.77763	0.50381	0.63878	0.72087	0.74986	0.76617	0.60264	0.54713	0.70106	0.7582	0.63129	0.6523	0.789	0.56145	0.72613	0.71246	0.59049	0.5348	0.69813	0.65342	0.7113	0.71534	0.67415	0.7113	0.68088	0.69328	0.69127	0.47967	0.59846	0.61912	0.65355	0.73771	0
AR2	0.63552	0.91287	0.92819	0.66904	0.82737	0.83189	0.87836	0.93442	0.50371	0.65732	0.86867	0.91509	0.7609	0.675	0.9267	0.67825	0.87651	0.87385	0.79838	0.68991	0.89669	0.8465	0.91226	0.85047	0.87463	0.91222	0.86928	0.9027	0.88666	0.63991	0.08784	0.77315	0.8345	0.89409	0.57178	0
AR3	0.51267	0.82973	0.83982	0.49471	0.67532	0.71761	0.76212	0.84891	0.35123	0.46883	0.74756	0.83046	0.57841	0.44618	0.82355	0.49454	0.7842	0.76299	0.65181	0.57621	0.75824	0.69802	0.79178	0.6667	0.71354	0.79174	0.74701	0.77072	0.7412	0.47915	0.06264	0.60919	0.70243	0.73832	0.45647	0.09603	0
NSH9	0.51459	0.83529	0.84885	0.43056	0.71304	0.71593	0.77935	0.86635	0.61526	0.32931	0.79642	0.8402	0.49836	0.63356	0.81282	0.44156	0.7879	0.79828	0.67962	0.59259	0.77552	0.73531	0.81455	0.7112	0.77027	0.81452	0.75646	0.8006	0.77838	0.57059	0.63875	0.54419	0.74089	0.68044	0.54146	0.62452	0.39721	0
SW1	0.44356	0.77587	0.7888	0.3868	0.65676	0.6557	0.72862	0.80785	0.62468	0.39619	0.72679	0.78717	0.49667	0.63612	0.75097	0.42494	0.7246	0.75113	0.61587	0.53935	0.69462	0.67884	0.74343	0.6665	0.68718	0.74341	0.68033	0.72304	0.71866	0.53315	0.64631	0.55037	0.68947	0.62588	0.50005	0.6374	0.45814	0.36176	0
SW2	0.34667	0.7303	0.75042	0.44907	0.63872	0.68162	0.77404	0.74627	0.69141	0.51999	0.73362	0.71298	0.60422	0.70139	0.81036	0.51902	0.67021	0.74232	0.53703	0.47969	0.67197	0.65636	0.66401	0.7299	0.69324	0.66399	0.58366	0.66226	0.70556	0.5305	0.70089	0.60843	0.67301	0.756	0.50043	0.69413	0.53807	0.54078	0.38296	0
EGM	0.60171	0.89696	0.91386	0.56236	0.85808	0.78491	0.889	0.9277	0.81224	0.62935	0.90429	0.89805	0.77558	0.85956	0.89432	0.66097	0.85906	0.90118	0.79904	0.69744	0.89293	0.87262	0.90347	0.87222	0.90531	0.90343	0.85627	0.8997	0.9052	0.76134	0.83623	0.78208	0.86951	0.89369	0.68925	0.83112	0.70575	0.69671	0.63835	0.62897	0
AR4	0.62877	0.8861	0.89932	0.64735	0.81199	0.79985	0.87543	0.91098	0.80052	0.65407	0.87711	0.8887	0.75157	0.82407	0.90954	0.66336	0.84874	0.87285	0.76446	0.68896	0.86981	0.82777	0.87424	0.85542	0.86382	0.87417	0.83532	0.86746	0.86239	0.71408	0.80356	0.7583	0.8313	0.88097	0.71112	0.80669	0.62377	0.69479	0.66123	0.66364	0.81421	0
WSH8	0.35712	0.68535	0.70728	0.47864	0.60418	0.68372	0.75918	0.71963	0.6988	0.51962	0.72702	0.68166	0.60013	0.6998	0.80839	0.52481	0.625	0.71233	0.52114	0.4783	0.64635	0.61841	0.63246	0.7171	0.6802	0.63242	0.55867	0.62443	0.66492	0.52319	0.70369	0.59168	0.64244	0.74486	0.53686	0.69984	0.54315	0.55322	0.4649	0.29053	0.67369	0.58073	0
WSH9	0.68685	0.85989	0.86772	0.69732	0.81674	0.81803	0.86229	0.87846	0.84186	0.7146	0.87148	0.86875	0.79741	0.84581	0.89452	0.72003	0.83181	0.86654	0.77972	0.71619	0.84408	0.82617	0.84023	0.85656	0.85239	0.8402	0.81174	0.84552	0.8481	0.77364	0.84022	0.7873	0.83521	0.87133	0.7606	0.84267	0.75101	0.75981	0.72205	0.69904	0.8171	0.72677	0.60364	0
SW3	0.39289	0.8574	0.90647	0.72801	0.86949	0.8694	0.93227	0.90258	0.87385	0.75617	0.91859	0.82164	0.8417	0.92385	0.96481	0.77496	0.79231	0.91107	0.73202	0.62806	0.92956	0.88223	0.87106	0.94794	0.93394	0.87097	0.80055	0.91066	0.92974	0.7713	0.89016	0.83002	0.87475	0.95339	0.70466	0.88868	0.78697	0.79563	0.7183	0.60284	0.86862	0.85439	0.55644	0.83703	0
TG2	0.42382	0.81959	0.85928	0.66538	0.79266	0.82721	0.89226	0.85359	0.8278	0.68997	0.86551	0.80776	0.77591	0.86687	0.93129	0.69617	0.75817	0.8556	0.67946	0.57793	0.85382	0.80502	0.80416	0.89927	0.86631	0.80411	0.71351	0.8121	0.85832	0.68558	0.84467	0.75099	0.80629	0.9122	0.64564	0.8402	0.72457	0.73818	0.6646	0.52316	0.81745	0.80616	0.52054	0.79641	0.70842	0
MC	0.61171	0.7154	0.71557	0.60682	0.68809	0.68624	0.72685	0.7251	0.72241	0.62803	0.7337	0.72538	0.68334	0.71151	0.74607	0.62569	0.69806	0.73057	0.66045	0.62852	0.70486	0.69433	0.69088	0.71383	0.71037	0.69084	0.68151	0.70141	0.70746	0.66794	0.71112	0.67817	0.7051	0.72875	0.6671	0.71675	0.64376	0.65948	0.63095	0.60868	0.68827	0.55713	0.53514	0.30251	0.69587	0.67365	0
	EH1	NSH1	WSH1	WSH3	WH	WGM1	WGM2	WSH2	AR1	BL1	NSH2	NG1	NG2	ESH1	WSH4	NW	BL2	NO	JM	NG3	EH2	ESH2	NSH3	SM	WSH5	WSH6	WSH7	NSH4	ESH3	NSH5	NSH6	TG1	NSH7	NSH8	EH3	AR2	AR3	NSH9	SW1	SW2	EGM	AR4	WSH8	WSH9	SW3	TG2	MC
EH1	*
NSH1	0.00000+-0.0000	*
WSH1	0.00000+-0.0000	0.00000+-0.0000	*
WSH3	0.00000+-0.0000	0.00000+-0.0000	0.00000+-0.0000	*
WH	0.00000+-0.0000	0.00000+-0.0000	0.00000+-0.0000	0.00000+-0.0000	*
WGM1	0.00000+-0.0000	0.00000+-0.0000	0.00000+-0.0000	0.00000+-0.0000	0.00000+-0.0000	*
WGM2	0.00000+-0.0000	0.00000+-0.0000	0.00000+-0.0000	0.00000+-0.0000	0.00000+-0.0000	0.00000+-0.0000	*
WSH2	0.00000+-0.0000	0.00000+-0.0000	0.00000+-0.0000	0.00000+-0.0000	0.00000+-0.0000	0.00000+-0.0000	0.00000+-0.0000	*
AR1	0.00000+-0.0000	0.00000+-0.0000	0.00000+-0.0000	0.00000+-0.0000	0.00000+-0.0000	0.00000+-0.0000	0.00000+-0.0000	0.00000+-0.0000	*
BL1	0.00000+-0.0000	0.00000+-0.0000	0.00000+-0.0000	0.00000+-0.0000	0.00000+-0.0000	0.00000+-0.0000	0.00000+-0.0000	0.00000+-0.0000	0.00000+-0.0000	*
NSH2	0.00000+-0.0000	0.00000+-0.0000	0.00000+-0.0000	0.00000+-0.0000	0.00000+-0.0000	0.00000+-0.0000	0.00000+-0.0000	0.00000+-0.0000	0.00000+-0.0000	0.00000+-0.0000	*
NG1	0.00000+-0.0000	0.00000+-0.0000	0.00000+-0.0000	0.00000+-0.0000	0.00000+-0.0000	0.00000+-0.0000	0.00000+-0.0000	0.00000+-0.0000	0.00000+-0.0000	0.00000+-0.0000	0.00000+-0.0000	*
NG2	0.00000+-0.0000	0.00000+-0.0000	0.00000+-0.0000	0.00000+-0.0000	0.00000+-0.0000	0.00000+-0.0000	0.00000+-0.0000	0.00000+-0.0000	0.00000+-0.0000	0.00000+-0.0000	0.00000+-0.0000	0.00000+-0.0000	*
ESH1	0.00000+-0.0000	0.00000+-0.0000	0.00000+-0.0000	0.00000+-0.0000	0.00000+-0.0000	0.00000+-0.0000	0.00000+-0.0000	0.00000+-0.0000	0.00000+-0.0000	0.00000+-0.0000	0.00000+-0.0000	0.00000+-0.0000	0.00000+-0.0000	*
WSH4	0.00000+-0.0000	0.00000+-0.0000	0.00000+-0.0000	0.00000+-0.0000	0.00000+-0.0000	0.00000+-0.0000	0.00000+-0.0000	0.00000+-0.0000	0.00000+-0.0000	0.00000+-0.0000	0.00000+-0.0000	0.00000+-0.0000	0.00000+-0.0000	0.00000+-0.0000	*
NW	0.00000+-0.0000	0.00000+-0.0000	0.00000+-0.0000	0.00000+-0.0000	0.00000+-0.0000	0.00000+-0.0000	0.00000+-0.0000	0.00000+-0.0000	0.00000+-0.0000	0.00000+-0.0000	0.00000+-0.0000	0.00000+-0.0000	0.00000+-0.0000	0.00000+-0.0000	0.00000+-0.0000	*
BL2	0.00000+-0.0000	0.65766+-0.0430	0.00000+-0.0000	0.00000+-0.0000	0.00000+-0.0000	0.00000+-0.0000	0.00000+-0.0000	0.00000+-0.0000	0.00000+-0.0000	0.00000+-0.0000	0.00000+-0.0000	0.00000+-0.0000	0.00000+-0.0000	0.00000+-0.0000	0.00000+-0.0000	0.00000+-0.0000	*
NO	0.00000+-0.0000	0.00000+-0.0000	0.00000+-0.0000	0.00000+-0.0000	0.39640+-0.0493	0.00000+-0.0000	0.00000+-0.0000	0.00000+-0.0000	0.00000+-0.0000	0.00000+-0.0000	0.00000+-0.0000	0.00000+-0.0000	0.00000+-0.0000	0.00000+-0.0000	0.00000+-0.0000	0.00000+-0.0000	0.00000+-0.0000	*
JM	0.00000+-0.0000	0.00000+-0.0000	0.00000+-0.0000	0.00000+-0.0000	0.00000+-0.0000	0.00000+-0.0000	0.00000+-0.0000	0.00000+-0.0000	0.00000+-0.0000	0.00000+-0.0000	0.00000+-0.0000	0.00000+-0.0000	0.00000+-0.0000	0.00000+-0.0000	0.00000+-0.0000	0.00000+-0.0000	0.00000+-0.0000	0.00000+-0.0000	*
NG3	0.00000+-0.0000	0.00000+-0.0000	0.00000+-0.0000	0.00000+-0.0000	0.00000+-0.0000	0.00000+-0.0000	0.00000+-0.0000	0.00000+-0.0000	0.00000+-0.0000	0.00000+-0.0000	0.00000+-0.0000	0.00000+-0.0000	0.00000+-0.0000	0.00000+-0.0000	0.00000+-0.0000	0.00000+-0.0000	0.00000+-0.0000	0.00000+-0.0000	0.00000+-0.0000	*
EH2	0.00000+-0.0000	0.00000+-0.0000	0.00000+-0.0000	0.00000+-0.0000	0.00000+-0.0000	0.00000+-0.0000	0.00000+-0.0000	0.00000+-0.0000	0.00000+-0.0000	0.00000+-0.0000	0.00000+-0.0000	0.00000+-0.0000	0.00000+-0.0000	0.00000+-0.0000	0.00000+-0.0000	0.00000+-0.0000	0.00000+-0.0000	0.00000+-0.0000	0.00000+-0.0000	0.00000+-0.0000	*
ESH2	0.00000+-0.0000	0.00000+-0.0000	0.00000+-0.0000	0.00000+-0.0000	0.99099+-0.0030	0.00000+-0.0000	0.00000+-0.0000	0.00000+-0.0000	0.00000+-0.0000	0.00000+-0.0000	0.00000+-0.0000	0.00000+-0.0000	0.00000+-0.0000	0.00000+-0.0000	0.00000+-0.0000	0.00000+-0.0000	0.00000+-0.0000	0.53153+-0.0417	0.00000+-0.0000	0.00000+-0.0000	0.00000+-0.0000	*
NSH3	0.00000+-0.0000	0.00000+-0.0000	0.00000+-0.0000	0.00000+-0.0000	0.00000+-0.0000	0.00000+-0.0000	0.00000+-0.0000	0.23423+-0.0609	0.00000+-0.0000	0.00000+-0.0000	0.00000+-0.0000	0.00000+-0.0000	0.00000+-0.0000	0.00000+-0.0000	0.00000+-0.0000	0.00000+-0.0000	0.00000+-0.0000	0.00000+-0.0000	0.00000+-0.0000	0.00000+-0.0000	0.00000+-0.0000	0.00000+-0.0000	*
SM	0.00000+-0.0000	0.00000+-0.0000	0.00000+-0.0000	0.00000+-0.0000	0.00000+-0.0000	0.00000+-0.0000	0.00000+-0.0000	0.00000+-0.0000	0.00000+-0.0000	0.00000+-0.0000	0.00000+-0.0000	0.00000+-0.0000	0.00000+-0.0000	0.00000+-0.0000	0.00000+-0.0000	0.00000+-0.0000	0.00000+-0.0000	0.00000+-0.0000	0.00000+-0.0000	0.00000+-0.0000	0.00000+-0.0000	0.00000+-0.0000	0.00000+-0.0000	*
WSH5	0.00000+-0.0000	0.00000+-0.0000	0.00000+-0.0000	0.00000+-0.0000	0.00000+-0.0000	0.00000+-0.0000	0.00000+-0.0000	0.00000+-0.0000	0.00000+-0.0000	0.00000+-0.0000	0.99099+-0.0030	0.00000+-0.0000	0.00000+-0.0000	0.00000+-0.0000	0.00000+-0.0000	0.00000+-0.0000	0.00000+-0.0000	0.00000+-0.0000	0.00000+-0.0000	0.00000+-0.0000	0.00000+-0.0000	0.00000+-0.0000	0.00000+-0.0000	0.00000+-0.0000	*
WSH6	0.00000+-0.0000	0.00000+-0.0000	0.00000+-0.0000	0.00000+-0.0000	0.00000+-0.0000	0.00000+-0.0000	0.00000+-0.0000	0.00000+-0.0000	0.00000+-0.0000	0.00000+-0.0000	0.00000+-0.0000	0.00000+-0.0000	0.00000+-0.0000	0.00000+-0.0000	0.00000+-0.0000	0.00000+-0.0000	0.00000+-0.0000	0.00000+-0.0000	0.00000+-0.0000	0.00000+-0.0000	0.00000+-0.0000	0.00000+-0.0000	0.00000+-0.0000	0.00000+-0.0000	0.00000+-0.0000	*
WSH7	0.00000+-0.0000	0.00000+-0.0000	0.00000+-0.0000	0.00000+-0.0000	0.00000+-0.0000	0.00000+-0.0000	0.00000+-0.0000	0.00000+-0.0000	0.00000+-0.0000	0.00000+-0.0000	0.00000+-0.0000	0.00000+-0.0000	0.00000+-0.0000	0.00000+-0.0000	0.00000+-0.0000	0.00000+-0.0000	0.00000+-0.0000	0.00000+-0.0000	0.00000+-0.0000	0.00000+-0.0000	0.00000+-0.0000	0.00000+-0.0000	0.00000+-0.0000	0.00000+-0.0000	0.00000+-0.0000	0.00000+-0.0000	*
NSH4	0.00000+-0.0000	0.00000+-0.0000	0.00000+-0.0000	0.00000+-0.0000	0.00000+-0.0000	0.00000+-0.0000	0.00000+-0.0000	0.00000+-0.0000	0.00000+-0.0000	0.00000+-0.0000	0.00000+-0.0000	0.00000+-0.0000	0.00000+-0.0000	0.00000+-0.0000	0.00000+-0.0000	0.00000+-0.0000	0.00000+-0.0000	0.00000+-0.0000	0.00000+-0.0000	0.00000+-0.0000	0.00000+-0.0000	0.00000+-0.0000	0.00000+-0.0000	0.00000+-0.0000	0.00000+-0.0000	0.00000+-0.0000	0.00000+-0.0000	*
ESH3	0.00000+-0.0000	0.00000+-0.0000	0.00000+-0.0000	0.00000+-0.0000	0.99099+-0.0030	0.00000+-0.0000	0.00000+-0.0000	0.00000+-0.0000	0.00000+-0.0000	0.00000+-0.0000	0.00000+-0.0000	0.00000+-0.0000	0.00000+-0.0000	0.00000+-0.0000	0.00000+-0.0000	0.00000+-0.0000	0.00000+-0.0000	0.99099+-0.0030	0.00000+-0.0000	0.00000+-0.0000	0.00000+-0.0000	0.99099+-0.0030	0.00000+-0.0000	0.00000+-0.0000	0.00000+-0.0000	0.00000+-0.0000	0.00000+-0.0000	0.00000+-0.0000	*
NSH5	0.00000+-0.0000	0.00000+-0.0000	0.00000+-0.0000	0.00000+-0.0000	0.00000+-0.0000	0.00000+-0.0000	0.00000+-0.0000	0.00000+-0.0000	0.00000+-0.0000	0.00000+-0.0000	0.00000+-0.0000	0.00000+-0.0000	0.00000+-0.0000	0.00000+-0.0000	0.00000+-0.0000	0.00000+-0.0000	0.00000+-0.0000	0.00000+-0.0000	0.00000+-0.0000	0.00000+-0.0000	0.00000+-0.0000	0.00000+-0.0000	0.00000+-0.0000	0.00000+-0.0000	0.00000+-0.0000	0.00000+-0.0000	0.00000+-0.0000	0.00000+-0.0000	0.00000+-0.0000	*
NSH6	0.00000+-0.0000	0.00000+-0.0000	0.00000+-0.0000	0.00000+-0.0000	0.00000+-0.0000	0.00000+-0.0000	0.00000+-0.0000	0.00000+-0.0000	0.00000+-0.0000	0.00000+-0.0000	0.00000+-0.0000	0.00000+-0.0000	0.00000+-0.0000	0.00000+-0.0000	0.00000+-0.0000	0.00000+-0.0000	0.00000+-0.0000	0.00000+-0.0000	0.00000+-0.0000	0.00000+-0.0000	0.00000+-0.0000	0.00000+-0.0000	0.00000+-0.0000	0.00000+-0.0000	0.00000+-0.0000	0.00000+-0.0000	0.00000+-0.0000	0.00000+-0.0000	0.00000+-0.0000	0.00000+-0.0000	*
TG1	0.00000+-0.0000	0.00000+-0.0000	0.00000+-0.0000	0.00000+-0.0000	0.00000+-0.0000	0.00000+-0.0000	0.00000+-0.0000	0.00000+-0.0000	0.00000+-0.0000	0.00000+-0.0000	0.00000+-0.0000	0.00000+-0.0000	0.00000+-0.0000	0.00000+-0.0000	0.00000+-0.0000	0.00000+-0.0000	0.00000+-0.0000	0.00000+-0.0000	0.00000+-0.0000	0.00000+-0.0000	0.00000+-0.0000	0.00000+-0.0000	0.00000+-0.0000	0.00000+-0.0000	0.00000+-0.0000	0.00000+-0.0000	0.00000+-0.0000	0.00000+-0.0000	0.00000+-0.0000	0.00000+-0.0000	0.00000+-0.0000	*
NSH7	0.00000+-0.0000	0.00000+-0.0000	0.00000+-0.0000	0.00000+-0.0000	0.86486+-0.0279	0.00000+-0.0000	0.00000+-0.0000	0.00000+-0.0000	0.00000+-0.0000	0.00000+-0.0000	0.00000+-0.0000	0.00000+-0.0000	0.00000+-0.0000	0.00000+-0.0000	0.00000+-0.0000	0.00000+-0.0000	0.00000+-0.0000	0.73874+-0.0265	0.00000+-0.0000	0.00000+-0.0000	0.00000+-0.0000	0.99099+-0.0030	0.00000+-0.0000	0.00000+-0.0000	0.00000+-0.0000	0.00000+-0.0000	0.00000+-0.0000	0.00000+-0.0000	0.99099+-0.0030	0.00000+-0.0000	0.00000+-0.0000	0.00000+-0.0000	*
NSH8	0.00000+-0.0000	0.00000+-0.0000	0.00000+-0.0000	0.00000+-0.0000	0.00000+-0.0000	0.00000+-0.0000	0.00000+-0.0000	0.00000+-0.0000	0.00000+-0.0000	0.00000+-0.0000	0.00000+-0.0000	0.00000+-0.0000	0.00000+-0.0000	0.00000+-0.0000	0.00000+-0.0000	0.00000+-0.0000	0.00000+-0.0000	0.00000+-0.0000	0.00000+-0.0000	0.00000+-0.0000	0.00000+-0.0000	0.00000+-0.0000	0.00000+-0.0000	0.00000+-0.0000	0.00000+-0.0000	0.00000+-0.0000	0.00000+-0.0000	0.00000+-0.0000	0.00000+-0.0000	0.00000+-0.0000	0.00000+-0.0000	0.00000+-0.0000	0.00000+-0.0000	*
EH3	0.00000+-0.0000	0.00000+-0.0000	0.00000+-0.0000	0.00000+-0.0000	0.00000+-0.0000	0.00000+-0.0000	0.00000+-0.0000	0.00000+-0.0000	0.00000+-0.0000	0.00000+-0.0000	0.00000+-0.0000	0.00000+-0.0000	0.00000+-0.0000	0.00000+-0.0000	0.00000+-0.0000	0.00000+-0.0000	0.00000+-0.0000	0.00000+-0.0000	0.00000+-0.0000	0.00000+-0.0000	0.00000+-0.0000	0.00000+-0.0000	0.00000+-0.0000	0.00000+-0.0000	0.00000+-0.0000	0.00000+-0.0000	0.00000+-0.0000	0.00000+-0.0000	0.00000+-0.0000	0.00000+-0.0000	0.00000+-0.0000	0.00000+-0.0000	0.00000+-0.0000	0.00000+-0.0000	*
AR2	0.00000+-0.0000	0.00000+-0.0000	0.00000+-0.0000	0.00000+-0.0000	0.00000+-0.0000	0.00000+-0.0000	0.00000+-0.0000	0.00000+-0.0000	0.00000+-0.0000	0.00000+-0.0000	0.00000+-0.0000	0.00000+-0.0000	0.00000+-0.0000	0.00000+-0.0000	0.00000+-0.0000	0.00000+-0.0000	0.00000+-0.0000	0.00000+-0.0000	0.00000+-0.0000	0.00000+-0.0000	0.00000+-0.0000	0.00000+-0.0000	0.00000+-0.0000	0.00000+-0.0000	0.00000+-0.0000	0.00000+-0.0000	0.00000+-0.0000	0.00000+-0.0000	0.00000+-0.0000	0.00000+-0.0000	0.00000+-0.0000	0.00000+-0.0000	0.00000+-0.0000	0.00000+-0.0000	0.00000+-0.0000	*
AR3	0.00000+-0.0000	0.00000+-0.0000	0.00000+-0.0000	0.00000+-0.0000	0.00000+-0.0000	0.00000+-0.0000	0.00000+-0.0000	0.00000+-0.0000	0.00000+-0.0000	0.00000+-0.0000	0.00000+-0.0000	0.00000+-0.0000	0.00000+-0.0000	0.00000+-0.0000	0.00000+-0.0000	0.00000+-0.0000	0.00000+-0.0000	0.00000+-0.0000	0.00901+-0.0091	0.00000+-0.0000	0.00000+-0.0000	0.00000+-0.0000	0.00000+-0.0000	0.00000+-0.0000	0.00000+-0.0000	0.00000+-0.0000	0.00000+-0.0000	0.00000+-0.0000	0.00000+-0.0000	0.00000+-0.0000	0.38739+-0.0408	0.00000+-0.0000	0.00000+-0.0000	0.00000+-0.0000	0.00000+-0.0000	0.09009+-0.0271	*
NSH9	0.00000+-0.0000	0.00000+-0.0000	0.00000+-0.0000	0.00000+-0.0000	0.00000+-0.0000	0.00000+-0.0000	0.00000+-0.0000	0.00000+-0.0000	0.00000+-0.0000	0.00000+-0.0000	0.00000+-0.0000	0.00000+-0.0000	0.00000+-0.0000	0.00000+-0.0000	0.00000+-0.0000	0.00000+-0.0000	0.00000+-0.0000	0.00000+-0.0000	0.00000+-0.0000	0.00000+-0.0000	0.00000+-0.0000	0.00000+-0.0000	0.00000+-0.0000	0.00000+-0.0000	0.00000+-0.0000	0.00000+-0.0000	0.00000+-0.0000	0.00000+-0.0000	0.00000+-0.0000	0.00000+-0.0000	0.00000+-0.0000	0.00000+-0.0000	0.00000+-0.0000	0.00000+-0.0000	0.00000+-0.0000	0.00000+-0.0000	0.00901+-0.0091	*
SW1	0.00000+-0.0000	0.00000+-0.0000	0.00000+-0.0000	0.00000+-0.0000	0.00000+-0.0000	0.00000+-0.0000	0.00000+-0.0000	0.00000+-0.0000	0.00000+-0.0000	0.00000+-0.0000	0.00000+-0.0000	0.00000+-0.0000	0.00000+-0.0000	0.00000+-0.0000	0.00000+-0.0000	0.00000+-0.0000	0.00000+-0.0000	0.00000+-0.0000	0.00000+-0.0000	0.00000+-0.0000	0.00000+-0.0000	0.00000+-0.0000	0.00000+-0.0000	0.00000+-0.0000	0.00000+-0.0000	0.00000+-0.0000	0.00000+-0.0000	0.00000+-0.0000	0.00000+-0.0000	0.00901+-0.0091	0.00000+-0.0000	0.00000+-0.0000	0.00000+-0.0000	0.00000+-0.0000	0.00000+-0.0000	0.00000+-0.0000	0.00000+-0.0000	0.00901+-0.0091	*
SW2	0.00000+-0.0000	0.00000+-0.0000	0.00000+-0.0000	0.00901+-0.0091	0.00000+-0.0000	0.00000+-0.0000	0.00000+-0.0000	0.00000+-0.0000	0.00000+-0.0000	0.00000+-0.0000	0.00000+-0.0000	0.00000+-0.0000	0.00000+-0.0000	0.00000+-0.0000	0.00000+-0.0000	0.00000+-0.0000	0.00000+-0.0000	0.00000+-0.0000	0.00000+-0.0000	0.00000+-0.0000	0.00000+-0.0000	0.00000+-0.0000	0.00000+-0.0000	0.00000+-0.0000	0.00000+-0.0000	0.00000+-0.0000	0.00000+-0.0000	0.00000+-0.0000	0.00000+-0.0000	0.00000+-0.0000	0.00000+-0.0000	0.00000+-0.0000	0.00000+-0.0000	0.00000+-0.0000	0.00000+-0.0000	0.00000+-0.0000	0.00000+-0.0000	0.00000+-0.0000	0.01802+-0.0121	*
EGM	0.00000+-0.0000	0.00000+-0.0000	0.00000+-0.0000	0.00000+-0.0000	0.00000+-0.0000	0.00000+-0.0000	0.00000+-0.0000	0.00000+-0.0000	0.00000+-0.0000	0.00000+-0.0000	0.00000+-0.0000	0.00000+-0.0000	0.00000+-0.0000	0.00000+-0.0000	0.00000+-0.0000	0.00000+-0.0000	0.00000+-0.0000	0.00000+-0.0000	0.00000+-0.0000	0.00000+-0.0000	0.00000+-0.0000	0.00000+-0.0000	0.00000+-0.0000	0.00000+-0.0000	0.00000+-0.0000	0.00000+-0.0000	0.00000+-0.0000	0.00000+-0.0000	0.00000+-0.0000	0.00000+-0.0000	0.00000+-0.0000	0.00000+-0.0000	0.00000+-0.0000	0.00000+-0.0000	0.00000+-0.0000	0.00000+-0.0000	0.00000+-0.0000	0.00000+-0.0000	0.00000+-0.0000	0.00000+-0.0000	*
AR4	0.00000+-0.0000	0.00000+-0.0000	0.00000+-0.0000	0.00000+-0.0000	0.00000+-0.0000	0.00000+-0.0000	0.00000+-0.0000	0.00000+-0.0000	0.00000+-0.0000	0.00000+-0.0000	0.00000+-0.0000	0.00000+-0.0000	0.00000+-0.0000	0.00000+-0.0000	0.00000+-0.0000	0.00000+-0.0000	0.00000+-0.0000	0.00000+-0.0000	0.00000+-0.0000	0.00000+-0.0000	0.00000+-0.0000	0.00000+-0.0000	0.00000+-0.0000	0.00000+-0.0000	0.00000+-0.0000	0.00000+-0.0000	0.00000+-0.0000	0.00000+-0.0000	0.00000+-0.0000	0.00000+-0.0000	0.00000+-0.0000	0.00000+-0.0000	0.00000+-0.0000	0.00000+-0.0000	0.00000+-0.0000	0.00000+-0.0000	0.00000+-0.0000	0.00000+-0.0000	0.00000+-0.0000	0.00000+-0.0000	0.00000+-0.0000	*
WSH8	0.00000+-0.0000	0.00000+-0.0000	0.00000+-0.0000	0.00000+-0.0000	0.00000+-0.0000	0.00000+-0.0000	0.00000+-0.0000	0.00000+-0.0000	0.00000+-0.0000	0.00000+-0.0000	0.00000+-0.0000	0.00000+-0.0000	0.00000+-0.0000	0.00000+-0.0000	0.00000+-0.0000	0.00000+-0.0000	0.00000+-0.0000	0.00000+-0.0000	0.00000+-0.0000	0.00000+-0.0000	0.00000+-0.0000	0.00000+-0.0000	0.00000+-0.0000	0.00000+-0.0000	0.00000+-0.0000	0.00000+-0.0000	0.00000+-0.0000	0.00000+-0.0000	0.00000+-0.0000	0.00000+-0.0000	0.00000+-0.0000	0.00000+-0.0000	0.00000+-0.0000	0.00000+-0.0000	0.00000+-0.0000	0.00000+-0.0000	0.00000+-0.0000	0.00000+-0.0000	0.00000+-0.0000	0.00000+-0.0000	0.00000+-0.0000	0.00901+-0.0091	*
WSH9	0.00000+-0.0000	0.00000+-0.0000	0.00000+-0.0000	0.00000+-0.0000	0.00000+-0.0000	0.00000+-0.0000	0.00000+-0.0000	0.00000+-0.0000	0.00000+-0.0000	0.00000+-0.0000	0.00000+-0.0000	0.00000+-0.0000	0.00000+-0.0000	0.00000+-0.0000	0.00000+-0.0000	0.00000+-0.0000	0.00000+-0.0000	0.00000+-0.0000	0.00000+-0.0000	0.00000+-0.0000	0.00000+-0.0000	0.00000+-0.0000	0.00000+-0.0000	0.00000+-0.0000	0.00000+-0.0000	0.00000+-0.0000	0.00000+-0.0000	0.00000+-0.0000	0.00000+-0.0000	0.00000+-0.0000	0.00000+-0.0000	0.00000+-0.0000	0.00000+-0.0000	0.00000+-0.0000	0.00000+-0.0000	0.00000+-0.0000	0.00000+-0.0000	0.00000+-0.0000	0.00000+-0.0000	0.00000+-0.0000	0.00000+-0.0000	0.00000+-0.0000	0.00000+-0.0000	*
SW3	0.00000+-0.0000	0.00000+-0.0000	0.00000+-0.0000	0.00000+-0.0000	0.00000+-0.0000	0.00000+-0.0000	0.00000+-0.0000	0.00000+-0.0000	0.00000+-0.0000	0.00000+-0.0000	0.00000+-0.0000	0.00000+-0.0000	0.00000+-0.0000	0.00000+-0.0000	0.00000+-0.0000	0.00000+-0.0000	0.00000+-0.0000	0.00000+-0.0000	0.00000+-0.0000	0.00000+-0.0000	0.00000+-0.0000	0.00000+-0.0000	0.00000+-0.0000	0.00000+-0.0000	0.00000+-0.0000	0.00000+-0.0000	0.00000+-0.0000	0.00000+-0.0000	0.00000+-0.0000	0.00000+-0.0000	0.00000+-0.0000	0.00000+-0.0000	0.00000+-0.0000	0.00000+-0.0000	0.00000+-0.0000	0.00000+-0.0000	0.00000+-0.0000	0.00000+-0.0000	0.00000+-0.0000	0.00000+-0.0000	0.00000+-0.0000	0.00000+-0.0000	0.00000+-0.0000	0.00000+-0.0000	*
TG2	0.00000+-0.0000	0.00000+-0.0000	0.00000+-0.0000	0.00000+-0.0000	0.00000+-0.0000	0.00000+-0.0000	0.00000+-0.0000	0.00000+-0.0000	0.00000+-0.0000	0.00000+-0.0000	0.00000+-0.0000	0.00000+-0.0000	0.00000+-0.0000	0.00000+-0.0000	0.00000+-0.0000	0.00000+-0.0000	0.00000+-0.0000	0.00000+-0.0000	0.00000+-0.0000	0.00000+-0.0000	0.00000+-0.0000	0.00000+-0.0000	0.00000+-0.0000	0.00000+-0.0000	0.00000+-0.0000	0.00000+-0.0000	0.00000+-0.0000	0.00000+-0.0000	0.00000+-0.0000	0.00000+-0.0000	0.00000+-0.0000	0.00000+-0.0000	0.00000+-0.0000	0.00000+-0.0000	0.00000+-0.0000	0.00000+-0.0000	0.00000+-0.0000	0.00000+-0.0000	0.00000+-0.0000	0.00000+-0.0000	0.00000+-0.0000	0.00000+-0.0000	0.00000+-0.0000	0.00000+-0.0000	0.00000+-0.0000	*
MC	0.00000+-0.0000	0.00000+-0.0000	0.00000+-0.0000	0.00000+-0.0000	0.00000+-0.0000	0.00000+-0.0000	0.00000+-0.0000	0.00000+-0.0000	0.00000+-0.0000	0.00000+-0.0000	0.00000+-0.0000	0.00000+-0.0000	0.00000+-0.0000	0.00000+-0.0000	0.00000+-0.0000	0.00000+-0.0000	0.00000+-0.0000	0.00000+-0.0000	0.00000+-0.0000	0.00000+-0.0000	0.00000+-0.0000	0.00000+-0.0000	0.00000+-0.0000	0.00000+-0.0000	0.00000+-0.0000	0.00000+-0.0000	0.00000+-0.0000	0.00000+-0.0000	0.00000+-0.0000	0.00000+-0.0000	0.00000+-0.0000	0.00000+-0.0000	0.00000+-0.0000	0.00000+-0.0000	0.00000+-0.0000	0.00000+-0.0000	0.00000+-0.0000	0.00000+-0.0000	0.00000+-0.0000	0.00000+-0.0000	0.00000+-0.0000	0.00000+-0.0000	0.00000+-0.0000	0.00000+-0.0000	0.00000+-0.0000	0.00000+-0.0000	*
