# Supplementary material for: Harnessing genome-wide genetic diversity, population structure and linkage disequilibrium in Ethiopian durum wheat gene pool
Source: Front Plant Sci. 2023 Jul 20;14:1192356. doi: 10.3389/fpls.2023.1192356 (PMC10400094; doi:10.3389/fpls.2023.1192356)
Supplement: Supplementary file 10 [file Table_7.xlsx]

## Sheet: Sheet1
Supplementary Table 7. The matrix of the historical rates of gene flow (Nm) for all pairs of populations.
	EH1	NSH1	WSH1	WSH3	WH	WGM1	WGM2	WSH2	AR1	BL1	NSH2	NG1	NG2	ESH1	WSH4	NW	BL2	NO	JM	NG3	EH2	ESH2	NSH3	SM	WSH5	WSH6	WSH7	NSH4	ESH3	NSH5	NSH6	TG1	NSH7	NSH8	EH3	AR2	AR3	NSH9	SW1	SW2	EGM	AR4	WSH8	WSH9	SW3	TG2	MC
EH1
NSH1	0.45946
WSH1	0.3843	0.95501
WSH3	0.601	0.15047	0.14079
WH	0.47263	0.05602	0.03663	0.23867
WGM1	0.28607	0.05686	0.0482	0.30419	0.09154
WGM2	0.22576	0.02724	0.01718	0.16488	0.04809	0.07154
WSH2	0.333	0.04379	0.01225	0.11605	0.03037	0.04292	0.01357
AR1	0.2949	0.05662	0.04886	0.2533	0.12479	0.11473	0.08485	0.04554
BL1	0.51264	0.13475	0.12716	0.88559	0.23954	0.25079	0.18414	0.10787	0.28053
NSH2	0.26632	0.03104	0.01881	0.14473	0.05829	0.06199	0.03053	0.01466	0.08394	0.16037
NG1	0.6515	0.06002	0.03236	0.13495	0.05435	0.05765	0.02549	0.02475	0.05673	0.12909	0.02974
NG2	0.42242	0.07475	0.06214	0.43157	0.13823	0.14546	0.08626	0.05039	0.18597	0.55354	0.08257	0.06914
ESH1	0.29816	0.02949	0.01737	0.24563	0.072	0.0876	0.0485	0.01265	0.27556	0.28975	0.04474	0.02751	0.1503
WSH4	0.17039	0.01238	0.00329	0.22082	0.01929	0.06006	0.01479	0.00011	0.05428	0.17477	0.01117	0.01031	0.06829	0.01477
NW	0.47984	0.11671	0.1095	0.8031	0.2139	0.21336	0.153	0.09674	0.25008	0.81653	0.13035	0.11524	0.43867	0.26287	0.14753
BL2	0.54676	31.2776	1.2546	0.19665	0.09516	0.07766	0.04577	0.09335	0.07873	0.17324	0.05358	0.09949	0.10941	0.05361	0.02736	0.15356
NO	0.3251	0.03832	0.02339	0.14762	12.073	0.06056	0.03244	0.01901	0.08948	0.15377	0.03958	0.03681	0.08608	0.04403	0.01202	0.13494	0.06599
JM	1.04626	0.12413	0.09483	0.30121	0.15668	0.12188	0.06851	0.076	0.1311	0.28121	0.1007	0.12584	0.17672	0.10445	0.04182	0.25526	0.17685	0.09782
NG3	0.84586	0.21385	0.19432	0.41825	0.29802	0.2006	0.16781	0.19604	0.23037	0.38653	0.20459	0.24235	0.30551	0.23316	0.12022	0.39346	0.26396	0.21286	0.41715
EH2	0.49717	0.02435	0.0062	0.19399	0.05557	0.06633	0.02352	9e-05	0.07641	0.19289	0.02302	0.02019	0.08737	0.02416	0.0001	0.17126	0.0554	0.03116	0.1085	0.36056
ESH2	0.47503	0.04918	0.02869	0.21657	30.8709	0.07804	0.03942	0.02212	0.1105	0.21993	0.04809	0.04888	0.12204	0.057	0.01315	0.19613	0.08839	inf	0.14479	0.29178	0.03906
NSH3	0.45325	0.05716	0.01623	0.17189	0.04458	0.05668	0.01787	inf	0.06015	0.15637	0.0193	0.03225	0.07417	0.01851	0.00012	0.14304	0.12364	0.02504	0.11212	0.26142	7e-05	0.03243
SM	0.25022	0.01861	0.00612	0.22442	0.03766	0.07705	0.02484	0.00144	0.11957	0.26666	0.02048	0.01477	0.09952	0.03881	0.00185	0.20207	0.04052	0.02152	0.07032	0.17502	0.00239	0.02646	0.00206
WSH5	0.314	0.02176	0.00577	0.17852	0.04539	0.06343	0.02103	0.0002	0.0836	0.19631	inf	0.01877	0.08672	0.028	0.00018	0.1584	0.04922	0.02567	0.10466	0.23659	0.0002	0.03169	0.00024	0.00271
WSH6	0.4532	0.05722	0.01631	0.17191	0.04463	0.0567	0.01789	1.82208	0.06017	0.15639	0.01933	0.0323	0.0742	0.01855	0.00014	0.14306	0.12368	0.02507	0.11216	0.2614	0.00012	0.03248	2.15625	0.0021	0.00028
WSH7	0.52119	0.06663	0.04377	0.21998	0.08999	0.08896	0.04309	0.04261	0.08605	0.20792	0.06288	0.0659	0.11547	0.05304	0.01977	0.1905	0.10796	0.05514	0.15428	0.29843	0.04493	0.07737	0.06136	0.0336	0.0521	0.06142
NSH4	0.44029	0.03076	0.00766	0.18025	0.05063	0.06378	0.02206	0.00015	0.06932	0.17955	0.02438	0.02607	0.08222	0.02169	0.0001	0.15338	0.07003	0.02835	0.10154	0.27524	2e-05	0.03616	0.00012	0.00222	0.00023	0.00019	0.07324
ESH3	0.3849	0.02602	0.00669	0.17827	7.79593	0.06024	0.02113	0.0002	0.08456	0.18401	0.02395	0.02238	0.0874	0.02533	0.00015	0.16004	0.05976	inf	0.09947	0.24506	0.00016	534.222	0.00021	0.00251	0.00033	0.00027	0.04418	0.00017
NSH5	0.66265	0.11479	0.10118	0.36344	0.27852	0.16152	0.12405	0.10421	0.30889	0.40182	0.17443	0.13037	0.27956	0.25953	0.07501	0.35335	0.15611	0.18573	0.28537	0.42895	0.18513	0.26131	0.14821	0.1465	0.19169	0.14823	0.19116	0.17828	0.19903
NSH6	0.27397	0.04696	0.03831	0.23278	0.101	0.09908	0.06836	0.0348	0.46484	0.25013	0.07523	0.04588	0.15073	0.23669	0.03868	0.22993	0.06891	0.06998	0.1238	0.21857	0.05615	0.08795	0.04769	0.08409	0.07196	0.04771	0.07371	0.05323	0.06249	0.26419
TG1	0.43708	0.08227	0.06792	0.38448	0.3067	0.13193	0.09673	0.06212	0.16899	0.50344	0.0906	0.07937	0.25445	0.14256	0.06047	0.39176	0.11788	0.19396	0.18415	0.30551	0.11659	0.27119	0.08968	0.10259	0.09574	0.08971	0.12846	0.10256	0.20392	0.29291	0.14092
NSH7	0.42486	0.05515	0.03781	0.20162	19.4555	0.08011	0.04704	0.03293	0.11899	0.20595	0.05907	0.0547	0.12323	0.06939	0.0205	0.18331	0.0899	56.0526	0.14146	0.27321	0.05734	inf	0.04578	0.03822	0.04706	0.04581	0.08301	0.05221	18.2883	0.26762	0.09543	0.26948
NSH8	0.21906	0.01594	0.00423	0.24656	0.03113	0.06807	0.0199	0.0001	0.08242	0.28056	0.01668	0.0126	0.11836	0.02291	0.00022	0.21941	0.03602	0.01794	0.05848	0.16624	7e-05	0.02102	0.0001	0.00313	0.00021	0.00013	0.0281	7e-05	0.00016	0.11366	0.05824	0.1035	0.03191
EH3	0.59746	0.15117	0.14298	0.49244	0.28275	0.1936	0.16679	0.1526	0.32968	0.41385	0.21321	0.15946	0.29203	0.26652	0.13371	0.39055	0.18858	0.20179	0.34675	0.43493	0.2162	0.2652	0.20294	0.19897	0.24167	0.20294	0.23434	0.22121	0.22331	0.54238	0.33548	0.3076	0.26505	0.17777
AR2	0.28676	0.04773	0.03868	0.24734	0.10432	0.10104	0.06924	0.03509	0.49263	0.26067	0.07559	0.04639	0.15711	0.24074	0.03955	0.23719	0.07045	0.07218	0.12627	0.22473	0.0576	0.09066	0.04809	0.08791	0.07167	0.04812	0.07519	0.05389	0.06392	0.28136	5.19206	0.1467	0.09916	0.05923	0.37446
AR3	0.47528	0.10261	0.09537	0.51069	0.24039	0.19675	0.15607	0.08899	0.92357	0.56649	0.16885	0.10208	0.36443	0.62063	0.10713	0.51105	0.13759	0.15532	0.26709	0.36774	0.15943	0.21631	0.13149	0.24997	0.20073	0.13152	0.16934	0.14874	0.17458	0.54352	7.48178	0.32076	0.21182	0.17721	0.59537	4.70671
NSH9	0.47164	0.0986	0.08903	0.66128	0.20122	0.1984	0.14156	0.07713	0.31267	1.0183	0.12781	0.0951	0.50329	0.28919	0.11514	0.63235	0.1346	0.12635	0.23571	0.34375	0.14473	0.17999	0.11384	0.20304	0.14912	0.11386	0.16097	0.12453	0.14236	0.37629	0.28278	0.41879	0.17486	0.23481	0.42343	0.30061	0.75876
SW1	0.62724	0.14444	0.13387	0.79267	0.26131	0.26255	0.18623	0.11892	0.3004	0.76203	0.18795	0.13519	0.5067	0.28601	0.16581	0.67664	0.19003	0.16566	0.31186	0.42705	0.21982	0.23655	0.17256	0.25019	0.22761	0.17257	0.23494	0.19152	0.19574	0.43782	0.27363	0.40848	0.2252	0.29888	0.4999	0.28444	0.59137	0.88211
SW2	0.9423	0.18465	0.16629	0.6134	0.28281	0.23354	0.14596	0.17	0.22316	0.46155	0.18155	0.20128	0.32751	0.21287	0.11701	0.46336	0.24603	0.17356	0.43104	0.54234	0.24408	0.26177	0.253	0.18502	0.22125	0.25302	0.35666	0.25499	0.20866	0.44251	0.21337	0.32178	0.24293	0.16137	0.49915	0.22033	0.42924	0.4246	0.80561
EGM	0.33097	0.05744	0.04713	0.38912	0.0827	0.13701	0.06243	0.03897	0.11558	0.29447	0.05292	0.05676	0.14468	0.08169	0.05908	0.25647	0.08203	0.05483	0.12575	0.21691	0.05996	0.07299	0.05342	0.07325	0.0523	0.05345	0.08393	0.05574	0.05237	0.15674	0.09792	0.13932	0.07503	0.05948	0.22542	0.1016	0.20847	0.21766	0.28327	0.29496
AR4	0.2952	0.06427	0.05598	0.27238	0.11577	0.12512	0.07114	0.04886	0.12459	0.26445	0.07005	0.06262	0.16527	0.10675	0.04973	0.25373	0.08911	0.07283	0.15405	0.22573	0.07484	0.10403	0.07192	0.08451	0.07882	0.07197	0.09857	0.07639	0.07978	0.20021	0.12223	0.15937	0.10147	0.06756	0.20312	0.11982	0.30157	0.21964	0.25617	0.25342	0.11409
WSH8	0.9001	0.22955	0.20693	0.54464	0.32757	0.23129	0.15861	0.1948	0.21551	0.46224	0.18774	0.23351	0.33316	0.21449	0.11851	0.45272	0.3	0.20193	0.45943	0.54536	0.27358	0.30853	0.29057	0.19726	0.23508	0.29061	0.39498	0.30072	0.25197	0.45567	0.21054	0.34505	0.27829	0.17126	0.43134	0.21445	0.42056	0.4038	0.5755	1.22098	0.24218	0.36098
WSH9	0.22797	0.08147	0.07622	0.21703	0.11219	0.11122	0.07985	0.06918	0.09392	0.19969	0.07374	0.07554	0.12703	0.09115	0.05896	0.19441	0.1011	0.07701	0.14125	0.19813	0.09236	0.1052	0.09508	0.08373	0.08658	0.09509	0.11596	0.09135	0.08955	0.14629	0.09508	0.13508	0.09865	0.07384	0.15738	0.09335	0.16577	0.15806	0.19248	0.21527	0.11192	0.18797	0.3283
SW3	0.77261	0.08316	0.05159	0.1868	0.07505	0.07511	0.03633	0.05397	0.07218	0.16123	0.04431	0.10854	0.09403	0.04121	0.01823	0.1452	0.13106	0.0488	0.18304	0.2961	0.03789	0.06674	0.07401	0.02746	0.03537	0.07407	0.12457	0.04905	0.03779	0.14825	0.0617	0.10239	0.07159	0.02444	0.20957	0.06263	0.13535	0.12843	0.19609	0.32941	0.07563	0.08521	0.39857	0.09735
TG2	0.67975	0.11006	0.08189	0.25145	0.13079	0.10444	0.06037	0.08576	0.10401	0.22466	0.0777	0.119	0.14441	0.07679	0.03689	0.21821	0.15948	0.08438	0.23588	0.36516	0.0856	0.1211	0.12177	0.05601	0.07716	0.12181	0.20076	0.11569	0.08254	0.22931	0.09195	0.16579	0.12012	0.04812	0.27442	0.0951	0.19007	0.17734	0.25233	0.45572	0.11166	0.12022	0.46054	0.12782	0.2058
MC	0.31738	0.19891	0.19874	0.32397	0.22665	0.22861	0.1879	0.18956	0.19212	0.29614	0.18148	0.1893	0.23169	0.20273	0.17017	0.29912	0.21627	0.1844	0.25706	0.29552	0.20936	0.22012	0.22371	0.20044	0.20386	0.22376	0.23367	0.21285	0.20676	0.24856	0.20312	0.23728	0.20912	0.18611	0.24952	0.19759	0.27669	0.25817	0.29246	0.32145	0.22646	0.39746	0.43433	1.15286	0.21852	0.24222
